# Supplementary material
Source: PubMed Central journal article supplement (PMC7818620)
Supplement: ao0c04908_si_001.pdf [file ao0c04908_si_001.pdf]

Supporting information for:

**Strecker-derived methodology for library synthesis of *N*-acylated  $\alpha$ -aminonitriles**

Pedro Gonçalves<sup>1</sup>, Anke Peeraer<sup>1</sup>, Yves Adriaenssens<sup>1</sup>, Lara Zonnekeijn<sup>1</sup>, Philippe Franck<sup>2</sup>, Bert U. W. Maes<sup>2</sup>, Koen Augustyns<sup>1</sup>, and Pieter Van Der Veken<sup>1,\*</sup>

<sup>1</sup>Laboratory of Medicinal Chemistry, University of Antwerp, Universiteitsplein 1, 2610 Wilrijk, Belgium

<sup>2</sup>Organic Synthesis, Department of Chemistry, University of Antwerp, Groenenborgerlaan 171, 2020 Antwerp, Belgium

\*Corresponding author: [pieter.vanderveken@uantwerpen.be](mailto:pieter.vanderveken@uantwerpen.be)

**Table of Contents:**

|                                                   |      |
|---------------------------------------------------|------|
| Examples of unstable 4-tolylsulfonyl adducts..... | S-2  |
| Supercritical chiral chromatography.....          | S-4  |
| Chiral HPLC chromatograms .....                   | S-5  |
| LC-MS screening .....                             | S-9  |
| NMR spectra.....                                  | S-11 |
| HRMS.....                                         | S-49 |
| LC-MS Chromatograms .....                         | S-52 |
| FT-IR Chromatograms for Selected Compounds.....   | S-66 |

## Examples of unstable 4-tolylsulfonyl adducts

The compounds were prepared using the same protocol as described in *general method (A)* for *synthesis of phenyl-N-(3-phenyl-1-tosylpropyl)acetamide*. But we were unable to purify them and could only confirm the presence of the compound with UPLC-MS for **(S1)** or NMR for **(S2)**. In these two cases, change of color was associated with degradation.

### Compound **(S1)**

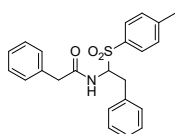

Sample 1 Vial 2:65 ID GQ-2018-001-1-FR018 File GQ-2018-001-1-FR018 Date 07-Mar-2018 Time 11:28:49 Description

1: MS ES+ :BPI Smooth (SG, 2x2)

8.9e+006

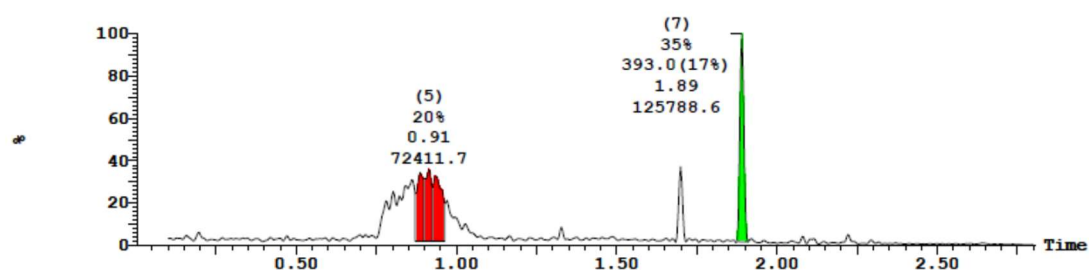

3: UV Detector: TIC

2.69e-2

Range: 3.001e-2

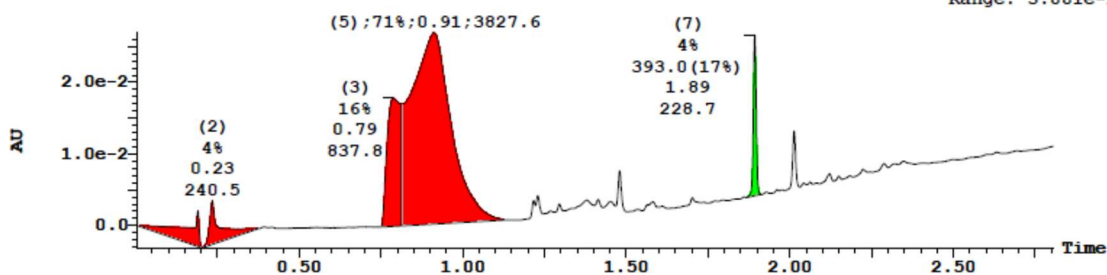

Sample Report (continued):

| Peak ID | Compound  | Time | Mass Found    |
|---------|-----------|------|---------------|
| 7       | Tentative | 1.89 | 394.00,416.00 |

7: (Time: 1.89) Combine (491:497-(485:487+502:504))

1:MS ES+

4.7e+006

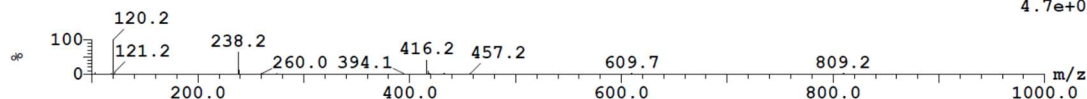

Figure S.1 – Chromatogram of compound **(S1)** after flash chromatography



## Supercritical chiral chromatography

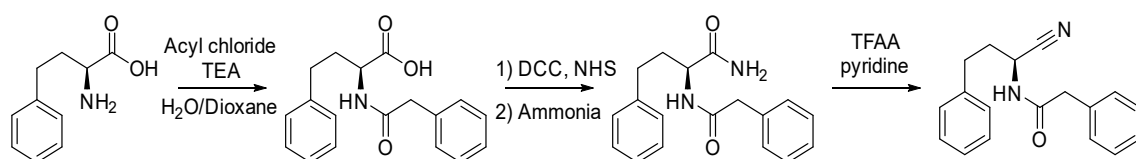

**Scheme S.1** – Synthetic scheme for the synthesis of chiral standard

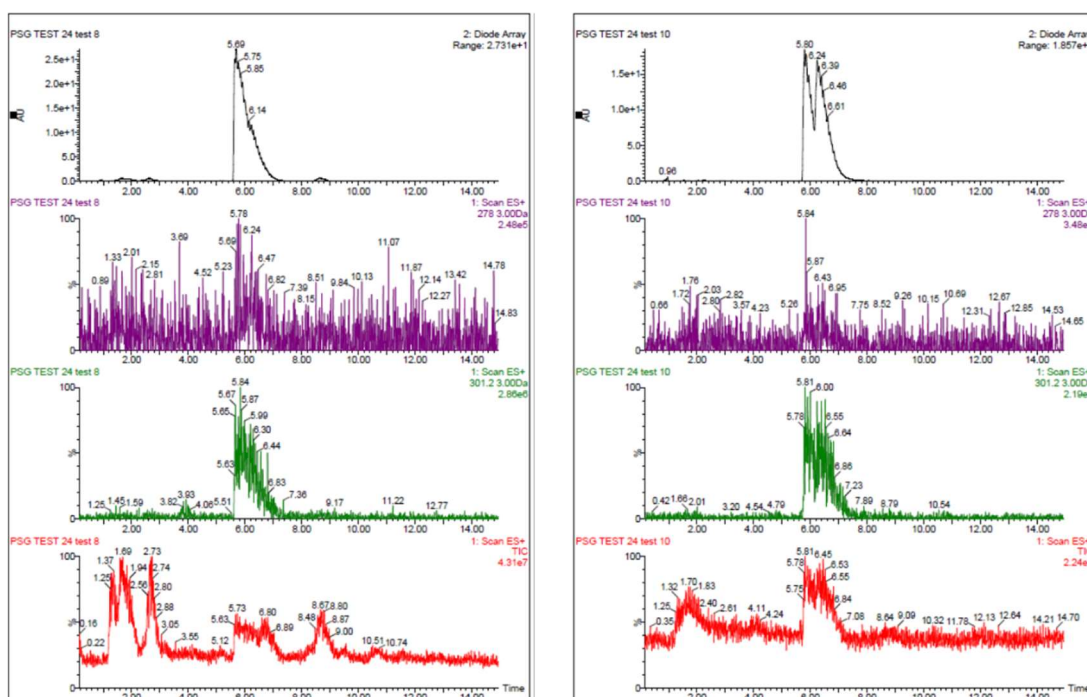

**Figure S.3** – SFC chromatograms: chiral standard (left) and compound **(11)** (right)

# Chiral HPLC chromatograms

Despite the peak having different shapes the area under the curve is the same.

## Compound (9)

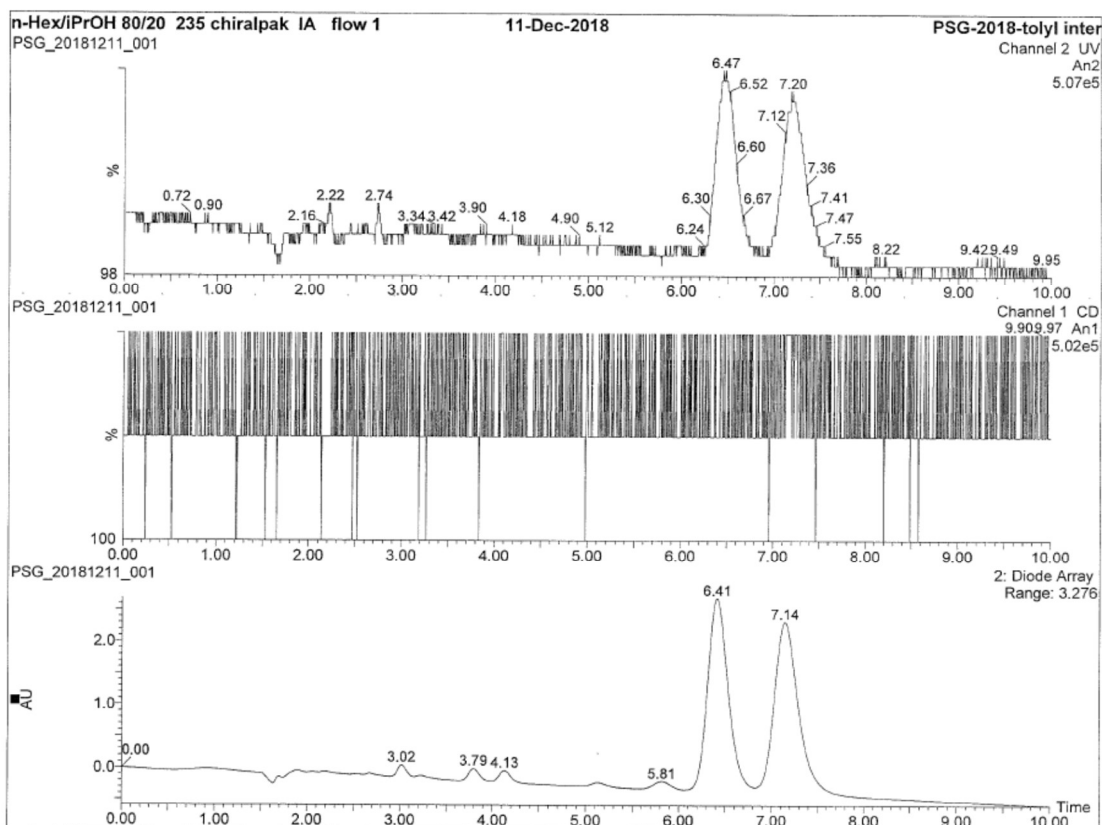

Figure S.4 – Chromatogram from chiral HPLC for compound (9)

## Compound (11)

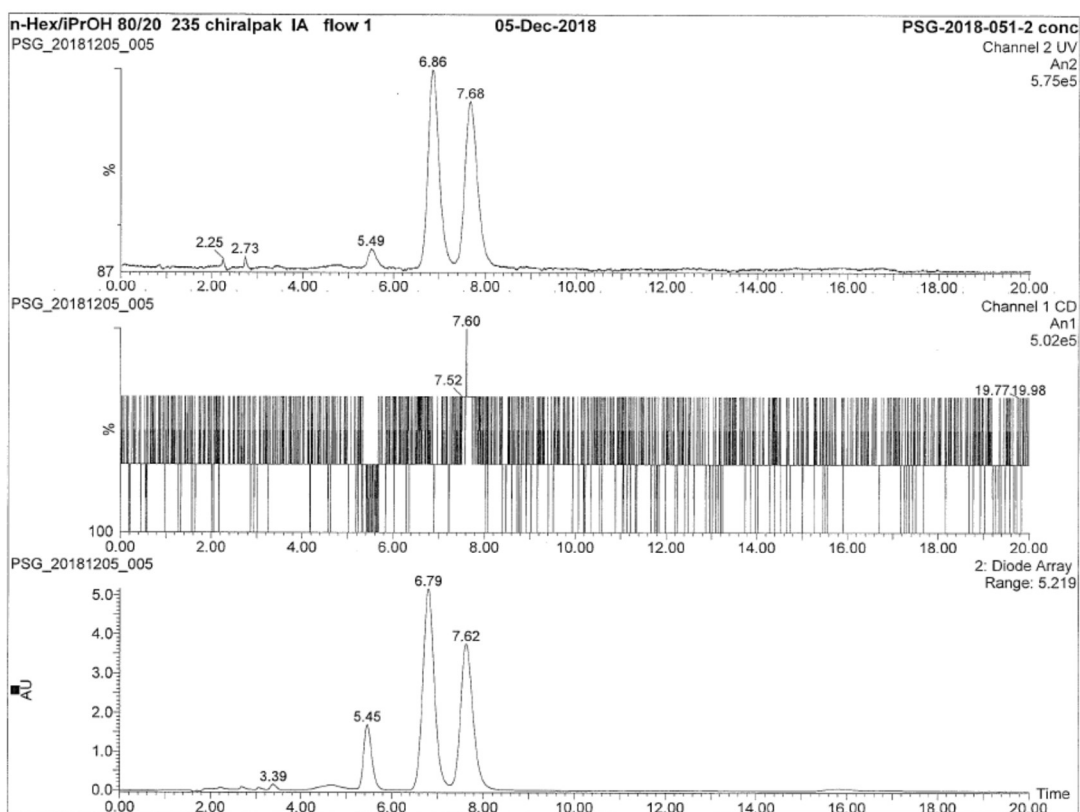

Figure S.5 – Chromatogram from chiral HPLC for compound (11). Normal reaction conditions.

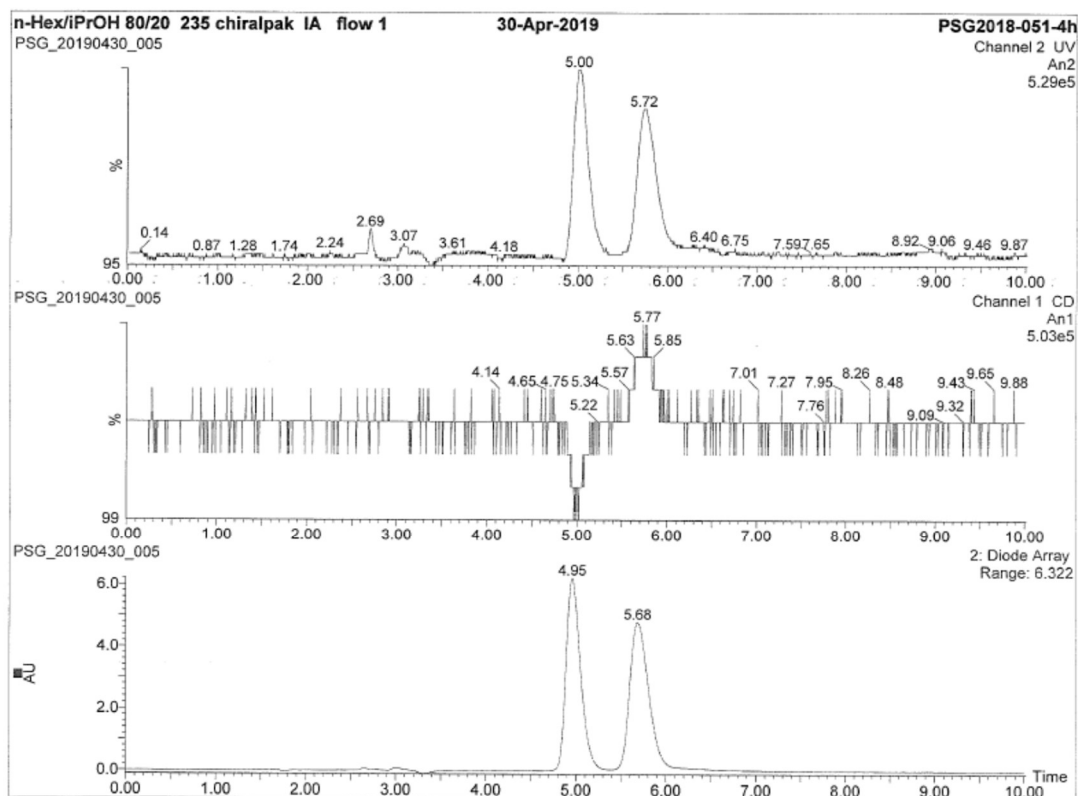

Figure S.6 – Chromatogram from chiral HPLC for compound (11). Attempt to induce enantioselectivity by adding quinine with KCN and maintaining reaction at -10°C.

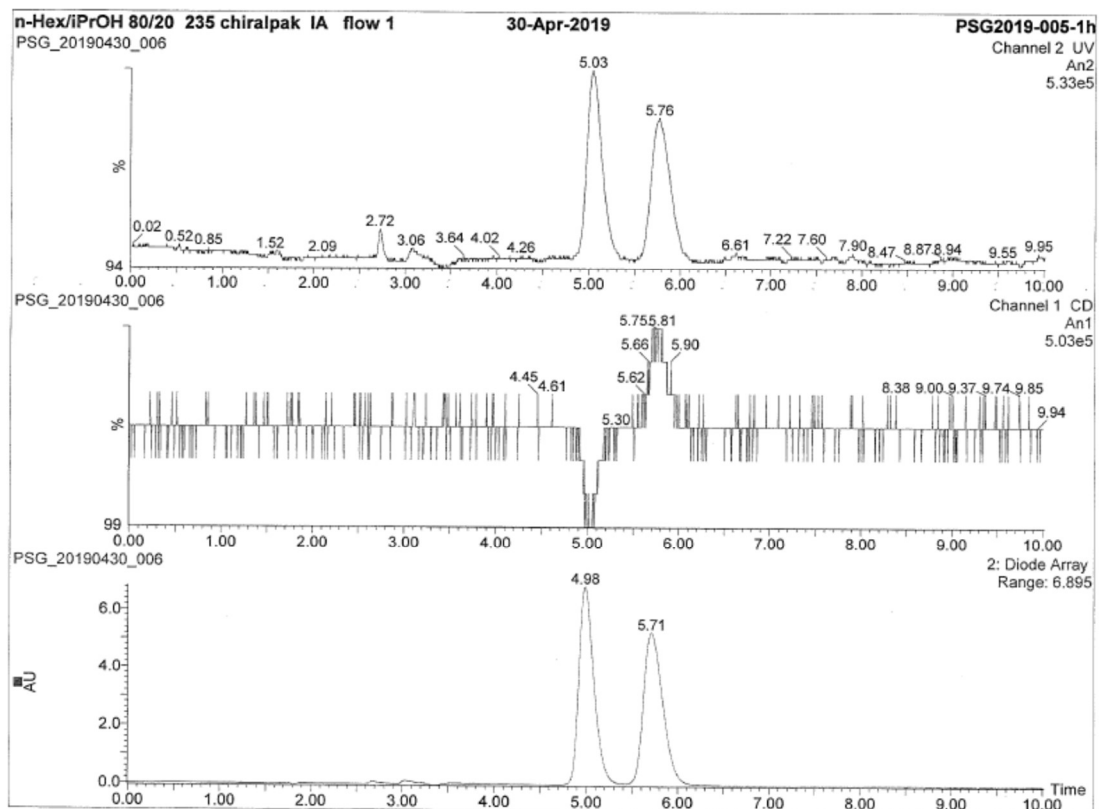

**Figure S.7** – Chromatogram from chiral HPLC for compound **(11)**. Attempt to induce enantioselectivity by adding quinine at beginning and maintaining reaction at room temperature. This reaction did not produce any product when performed at  $-10^{\circ}\text{C}$  from beginning until the end.

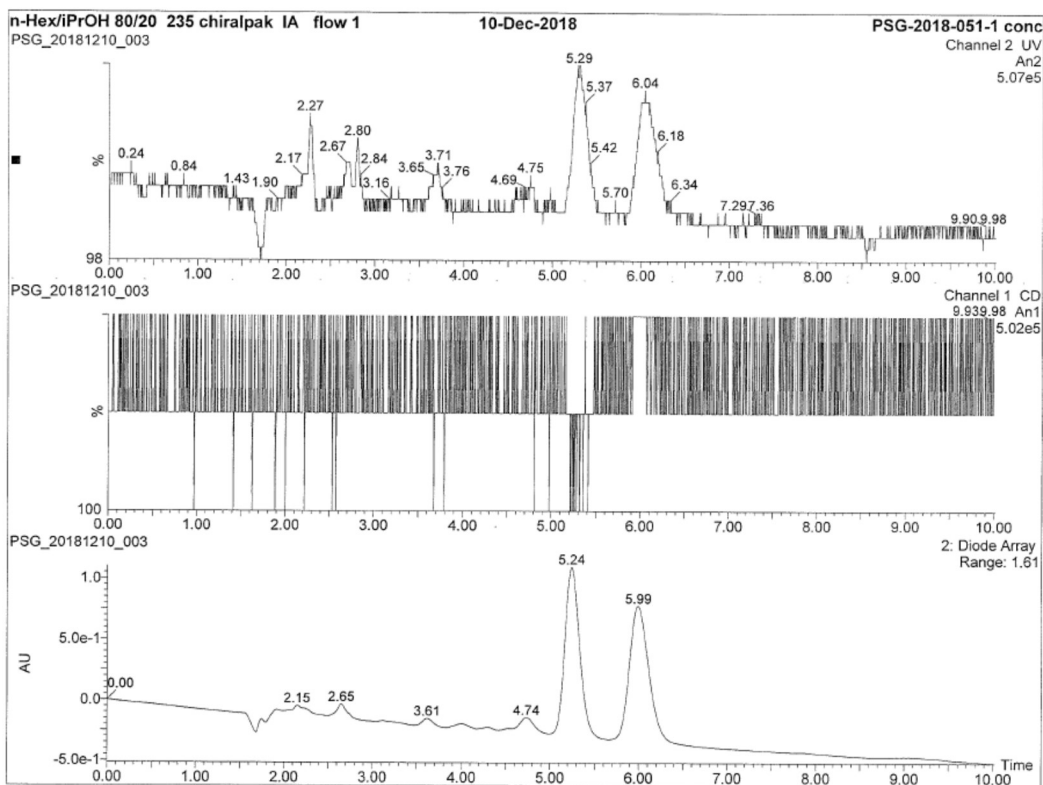

**Figure S.8** – Chromatogram from chiral HPLC for compound **(11)**. The sample used is from the experiment with methanesulfonic acid.

**Compound (13)**

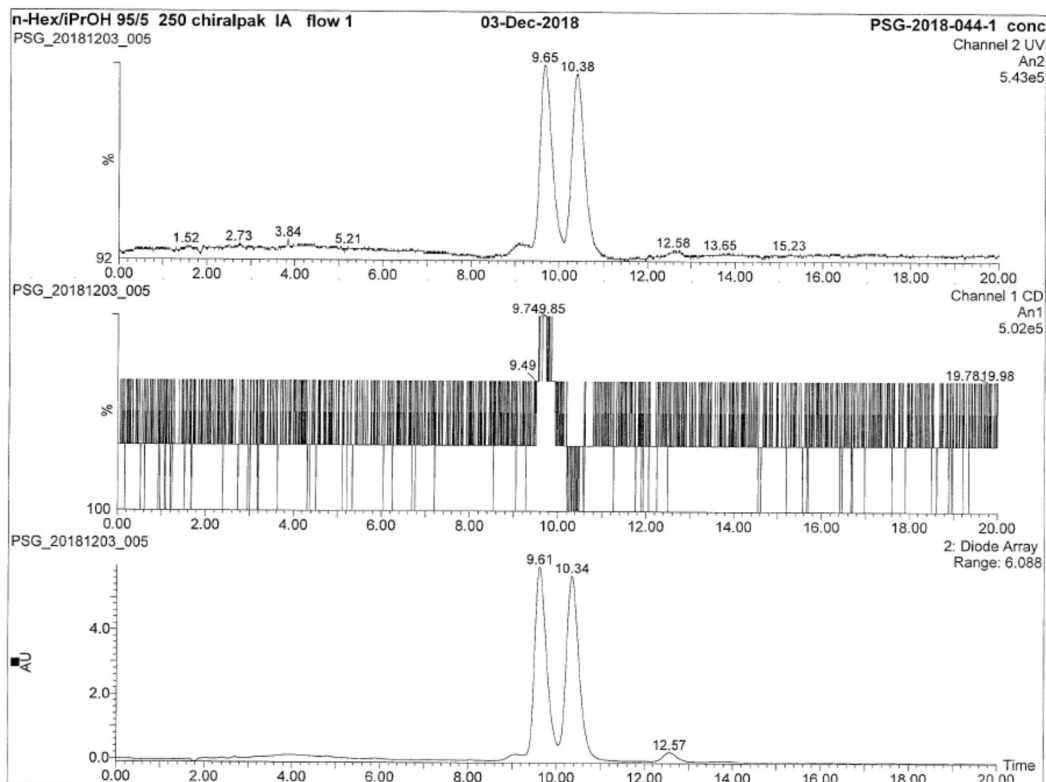

**Figure S.9** – Chromatogram from chiral HPLC for compound **(13)**.



## Compound (21)

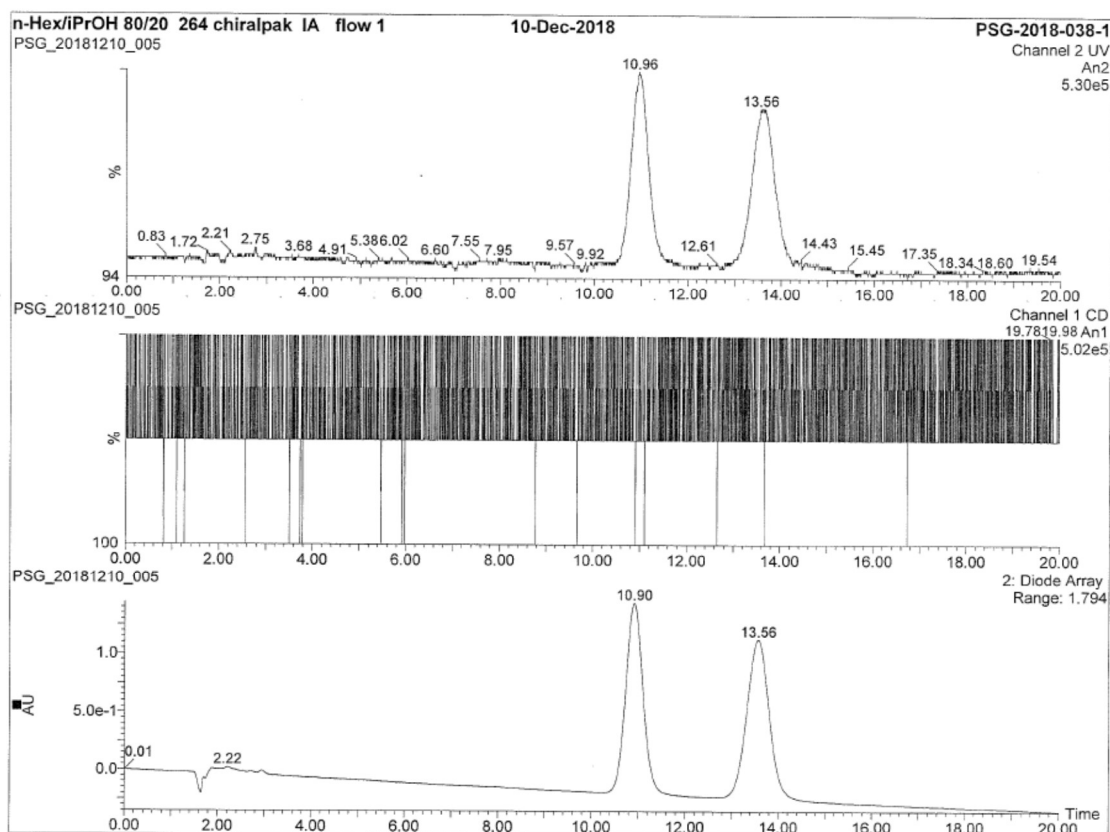

Figure S.10 – Chromatogram from chiral HPLC for compound (21).

## LC-MS screening

In order to screen a considerable number of conditions, the initial target-molecule was compound (11) which allows following the product formation with UPLC-MS. A calibration curve was performed for each method, the longer method was only used when there was peak overlap.

Calibration curve:

- Generic method, 13 concentrations in triplicate,  $R^2 = 0,9933$ , measured in a random order. Method: 0-0.15 minutes: 95% H<sub>2</sub>O+FA 0.1% 5% ACN+FA 0.1%; (gradient); 2-2.25 minutes: 100% H<sub>2</sub>O+FA 0.1%; 0.7 mL/min

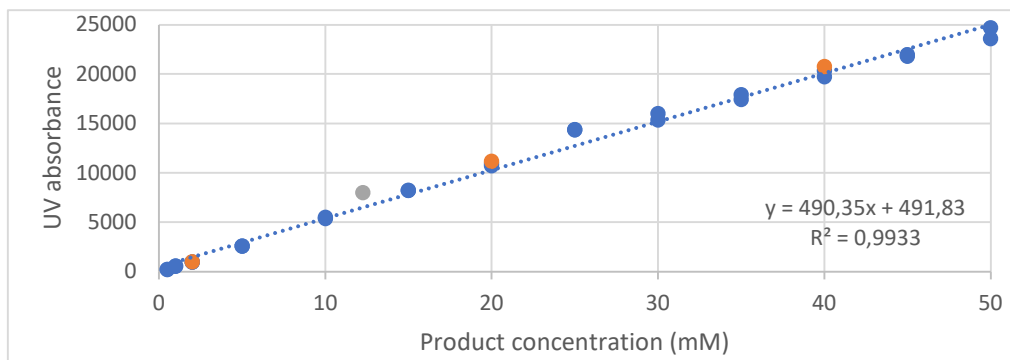

**Figure S.11** – Calibration curve for generic method on the UPLC-MS system. Prepared samples ran during working hours (blue), night (orange), and reaction mixture with known concentration (gray)

- Purity method, 13 concentrations in duplicate,  $R^2 = 0,9948$ , measured in a random order. Method: 0-0.15 minutes: 95% H<sub>2</sub>O+FA 0.1% 5% ACN+FA 0.1%; (gradient); 5-5.25 minutes: 100% H<sub>2</sub>O+FA 0.1%

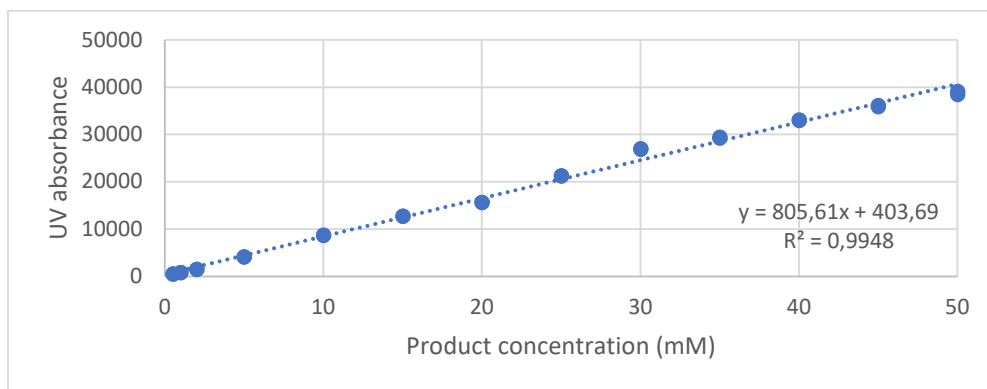

**Figure S.12** – Calibration curve for purity method on the UPLC-MS system. Prepared samples ran during working hours.

# NMR spectra

## Compound (9)

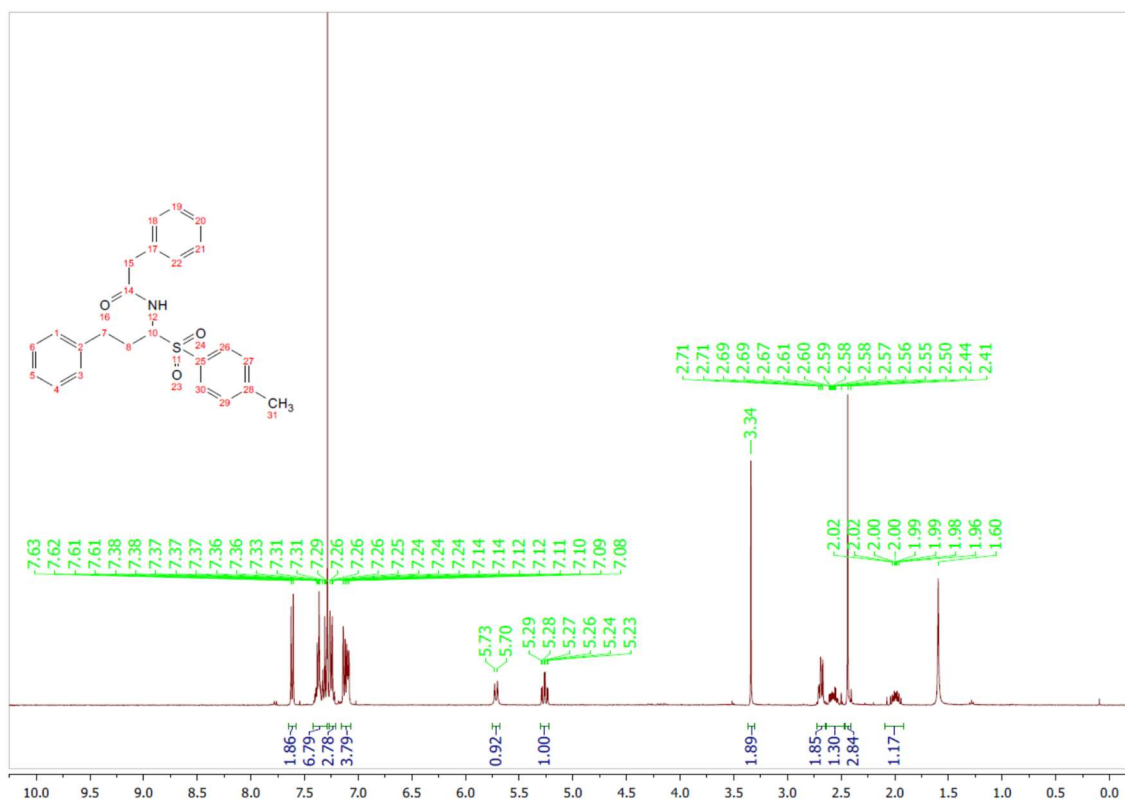

Figure S.13 – <sup>1</sup>H NMR compound (9) in CDCl<sub>3</sub>.

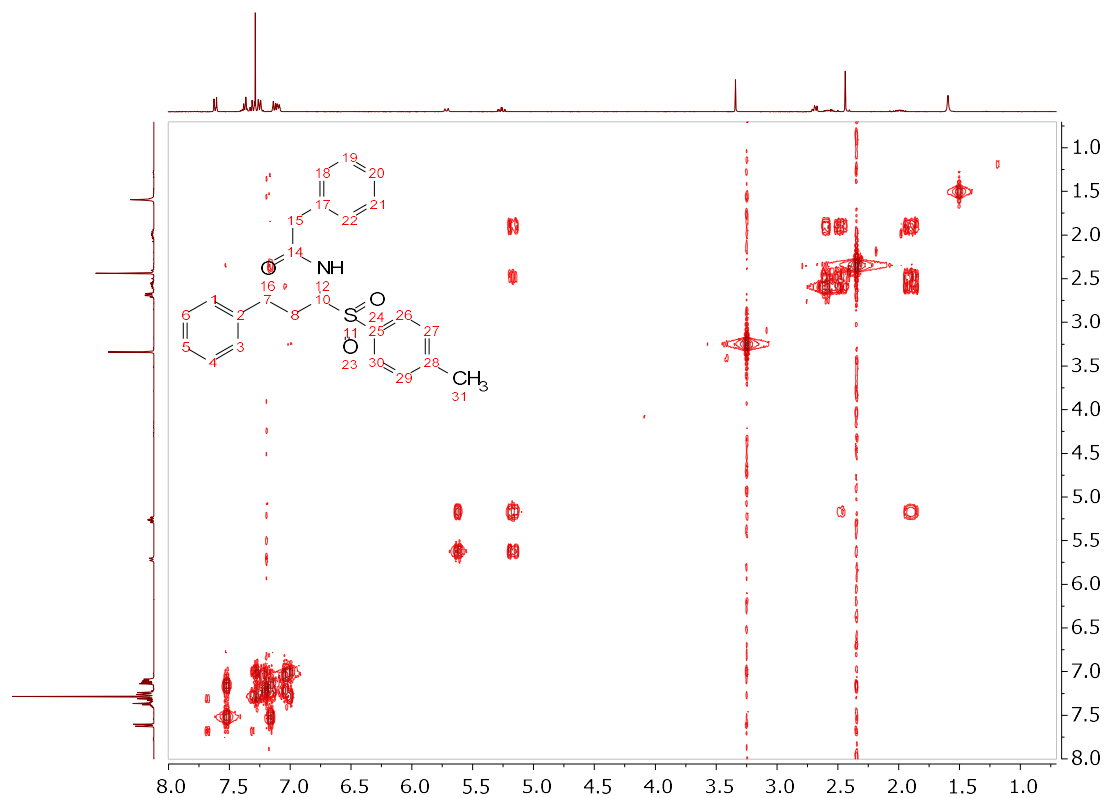

Figure S.14 – COSY compound (9) in CDCl<sub>3</sub>.

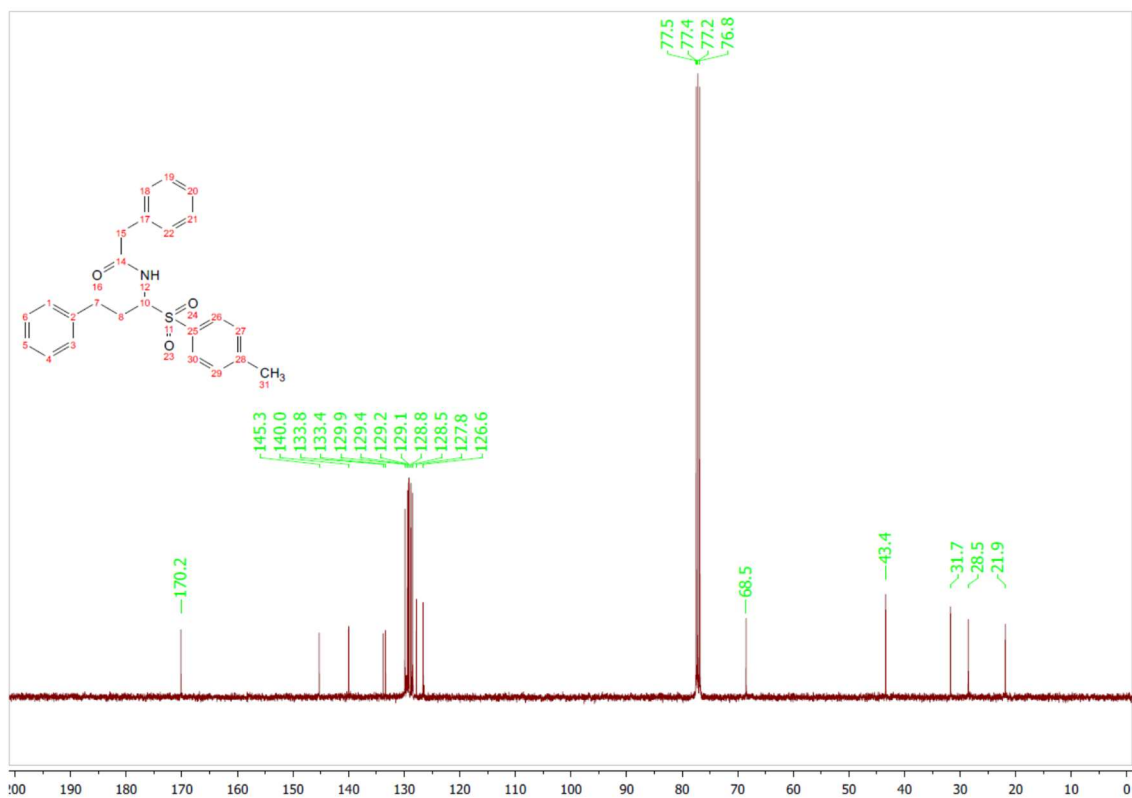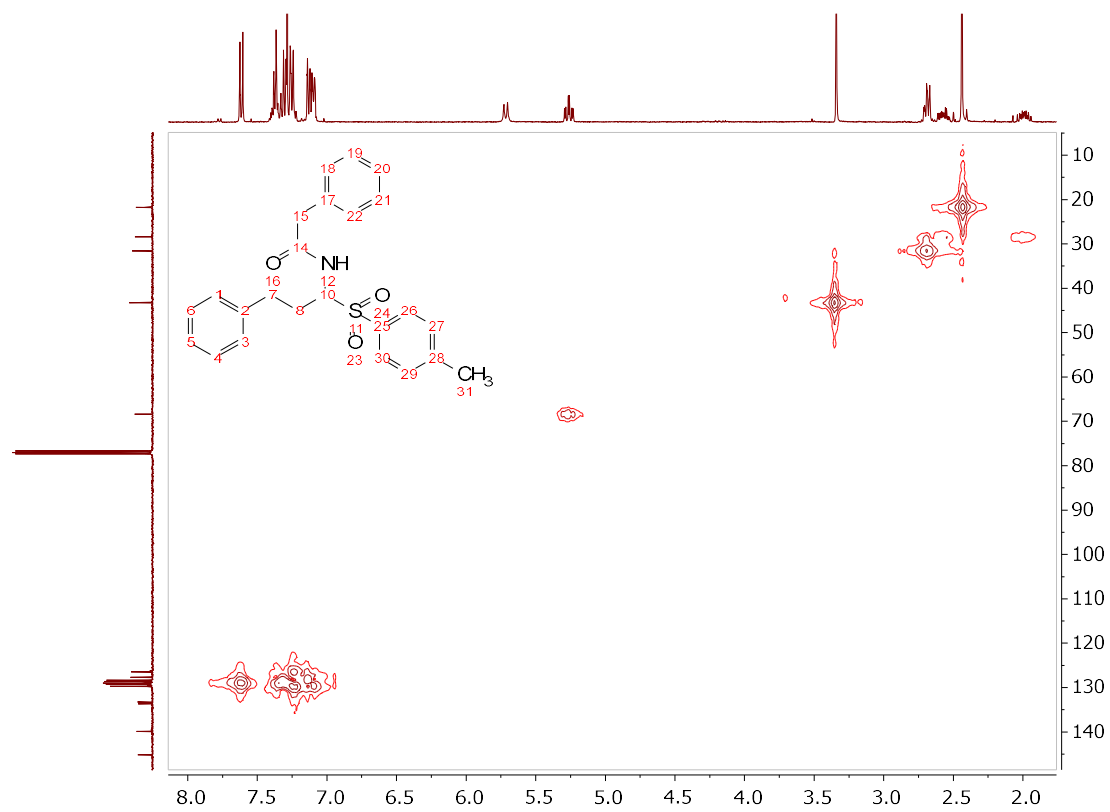

### Compound (11)

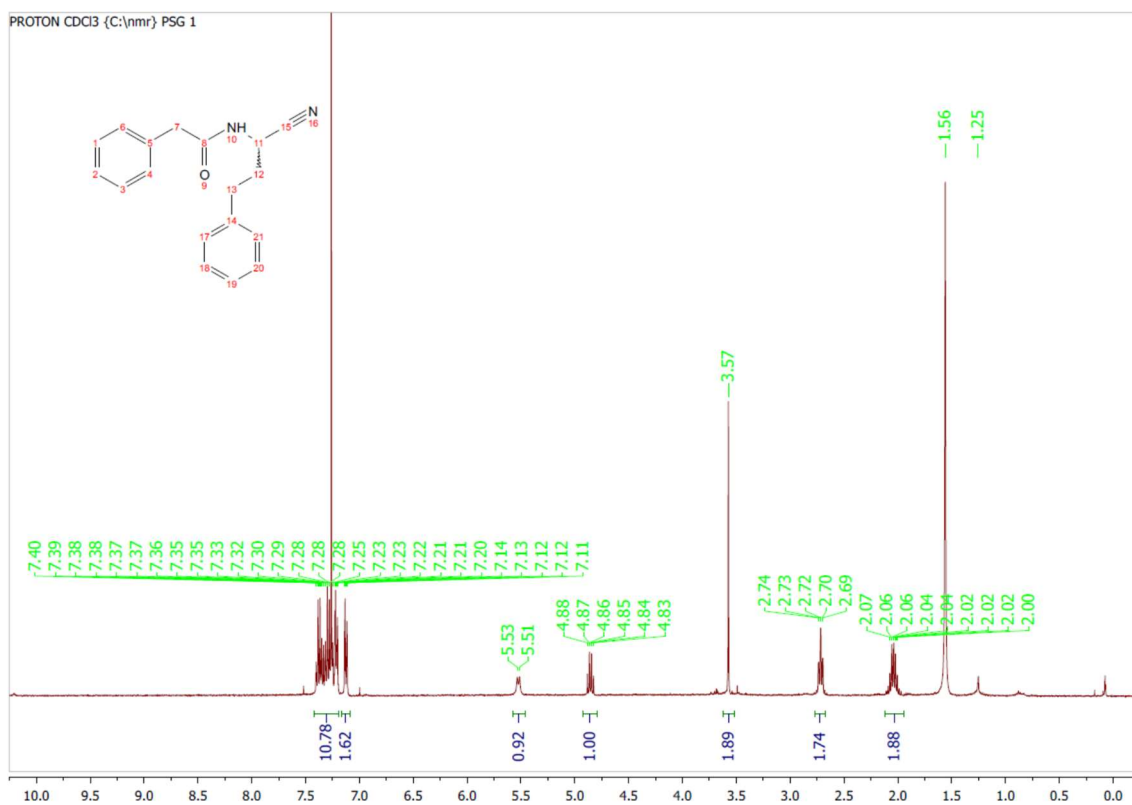

Figure S.17 – <sup>1</sup>H NMR compound (11) in CDCl<sub>3</sub>.

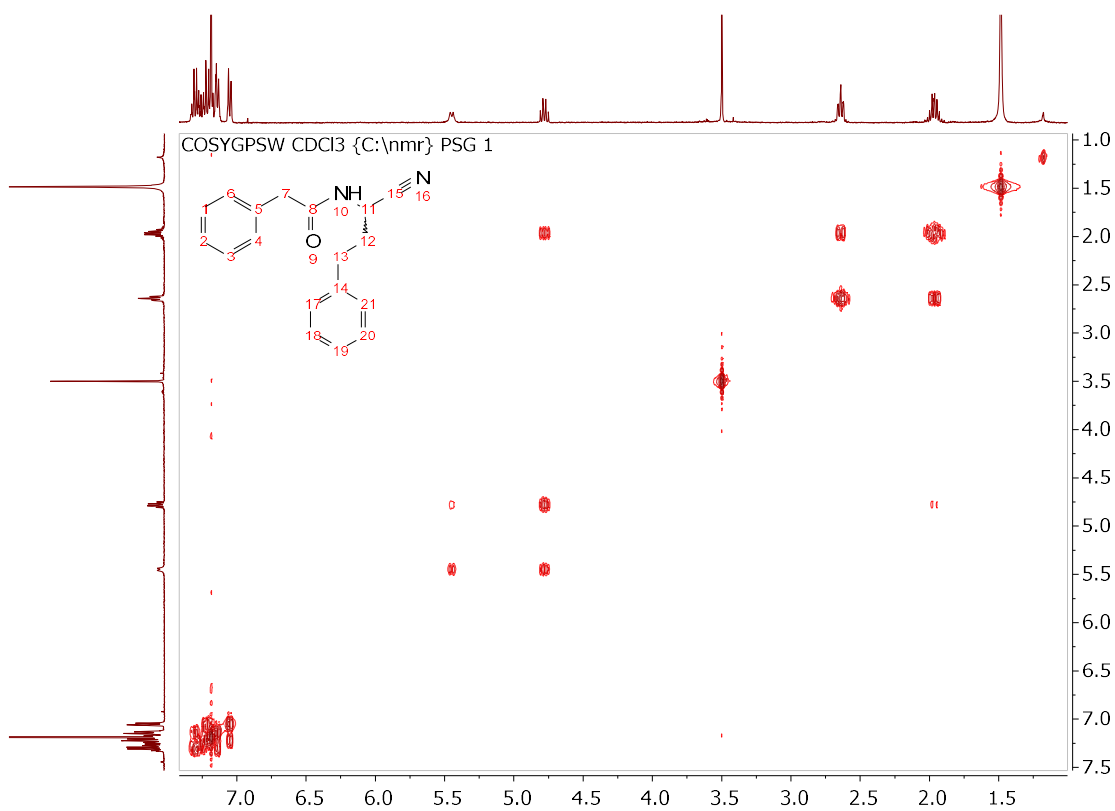

Figure S.18 – COSY compound (11) in CDCl<sub>3</sub>.

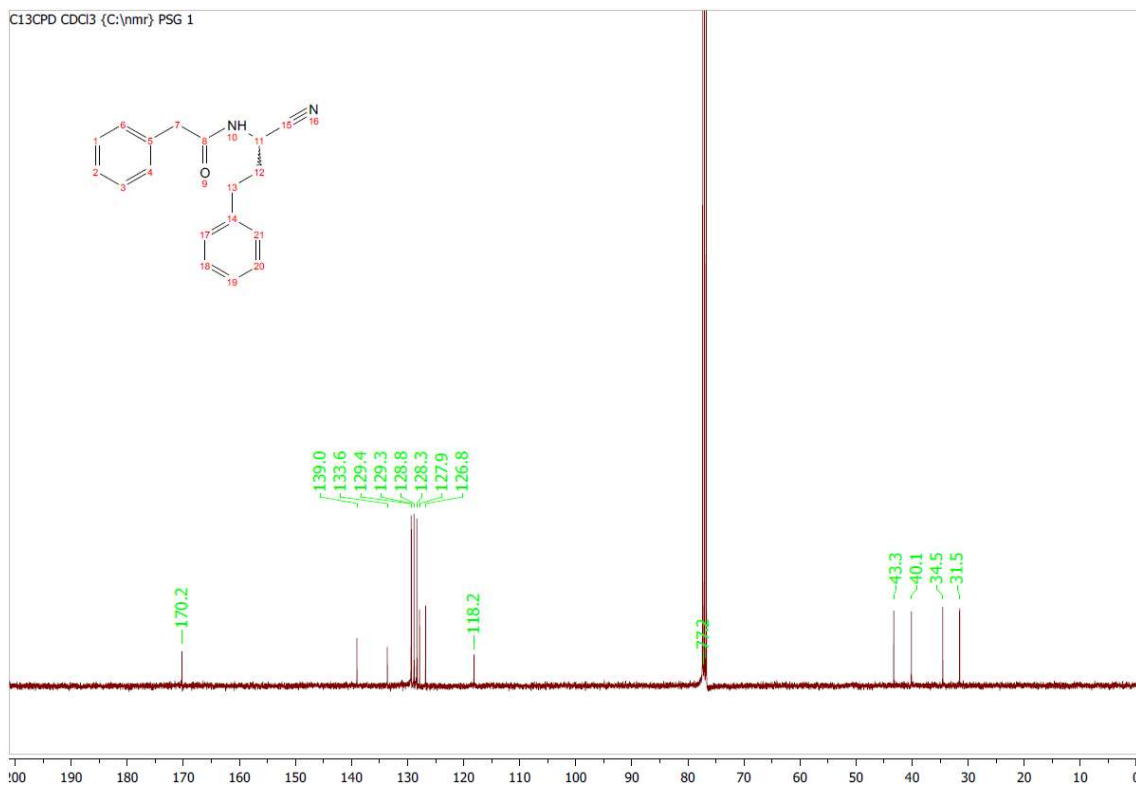

Figure S.19 – CPD compound (11) in CDCl<sub>3</sub>.

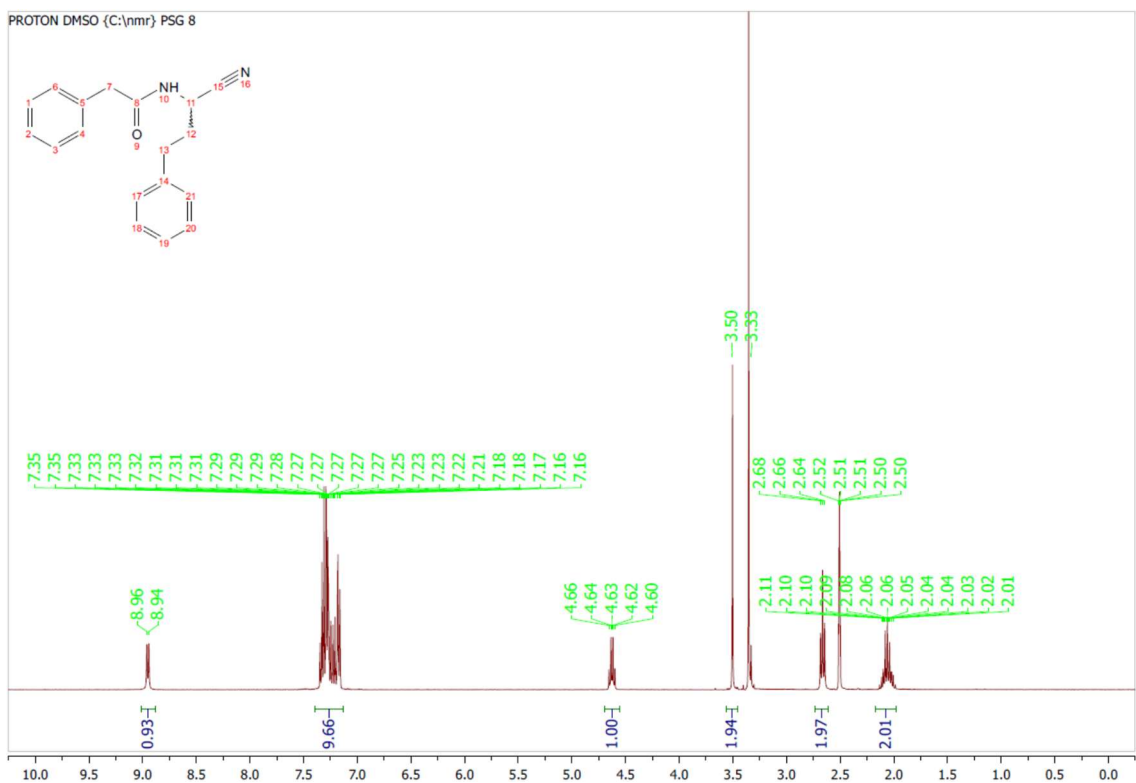

Figure S.20 – HNMR compound (11) in DMSO-d<sub>6</sub>.

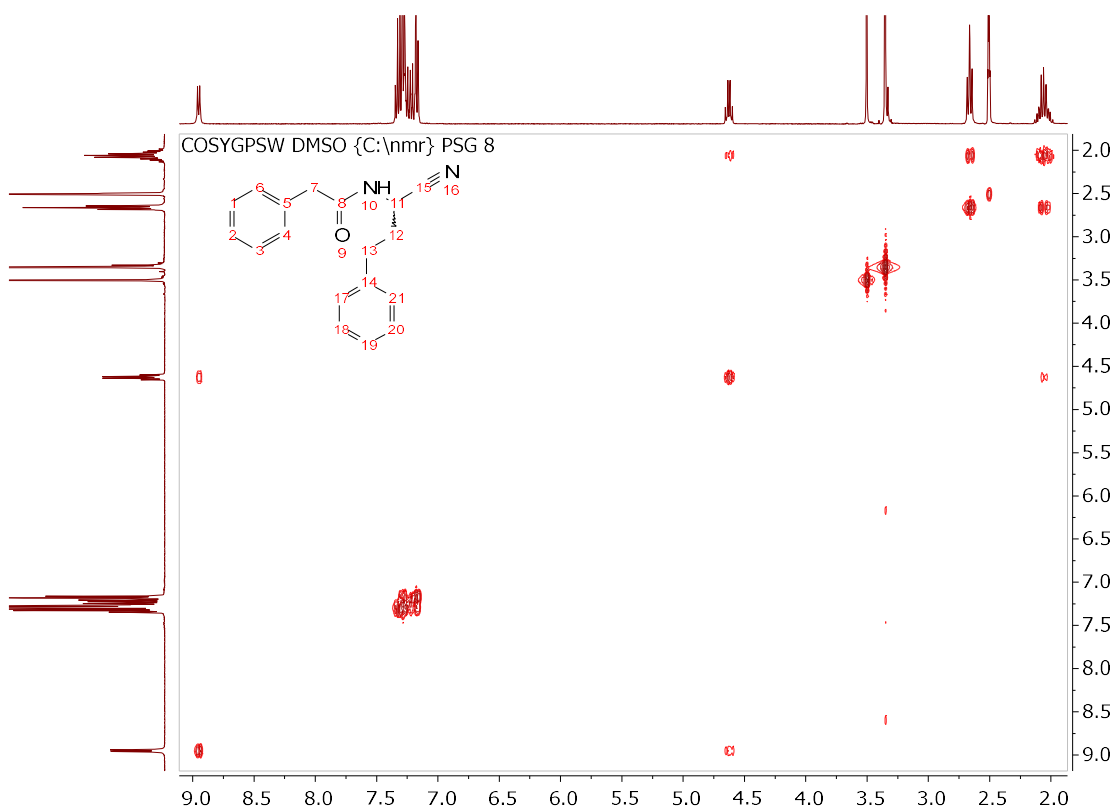

Figure S.21 – HNMR compound (11) in DMSO-d6.

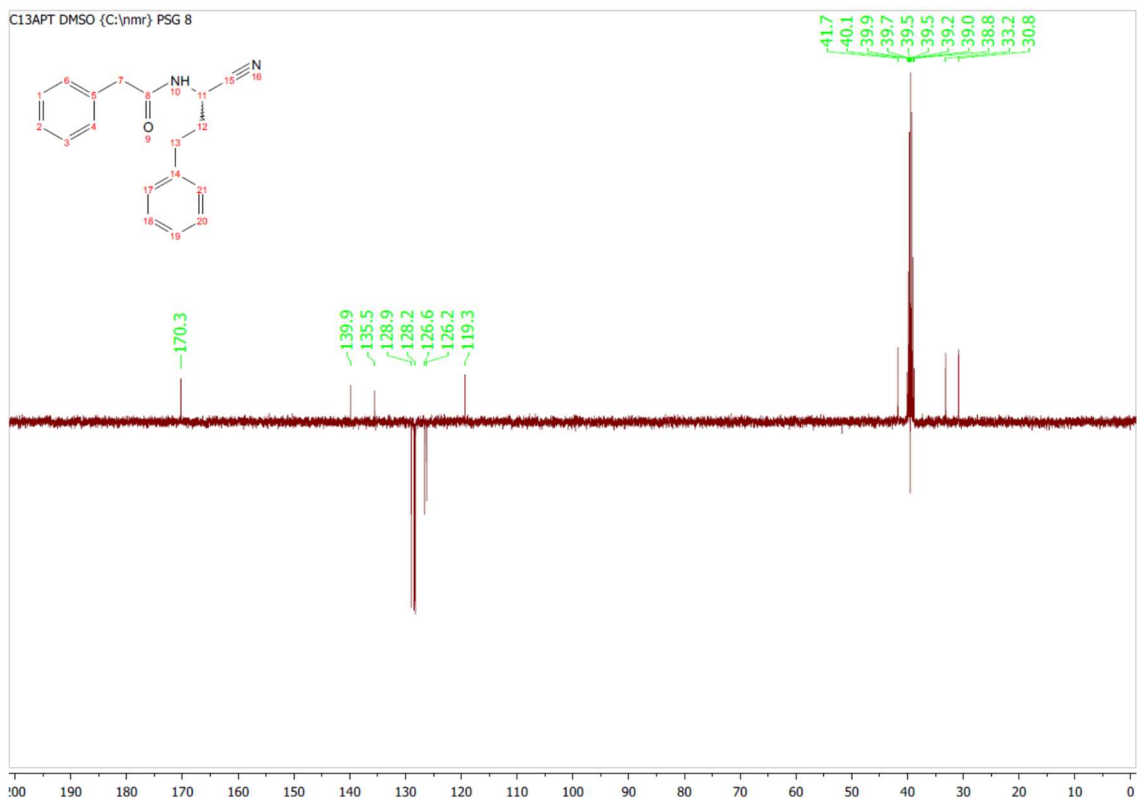

Figure S.22 – APT compound (11) in DMSO-d6.

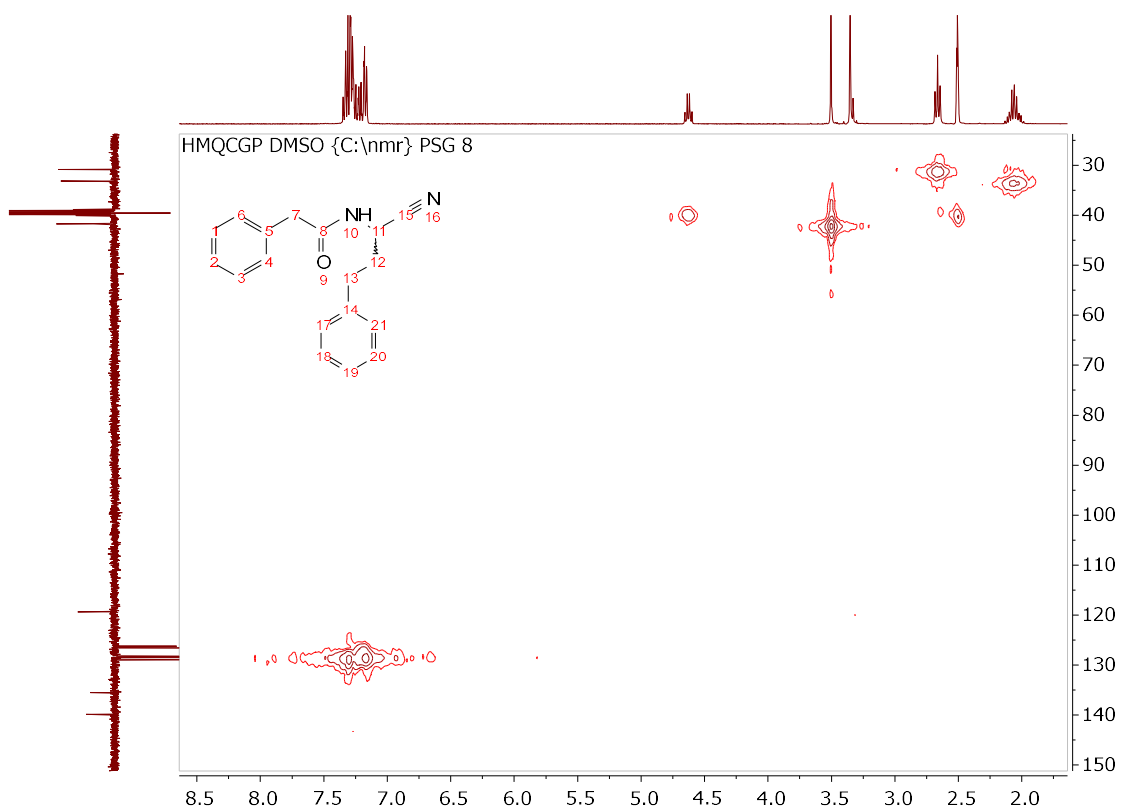

Figure S.23 – HMQC compound (11) in DMSO-d6.

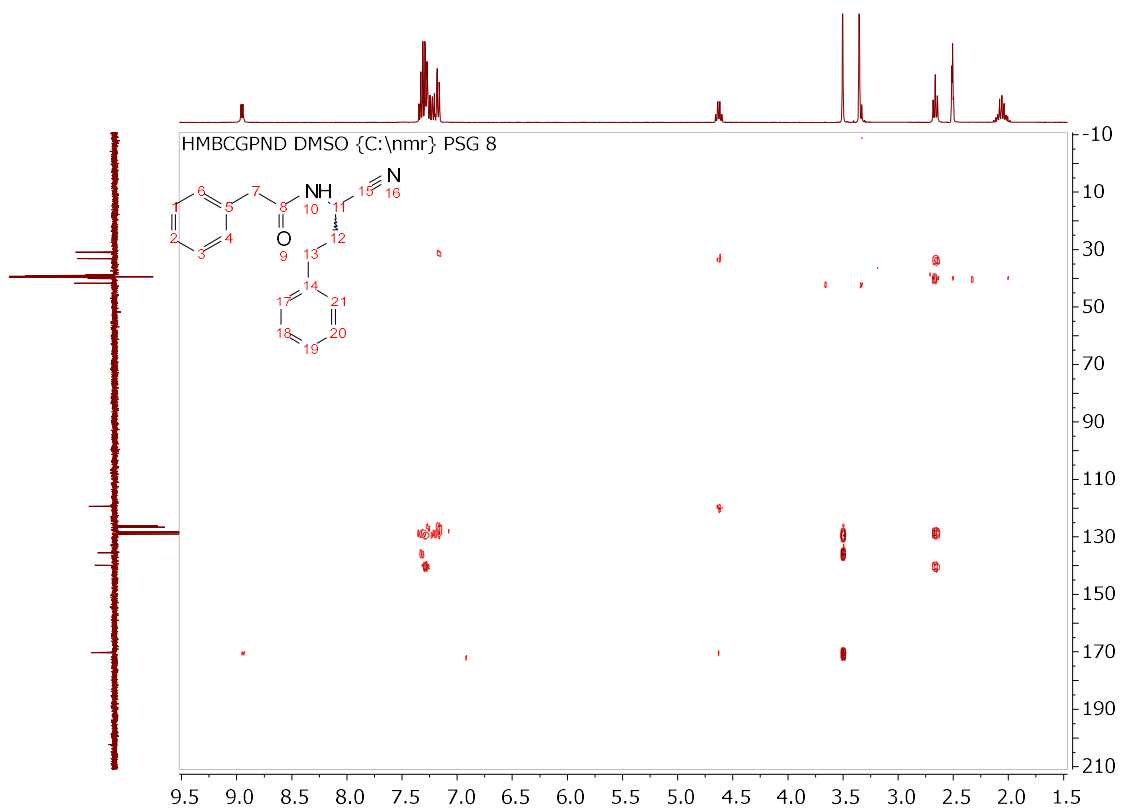

Figure S.24 – HMBC compound (11) in DMSO-d6.



## Compound (12)

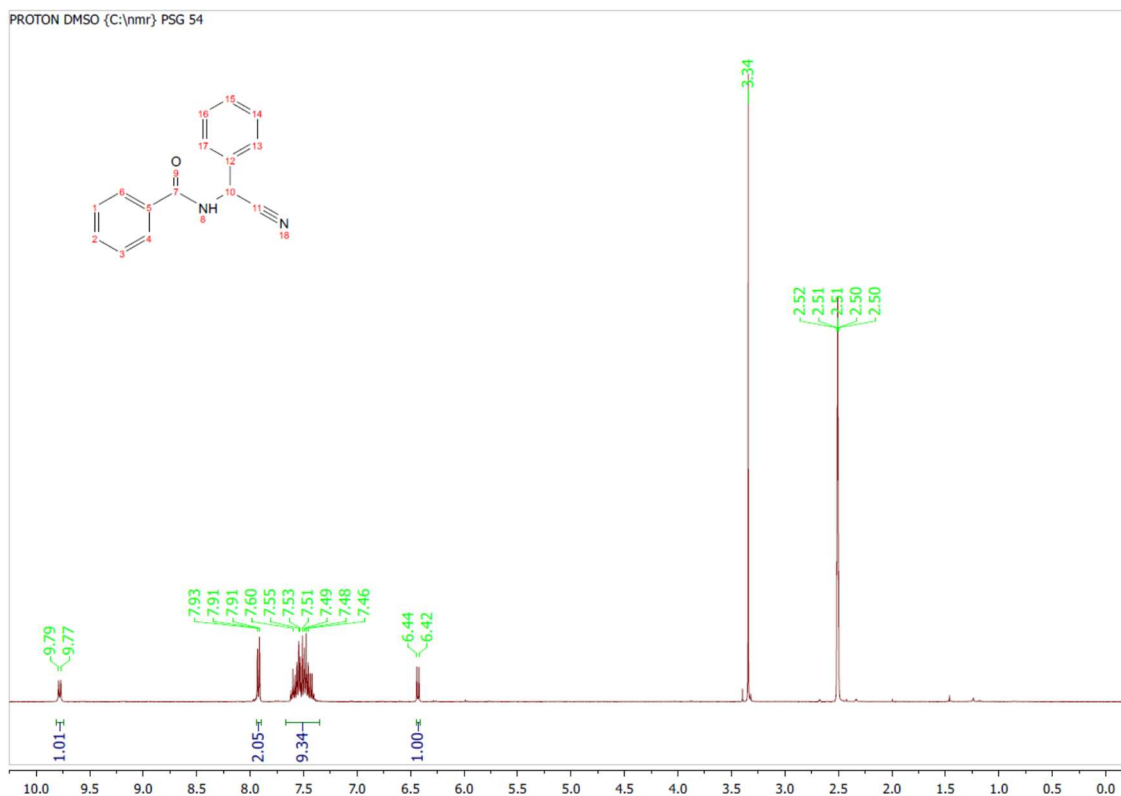

Figure S.25 –  $^1\text{H}$ NMR compound (12) in DMSO- $d_6$ .

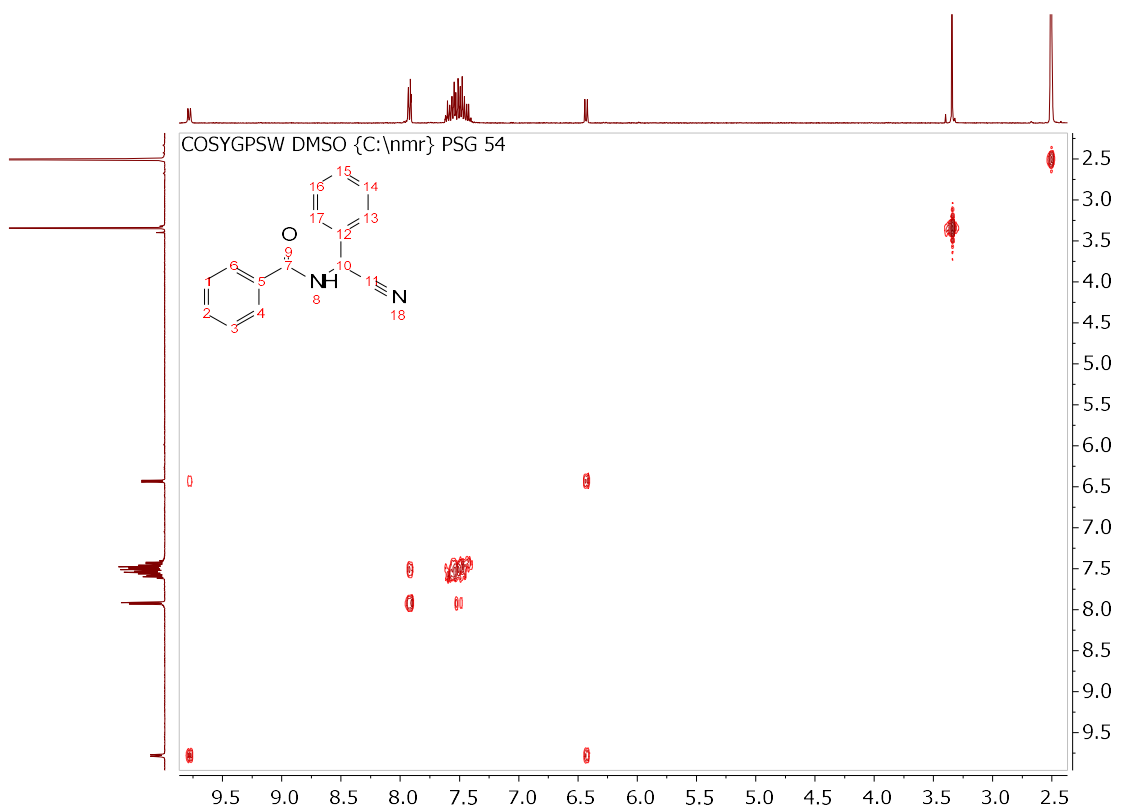

Figure S.26 – COSY compound (12) in DMSO- $d_6$ .

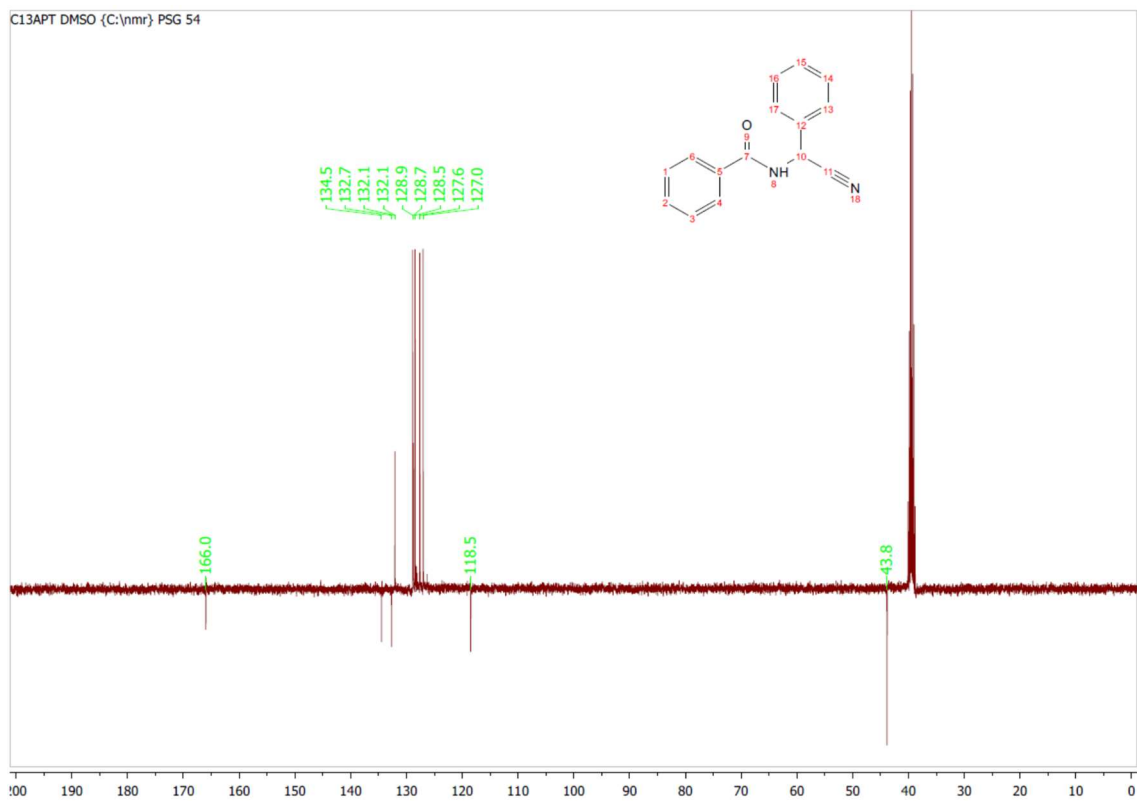

Figure S.27 – APT compound (12) in DMSO-d6.

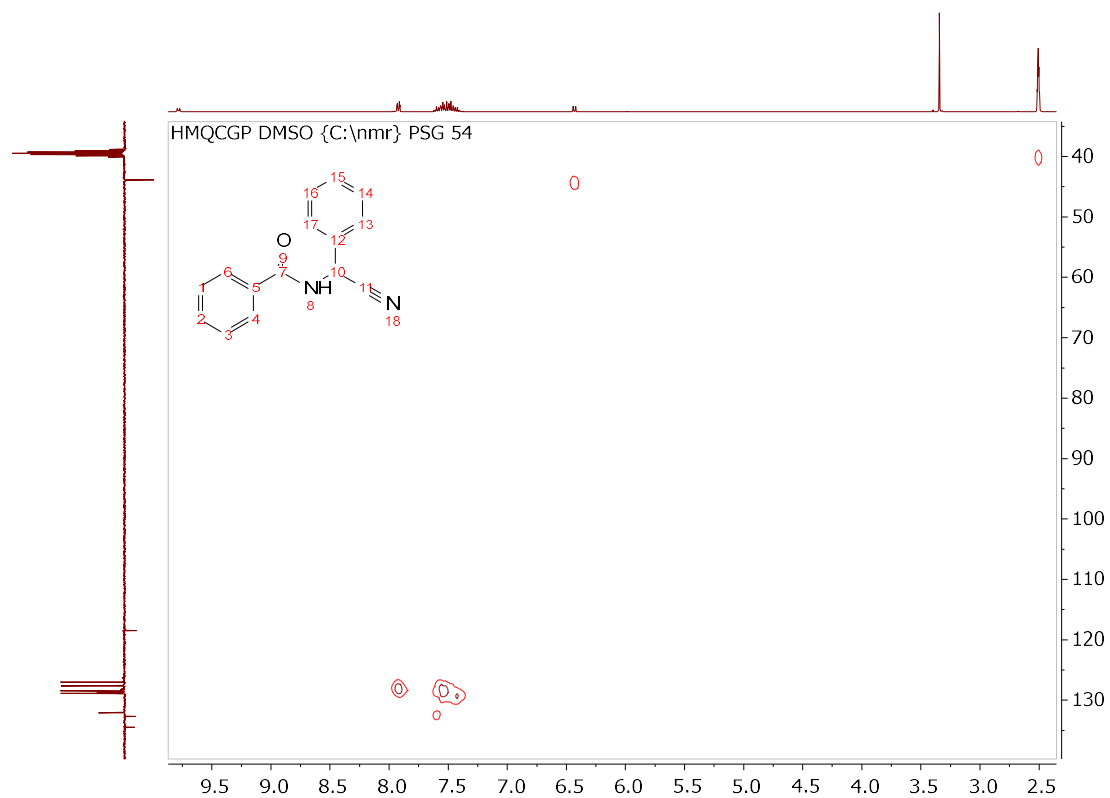

Figure S.28 – HMQC compound (12) in DMSO-d6.

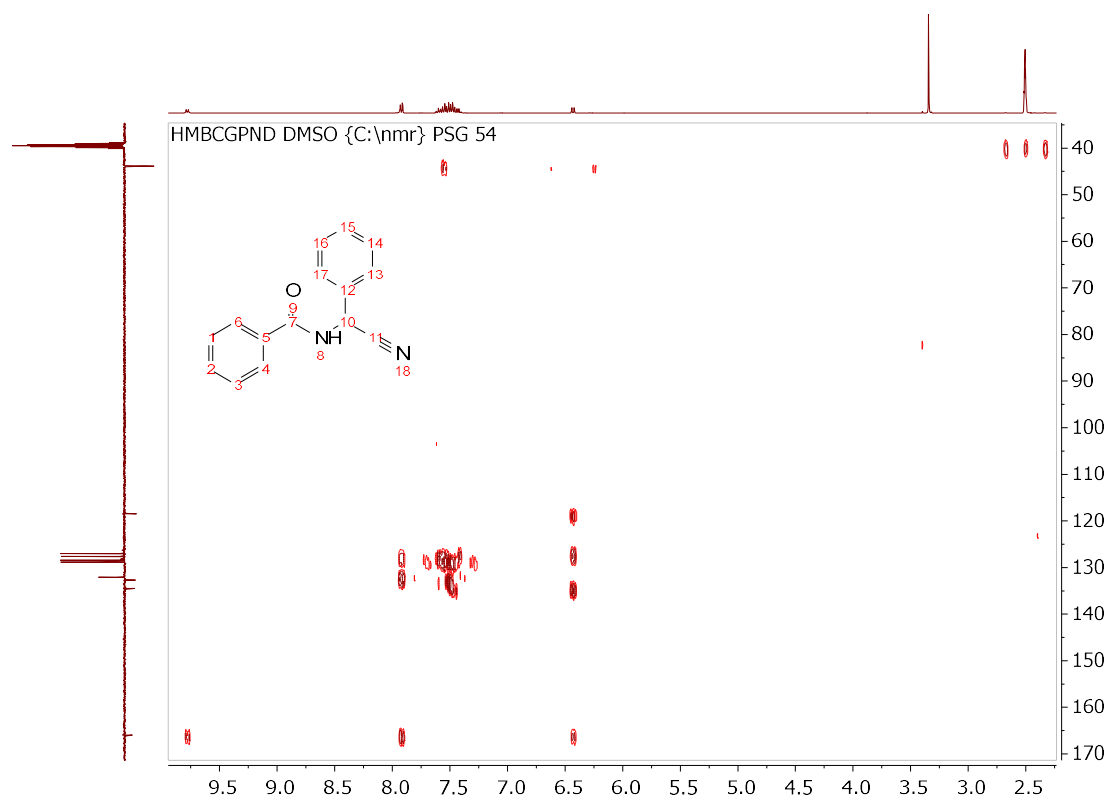

Figure S.29 – HMBC compound **(12)** in DMSO-d<sub>6</sub>.

Compound **(13)**

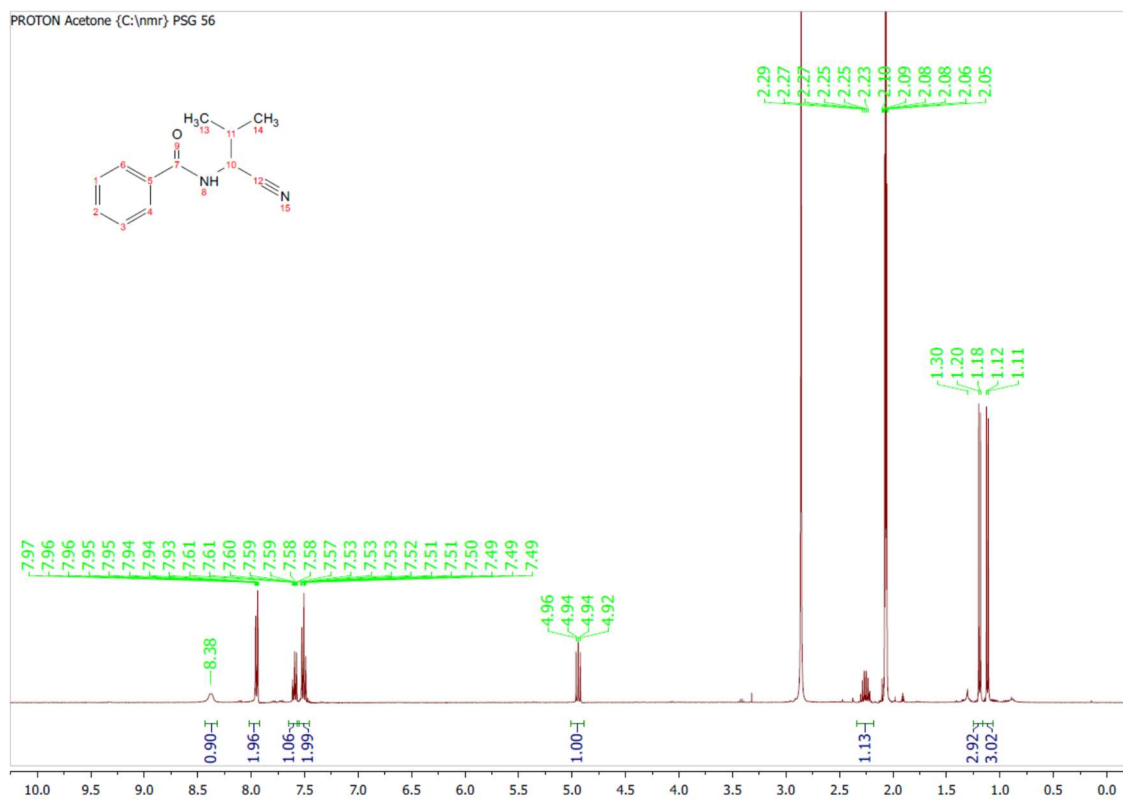

Figure S.30 – HNMR compound **(13)** in Acetone-d<sub>6</sub>.

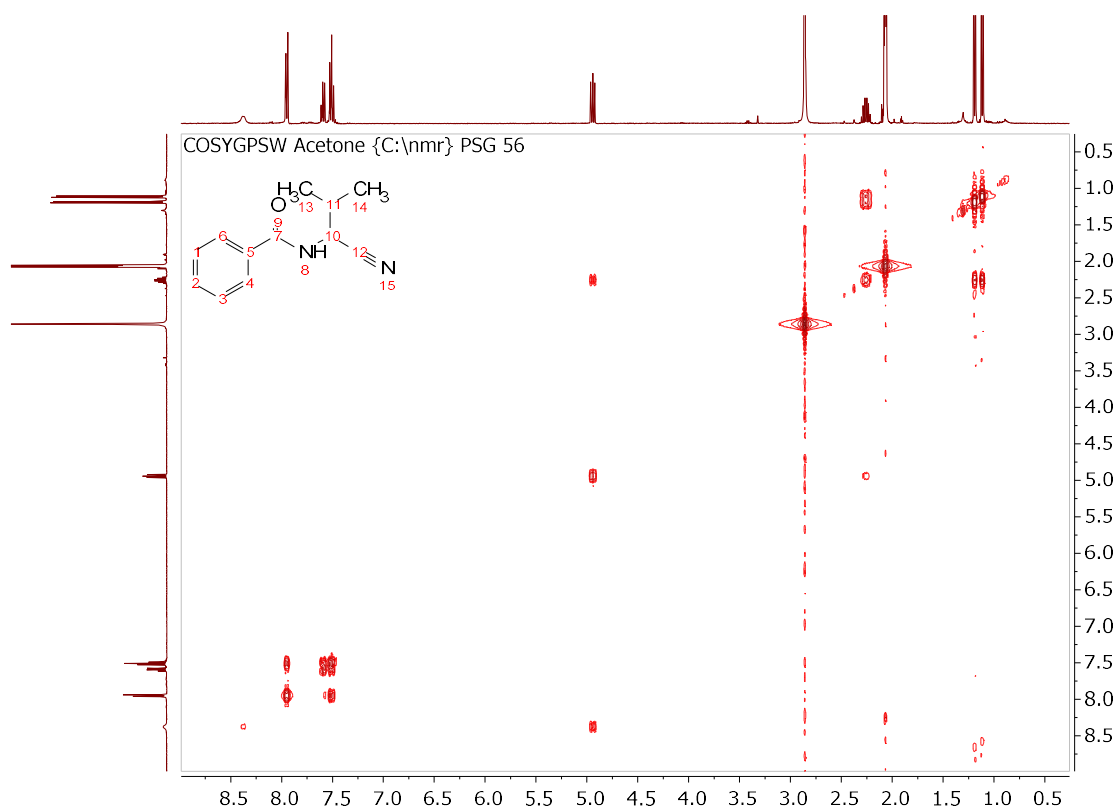

Figure S.31 – COSY compound (**13**) in Acetone-d<sub>6</sub>.

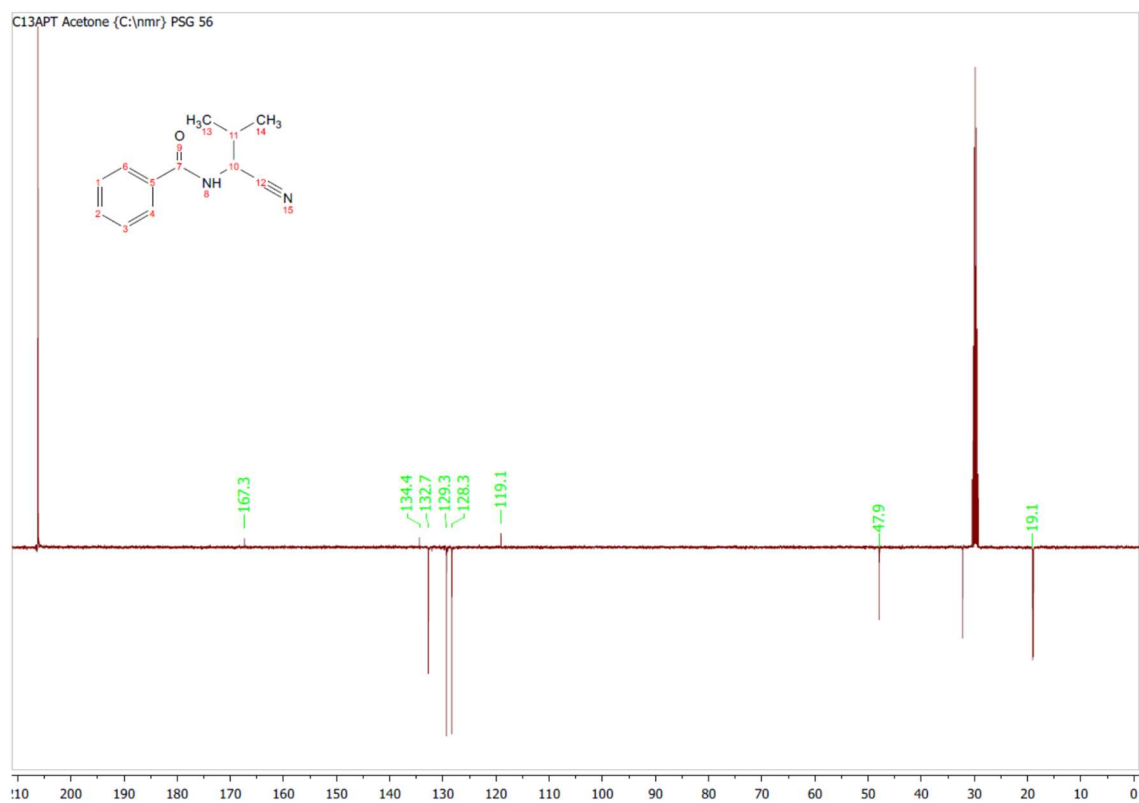

Figure S.32 – APT compound (**13**) in Acetone-d<sub>6</sub>.

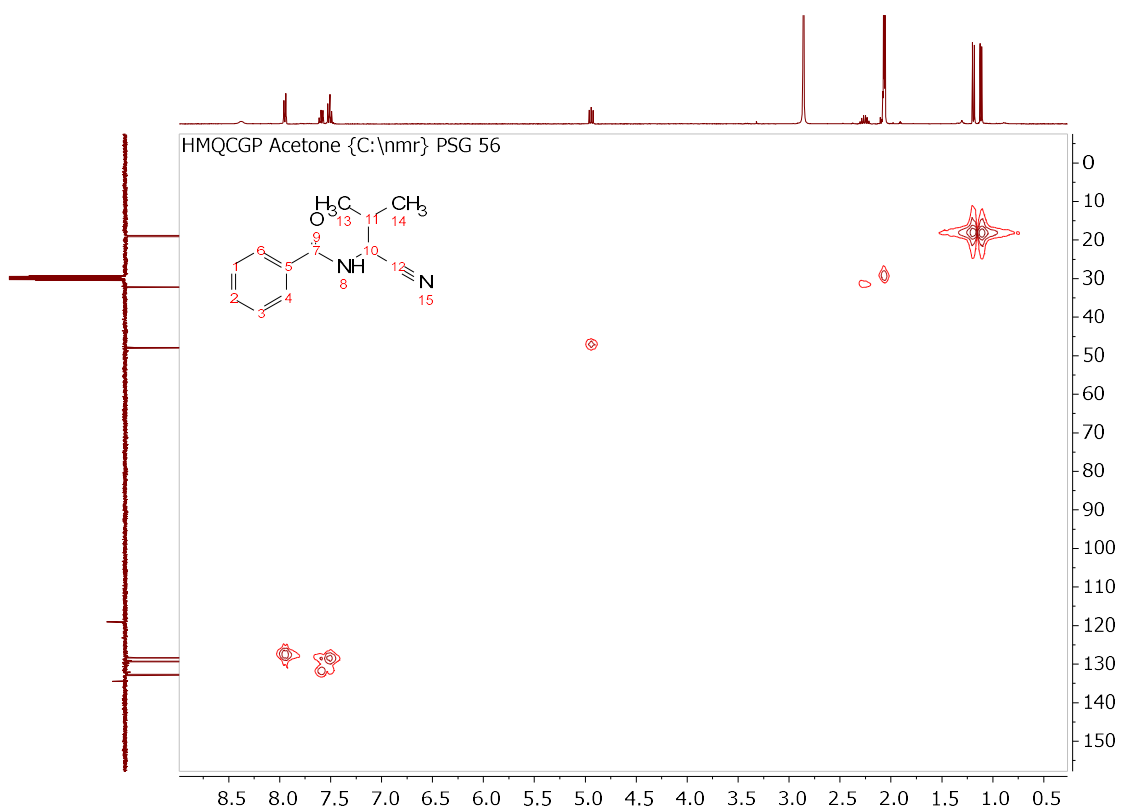

Figure S.33 – HMQC compound (13) in Acetone-d6.

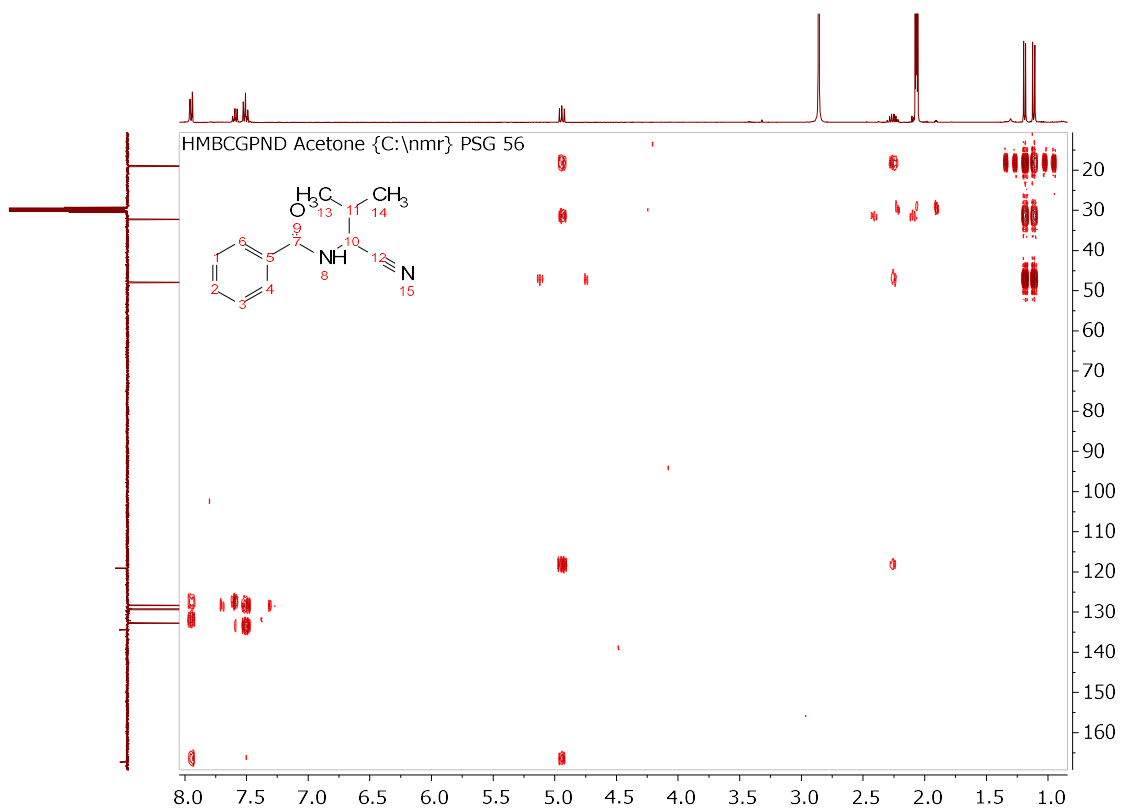

Figure S.34 – HMBC compound (13) in Acetone-d6.

### Compound (14)

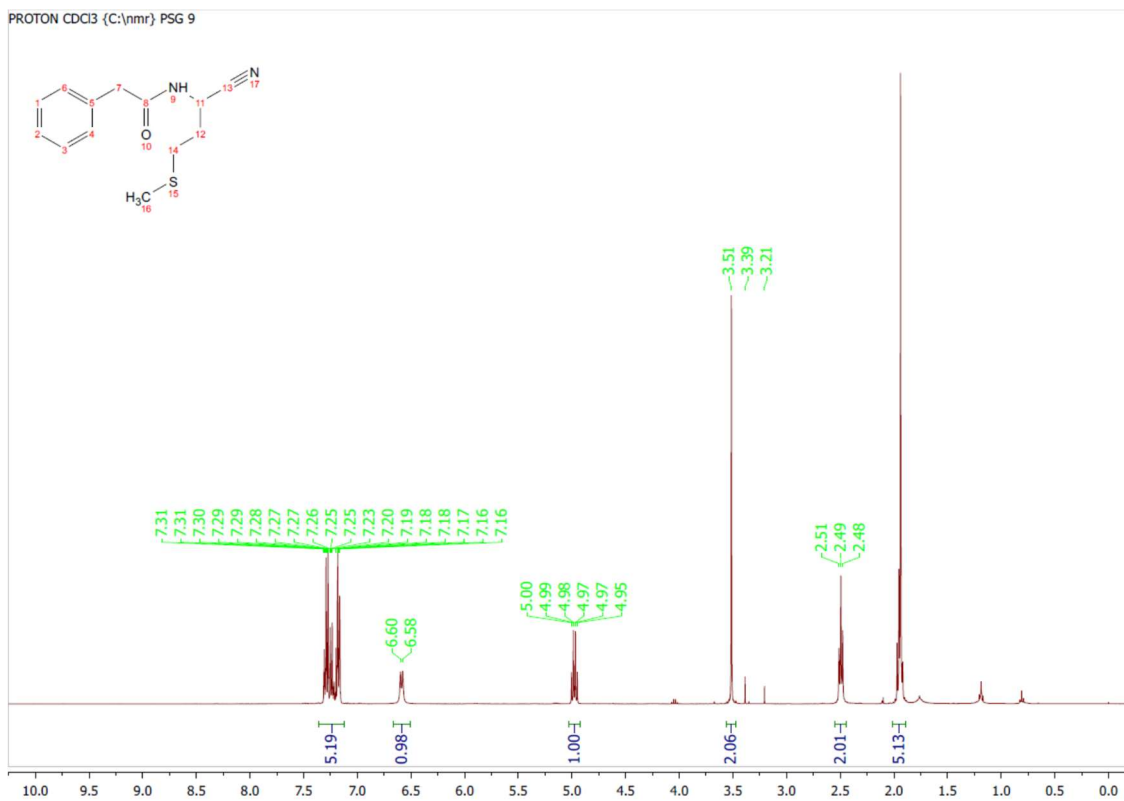

Figure S.35 – <sup>1</sup>H NMR compound (14) in CDCl<sub>3</sub>.

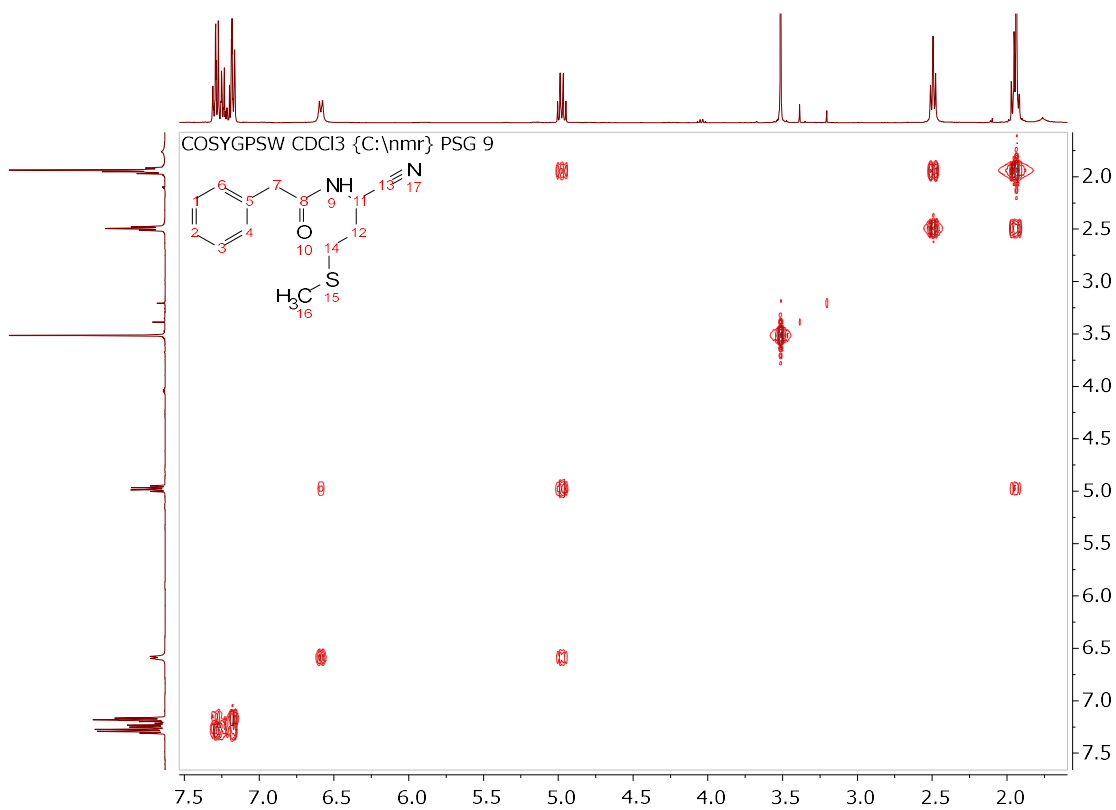

Figure S.36 – COSY compound (14) in CDCl<sub>3</sub>.

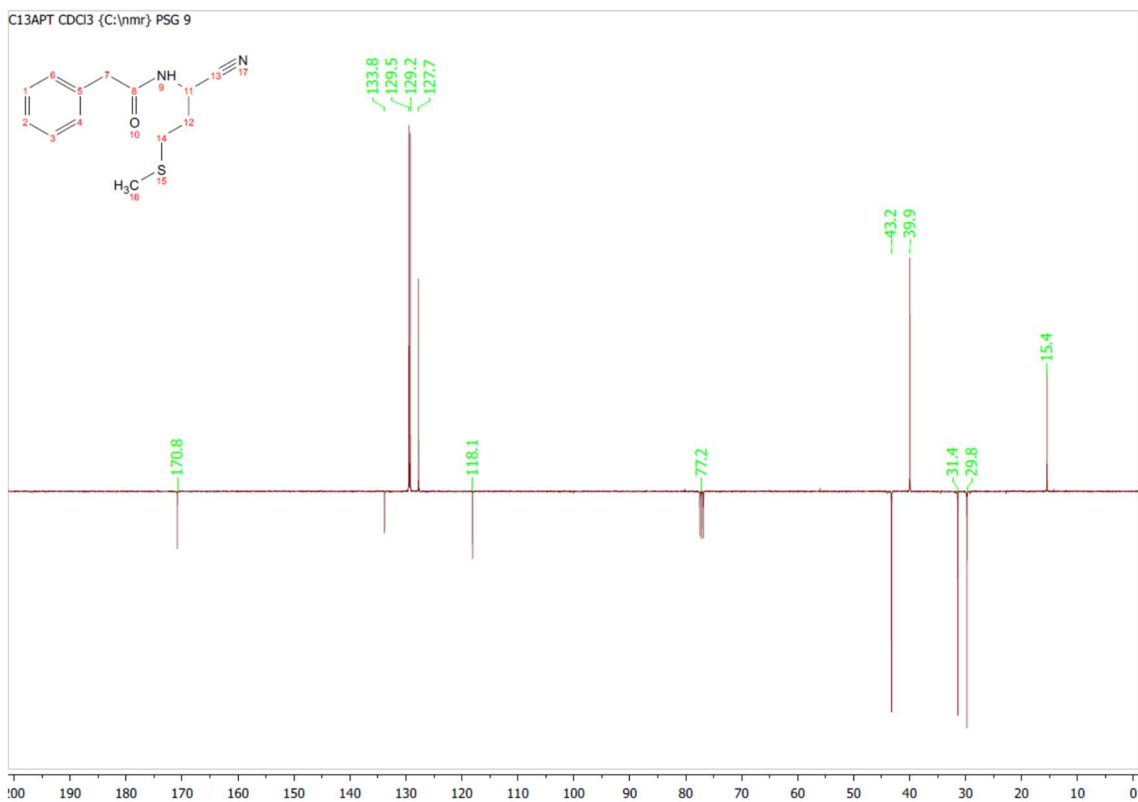

Figure S.37 – APT compound (**14**) in CDCl<sub>3</sub>.

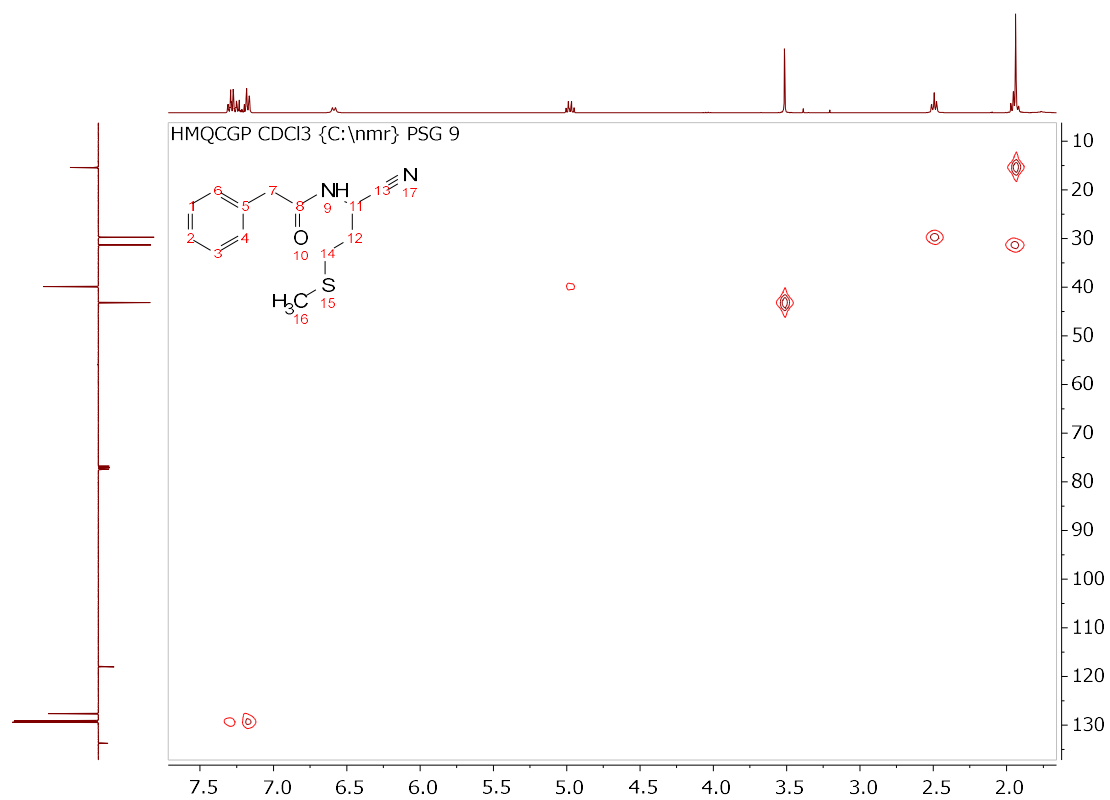

Figure S.38 – HMQC compound (**14**) in CDCl<sub>3</sub>.

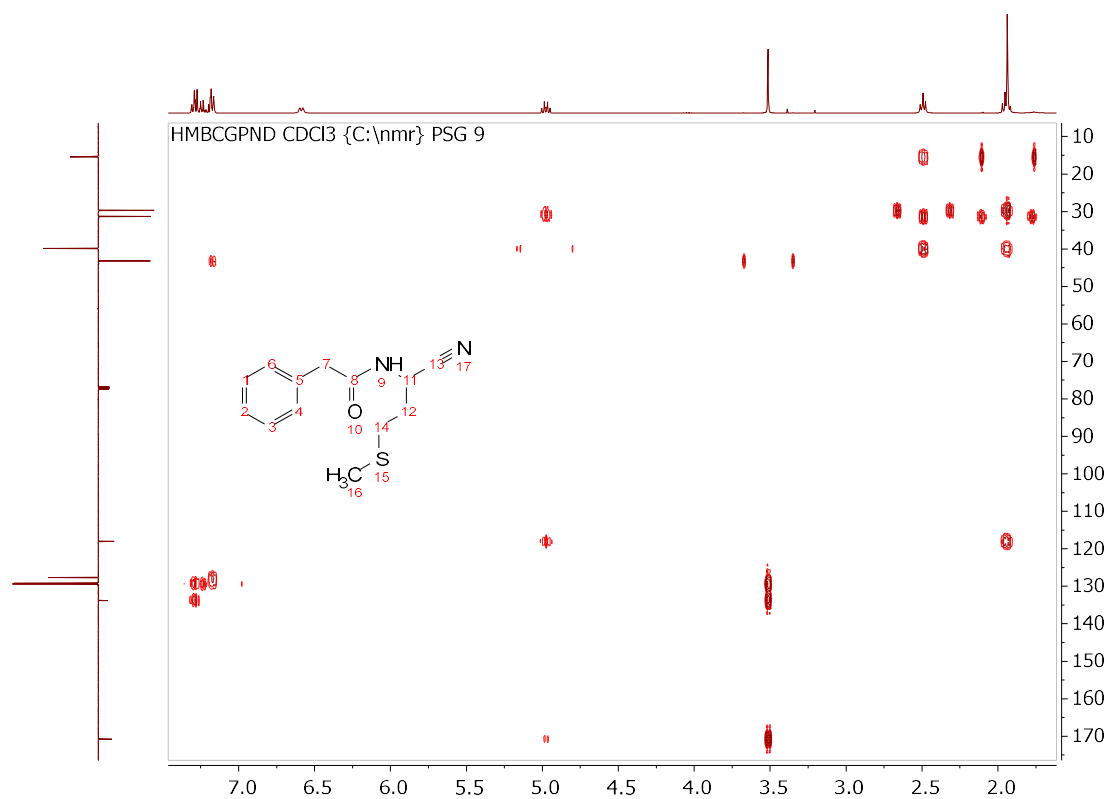

Figure S.39 – HMBC compound (14) in CDCl<sub>3</sub>.

Compound (15)

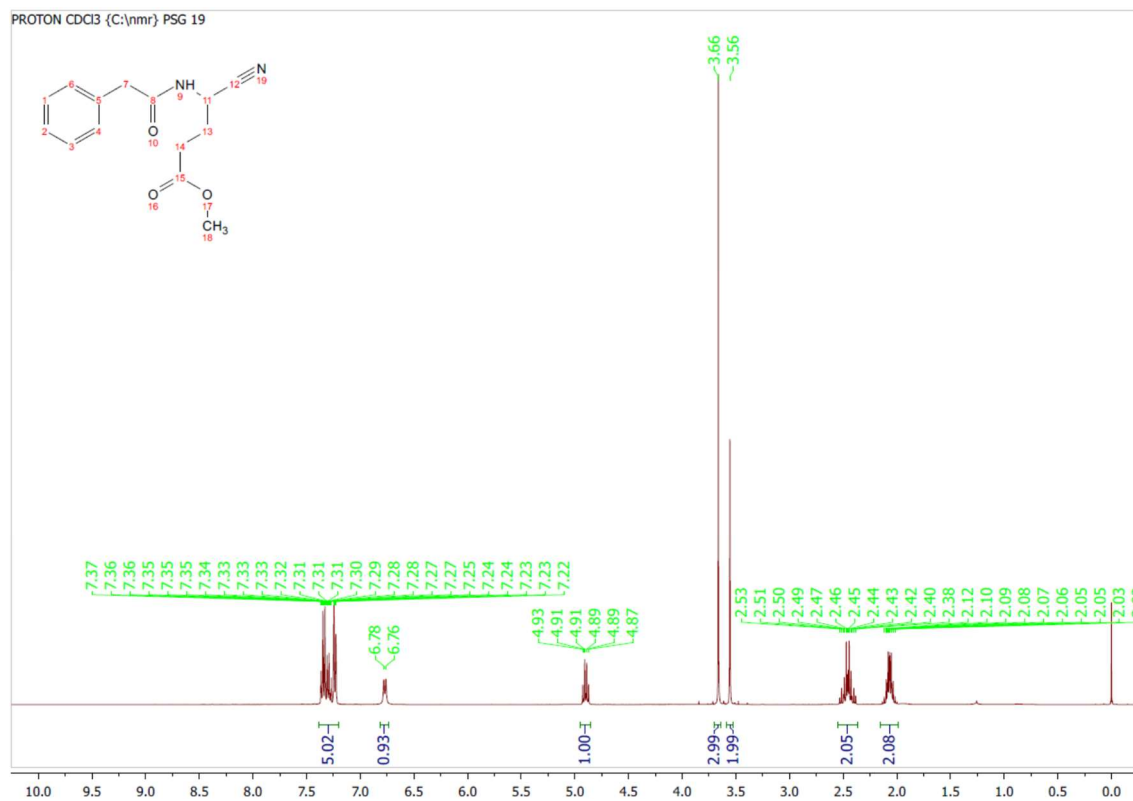

Figure S.40 – <sup>1</sup>H NMR compound (15) in CDCl<sub>3</sub>.



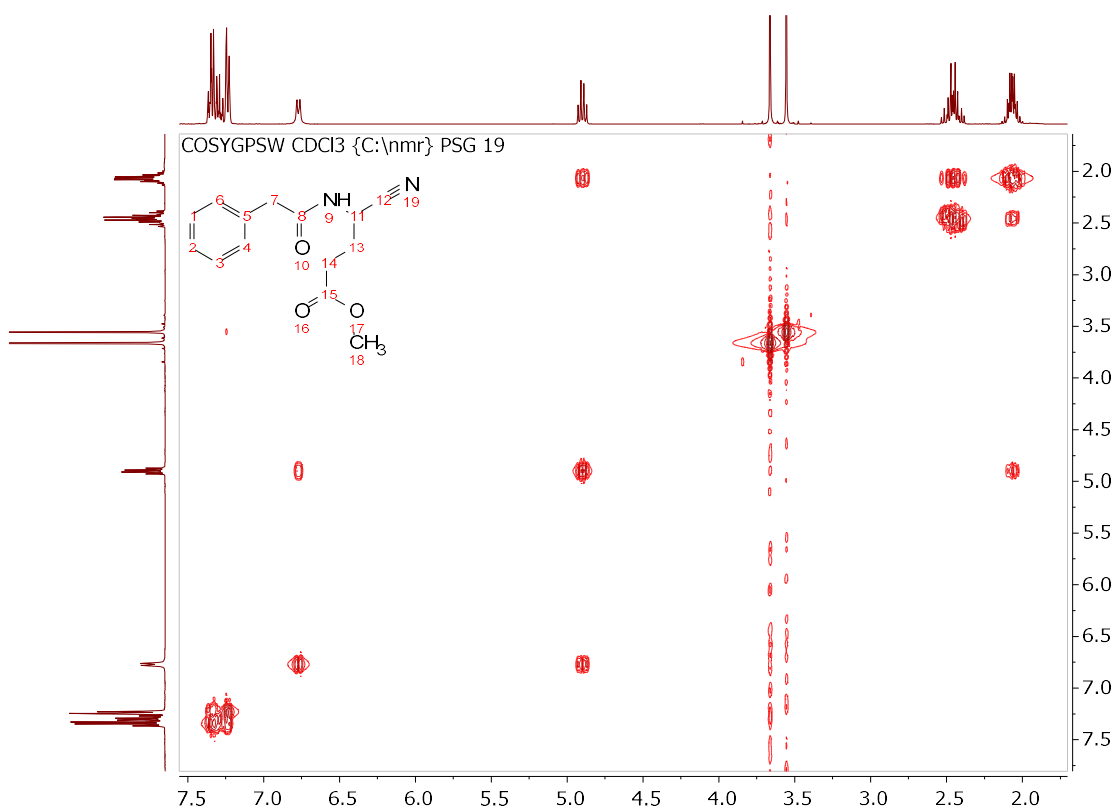

Figure S.41 – COSY compound (15) in CDCl<sub>3</sub>.

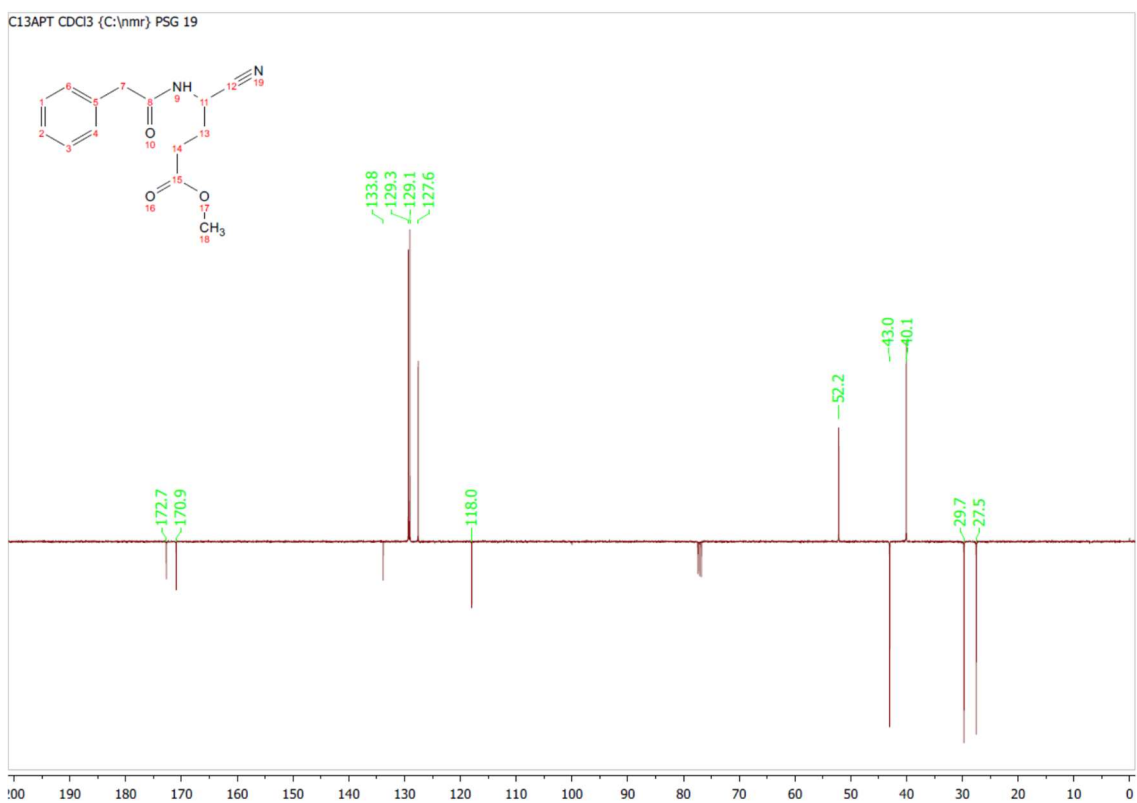

Figure S.42 – APT compound (15) in CDCl<sub>3</sub>.

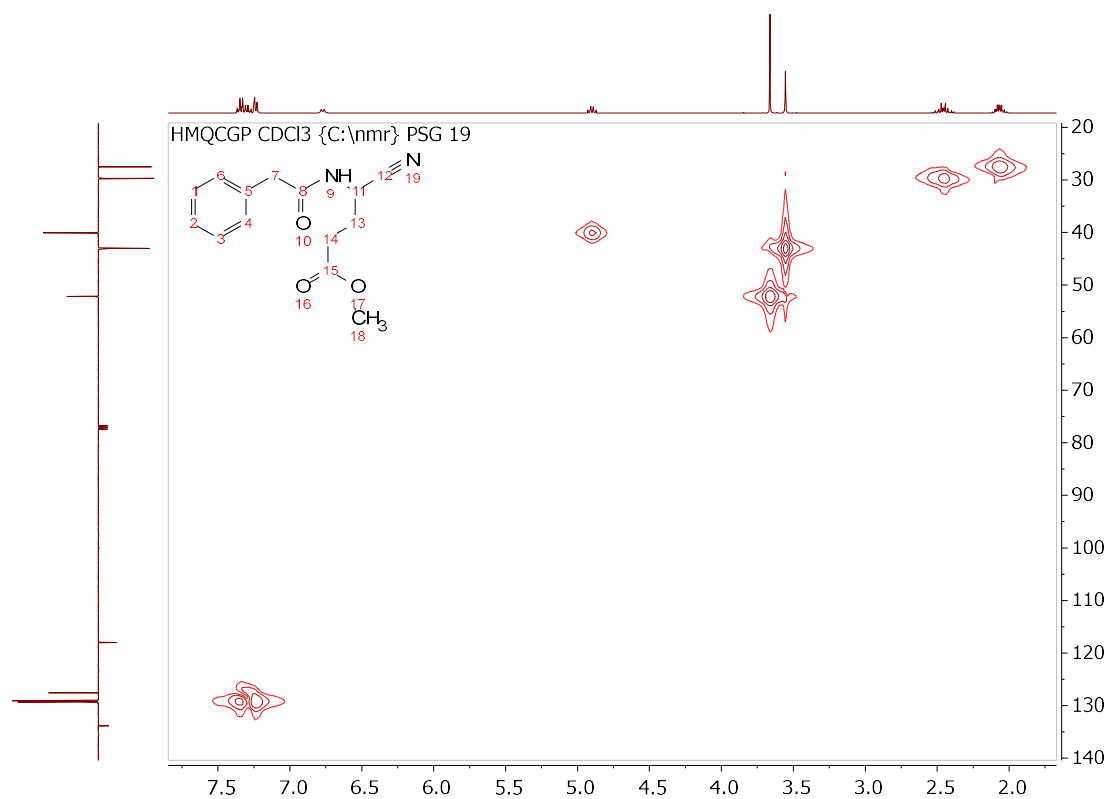

Figure S.43 – HMQC compound (15) in CDCl<sub>3</sub>.

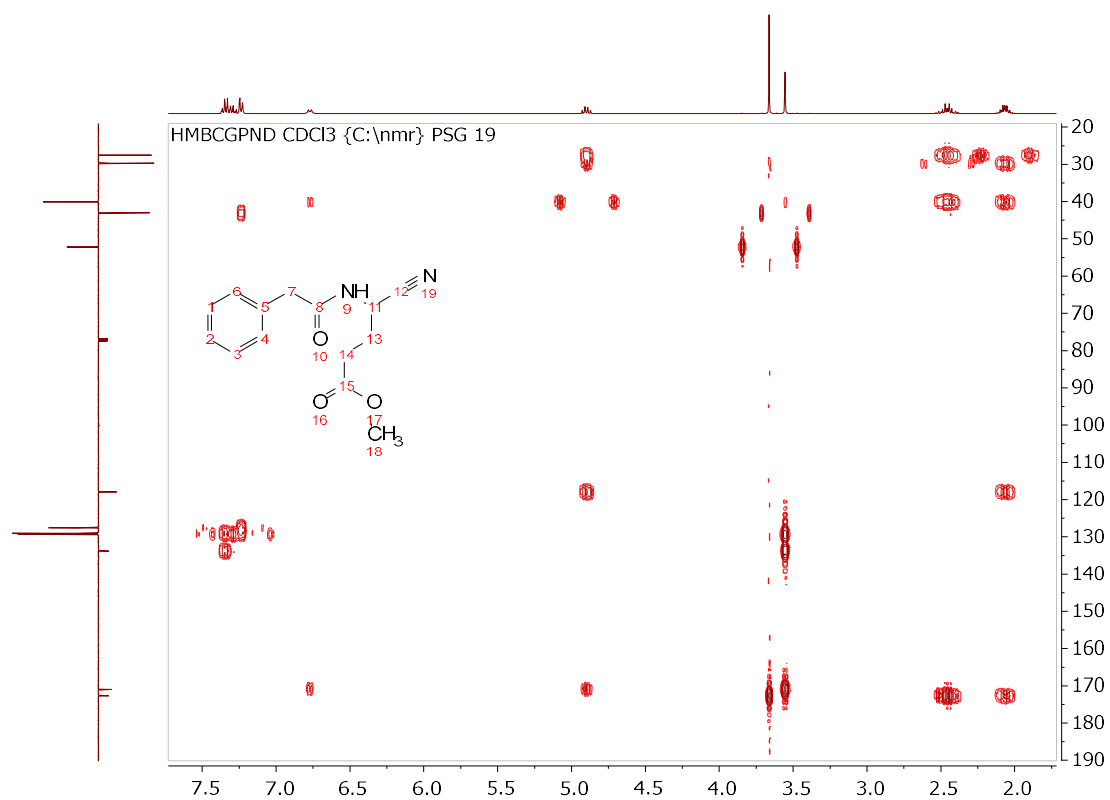

Figure S.44 – HMBC compound (15) in CDCl<sub>3</sub>.

### Compound (16)

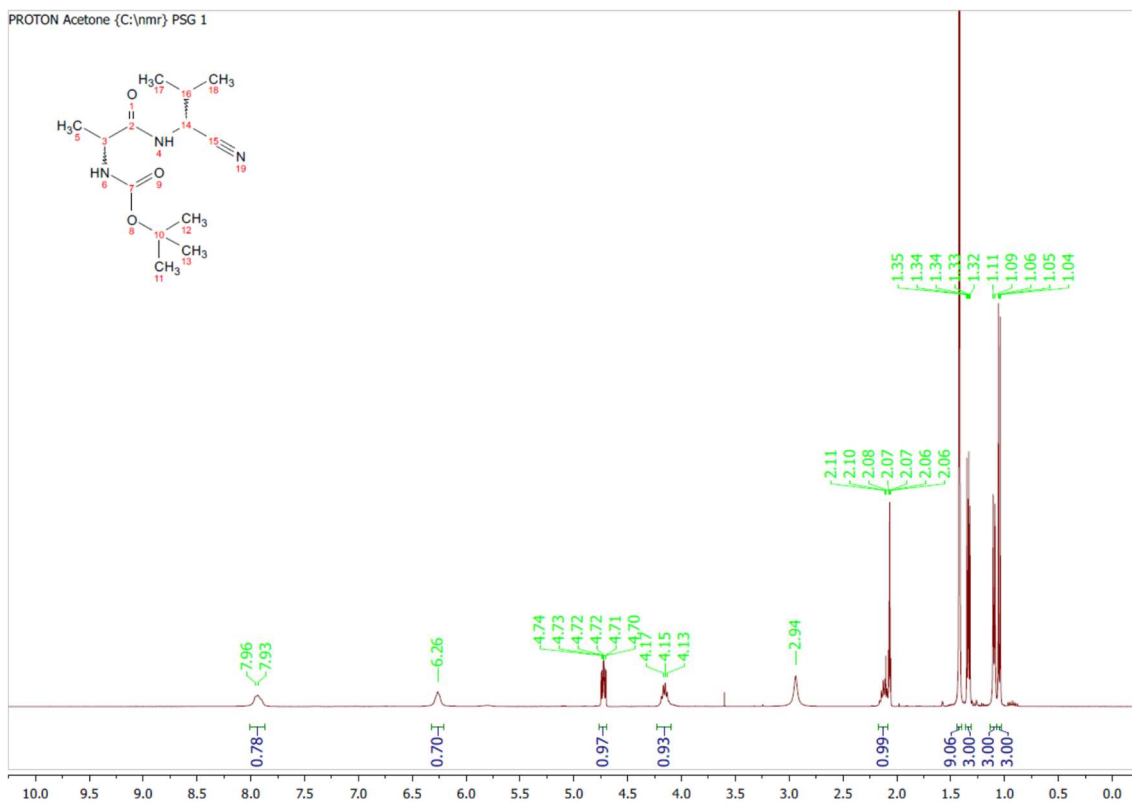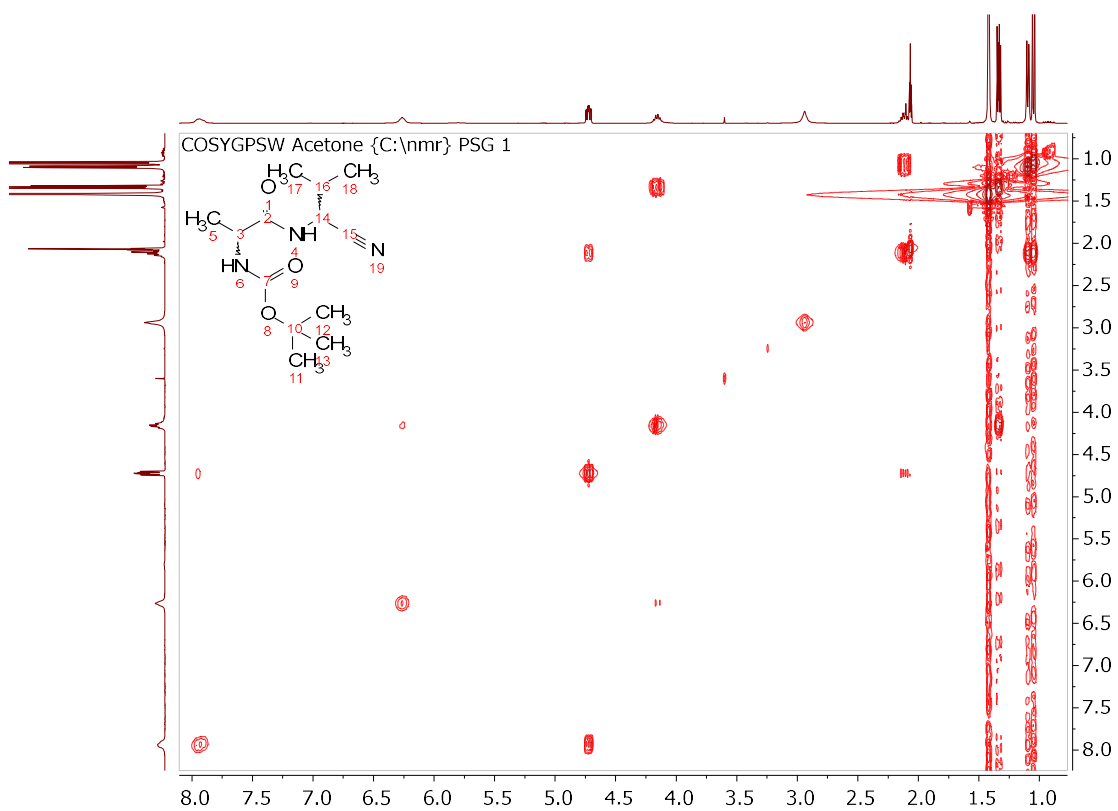

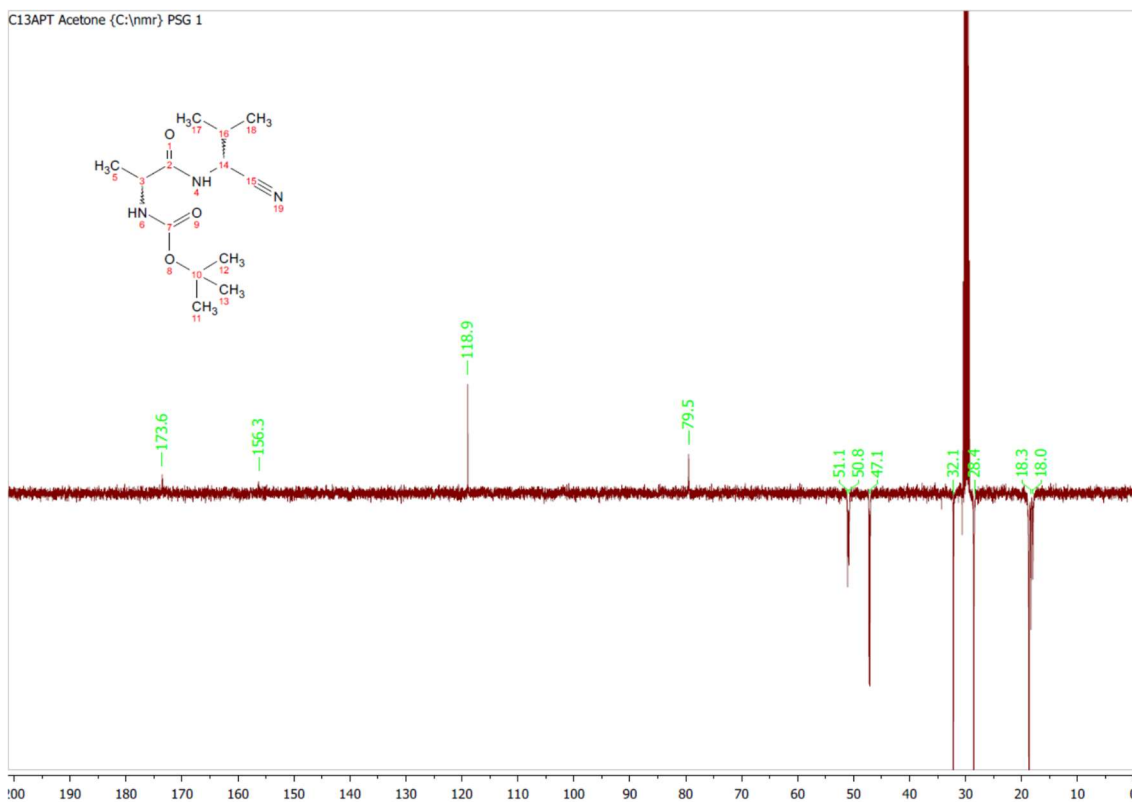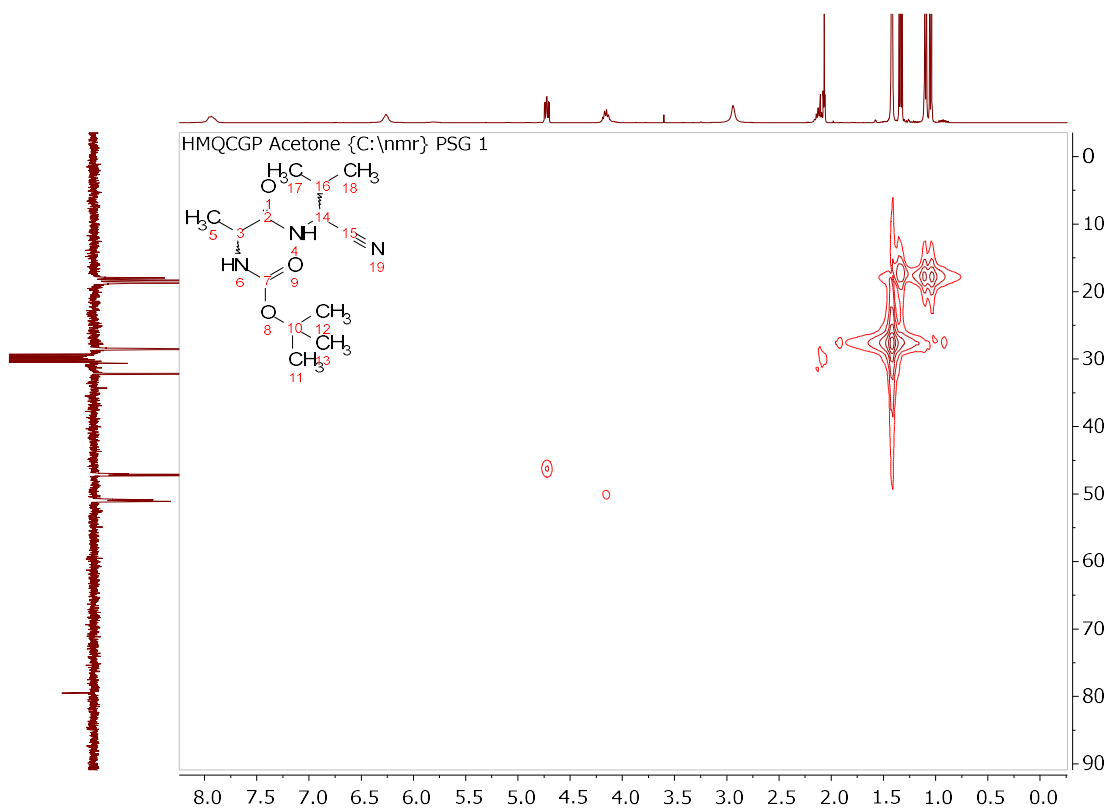

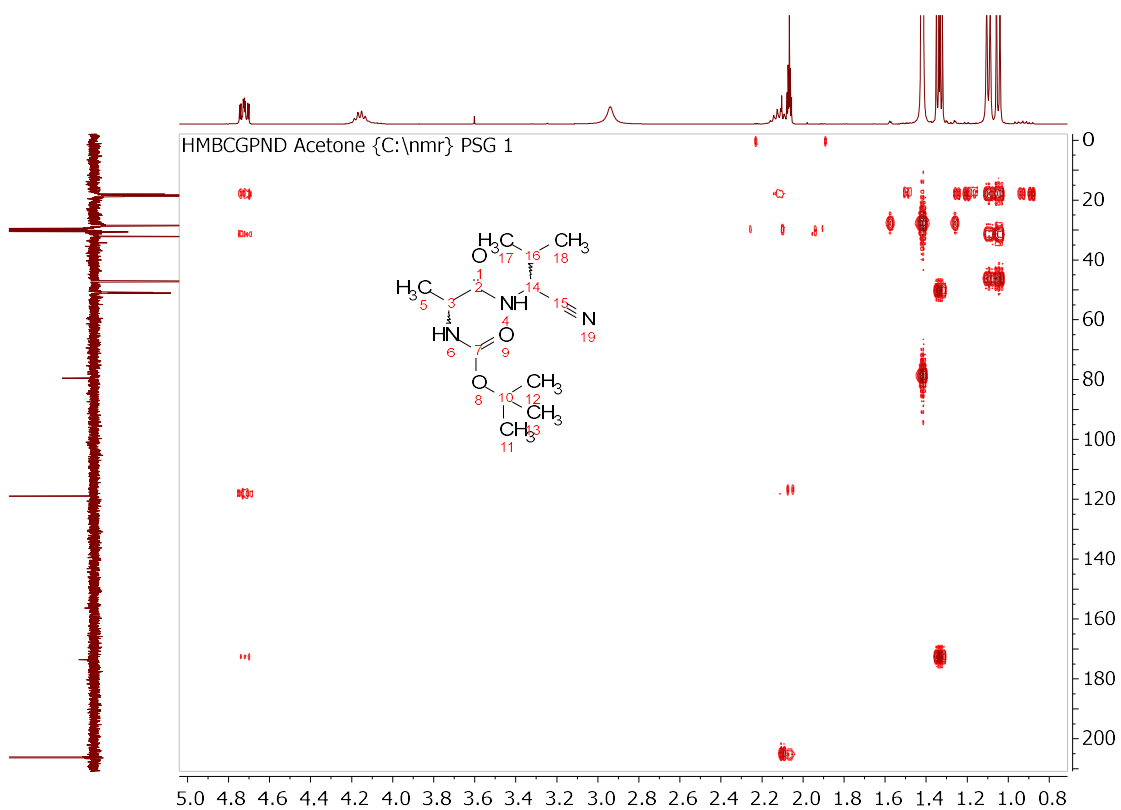

Figure S.49 – HMBC compound **(16)** in Acetone-d<sub>6</sub>.

Compound **(17)**

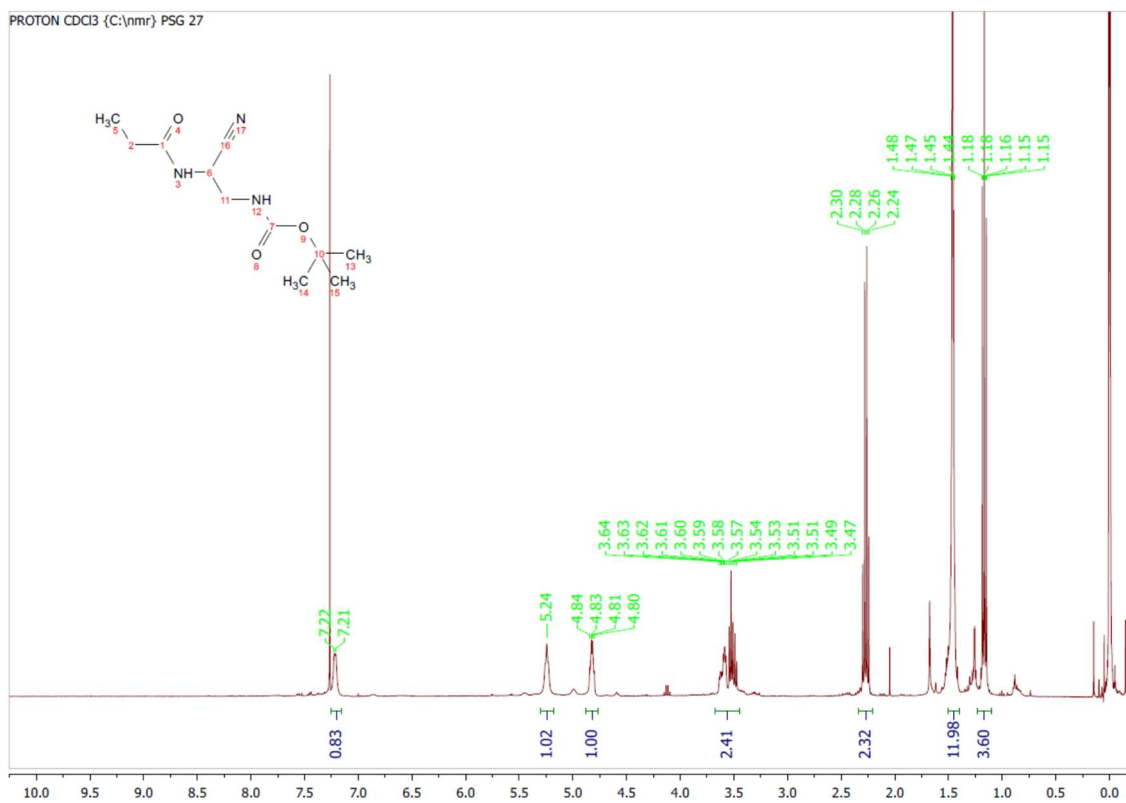

Figure S.50 – <sup>1</sup>H NMR compound **(17)** in CDCl<sub>3</sub>.



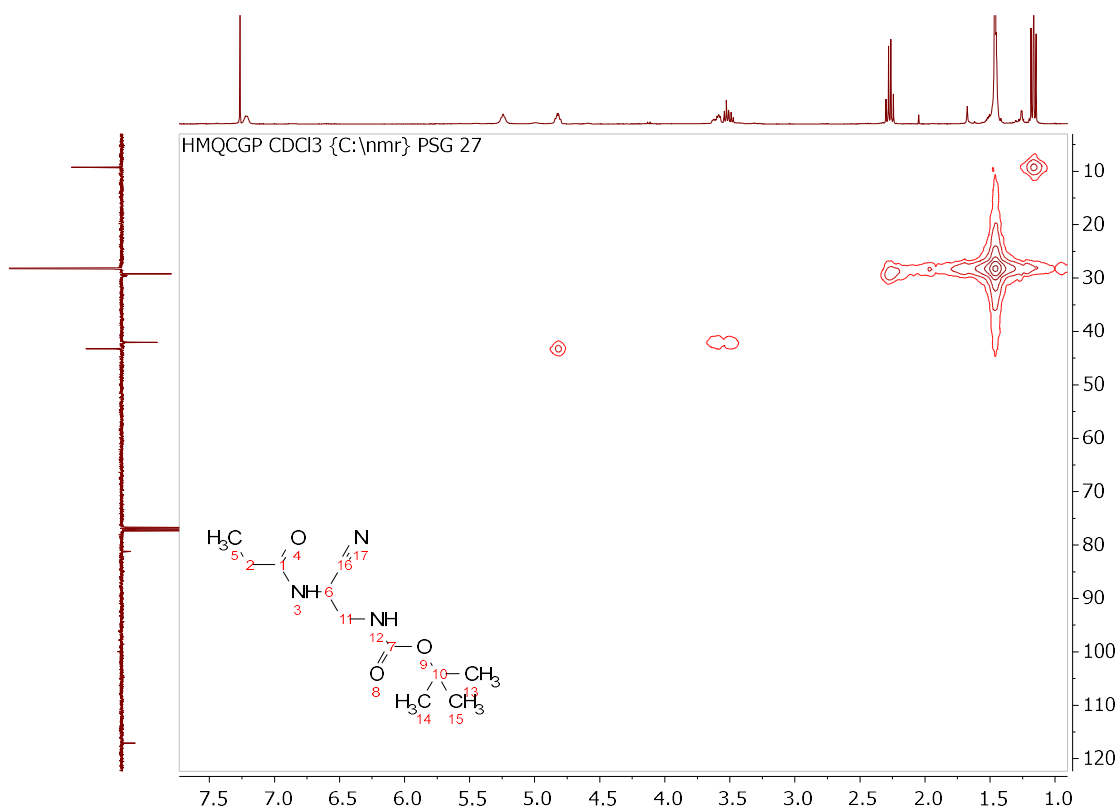

Figure S.53 – HMBC compound **(17)** in CDCl<sub>3</sub>.

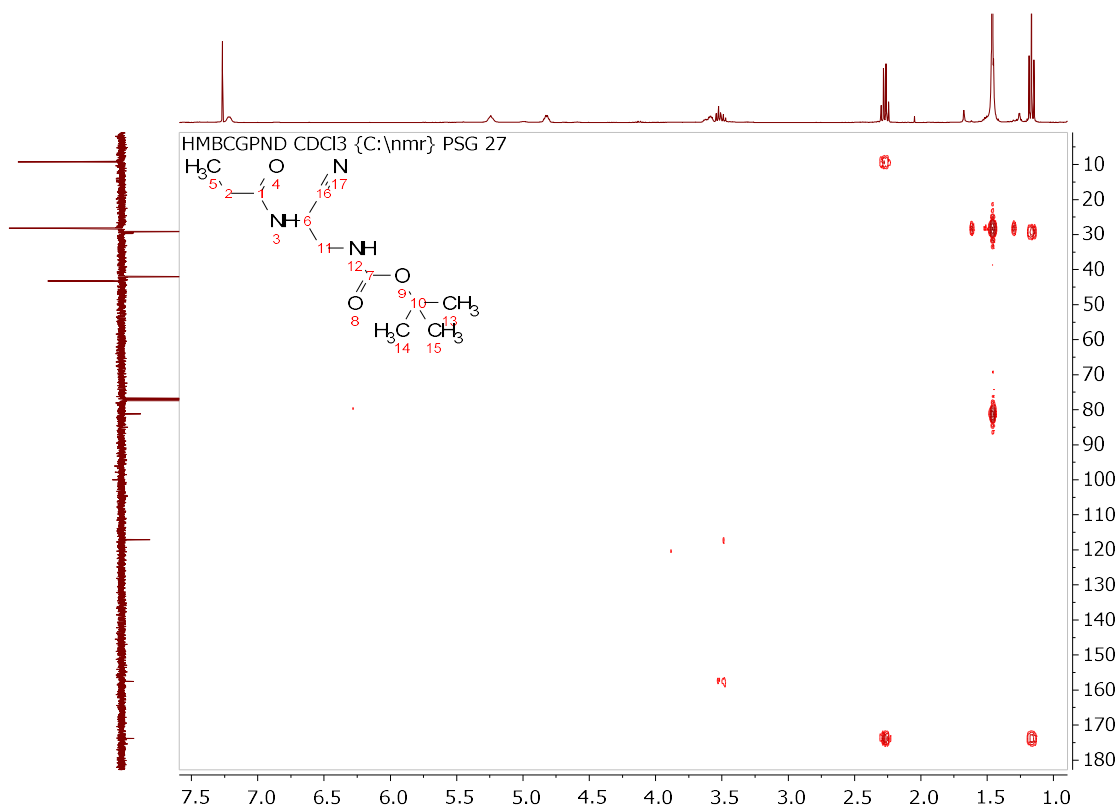

Figure S.54 – HMBC compound **(17)** in CDCl<sub>3</sub>.

### Compound (18)

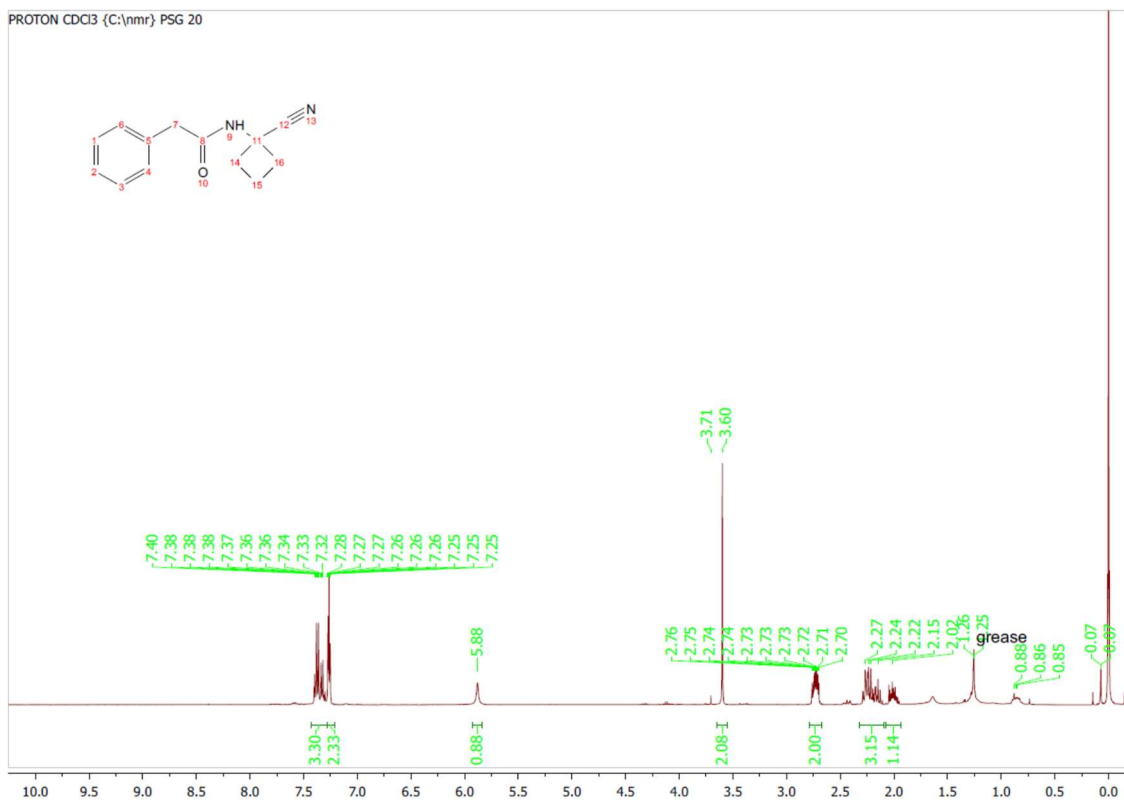

Figure S.55 – <sup>1</sup>H NMR compound (18) in CDCl<sub>3</sub>.

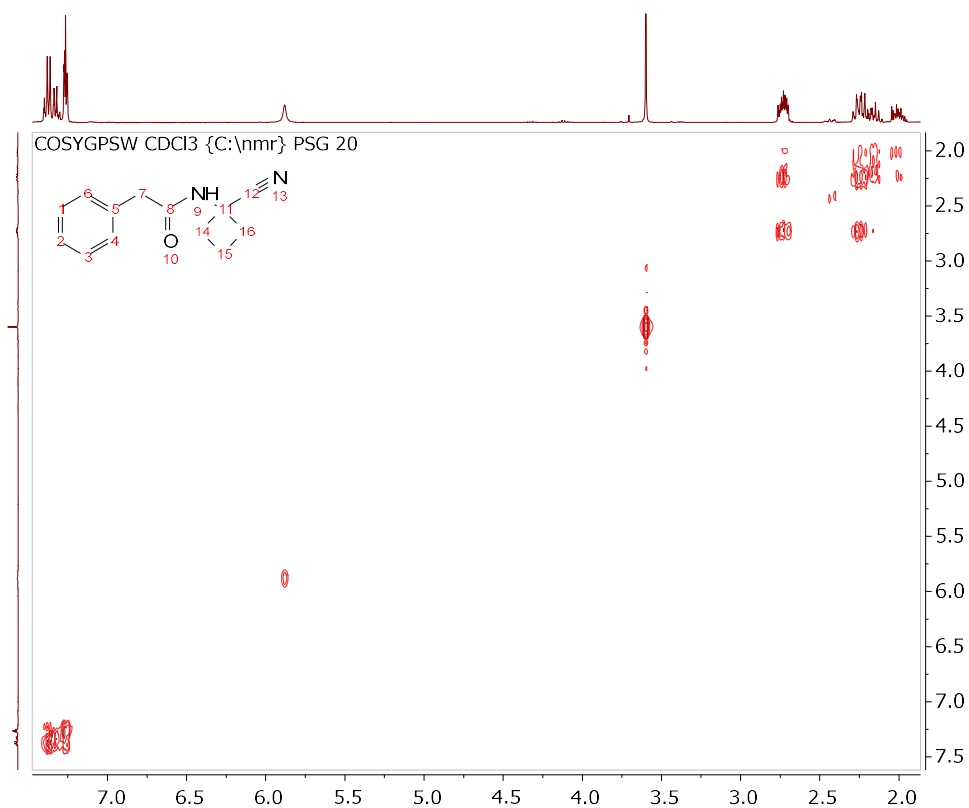

Figure S.56 – COSY compound (18) in CDCl<sub>3</sub>.



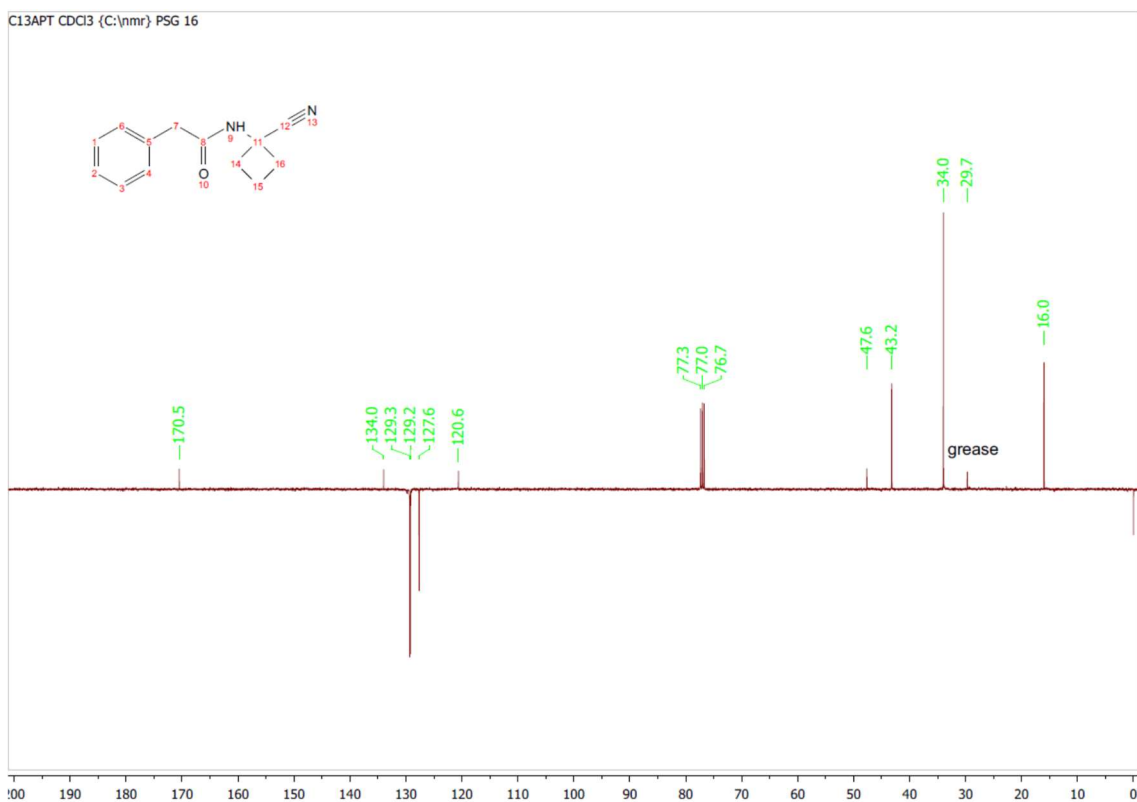

Figure S.57 – APT compound **(18)** in CDCl<sub>3</sub>.

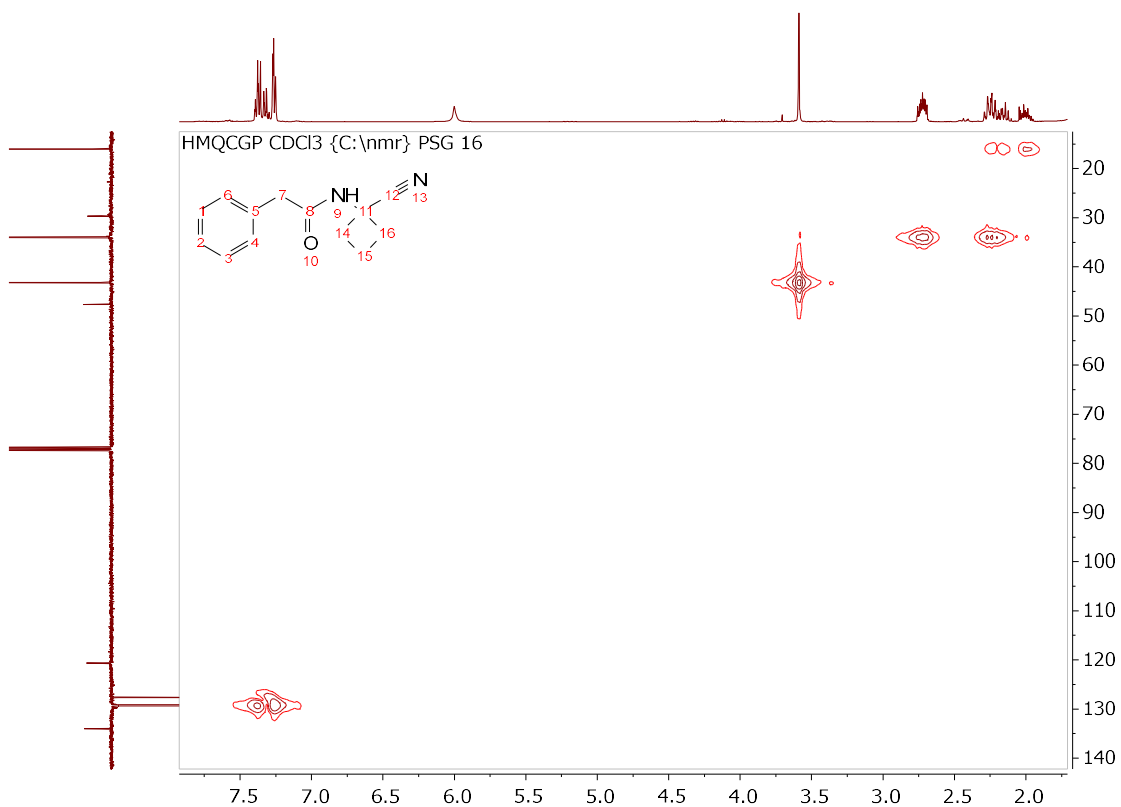

Figure S.58 – HMQC compound **(18)** in CDCl<sub>3</sub>.

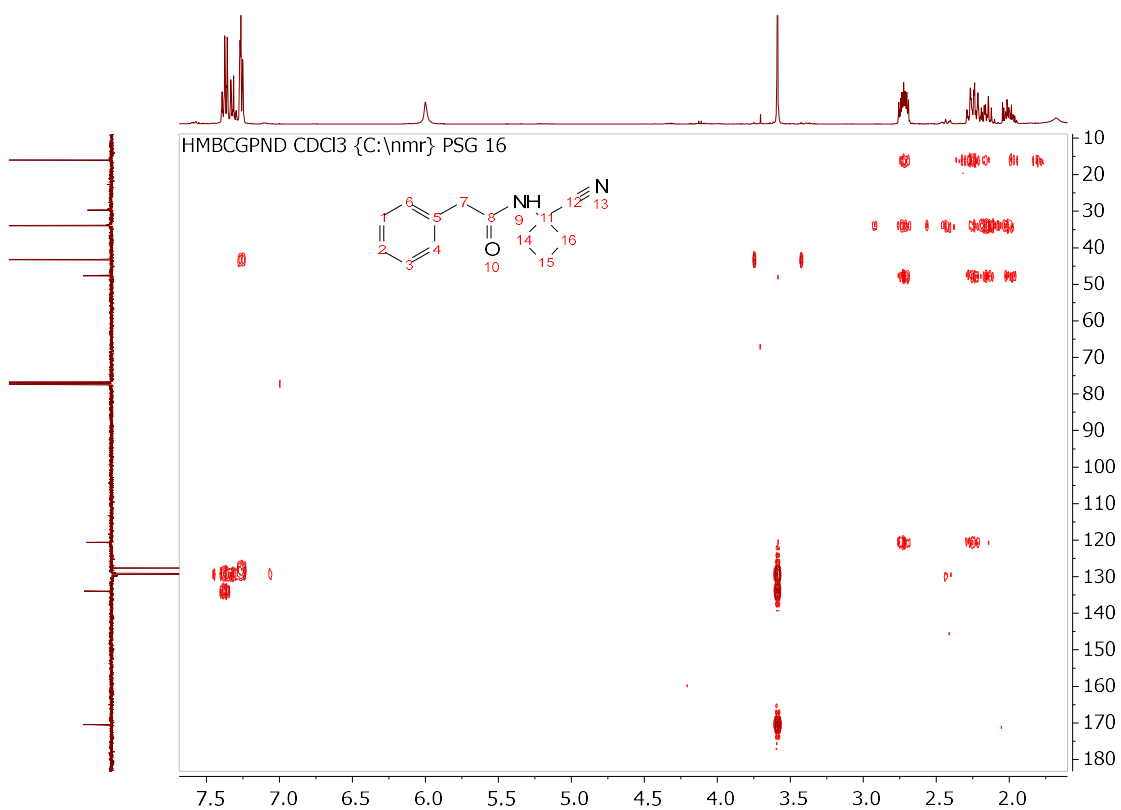

Figure S.59 – HMBC compound (18) in CDCl<sub>3</sub>.

Compound (19)

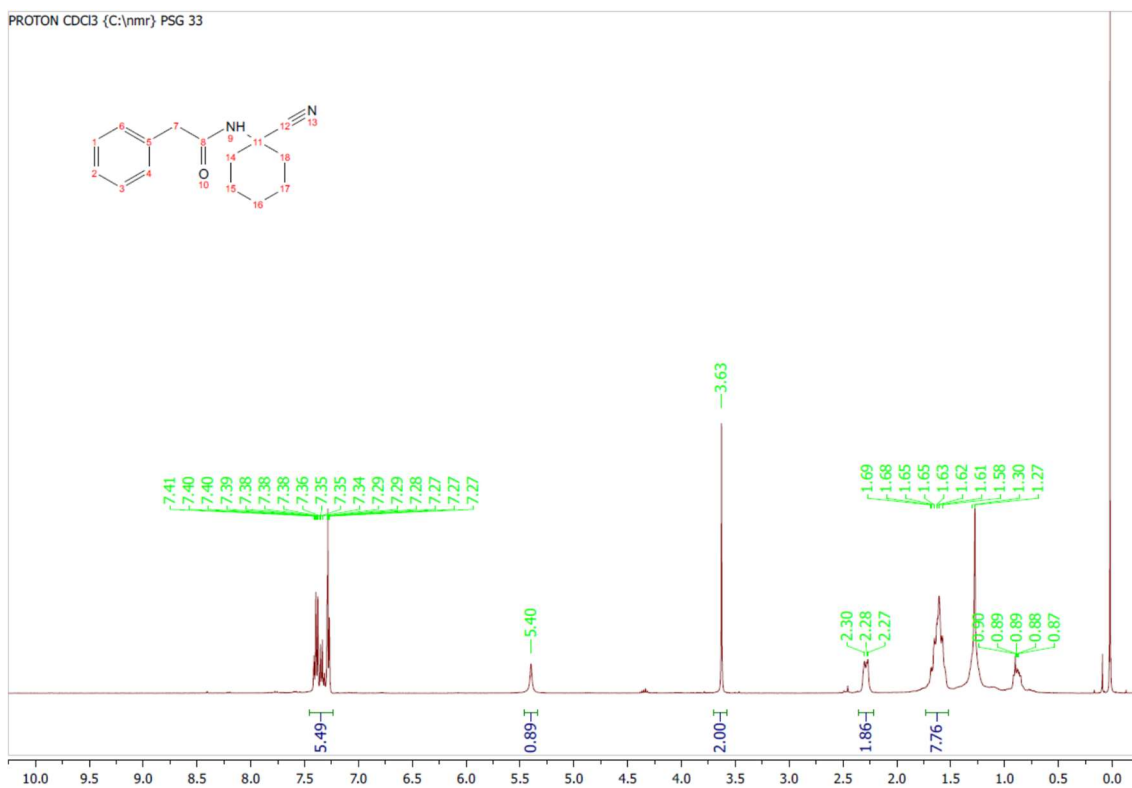

Figure S.60 – <sup>1</sup>H NMR compound (19) in CDCl<sub>3</sub>.

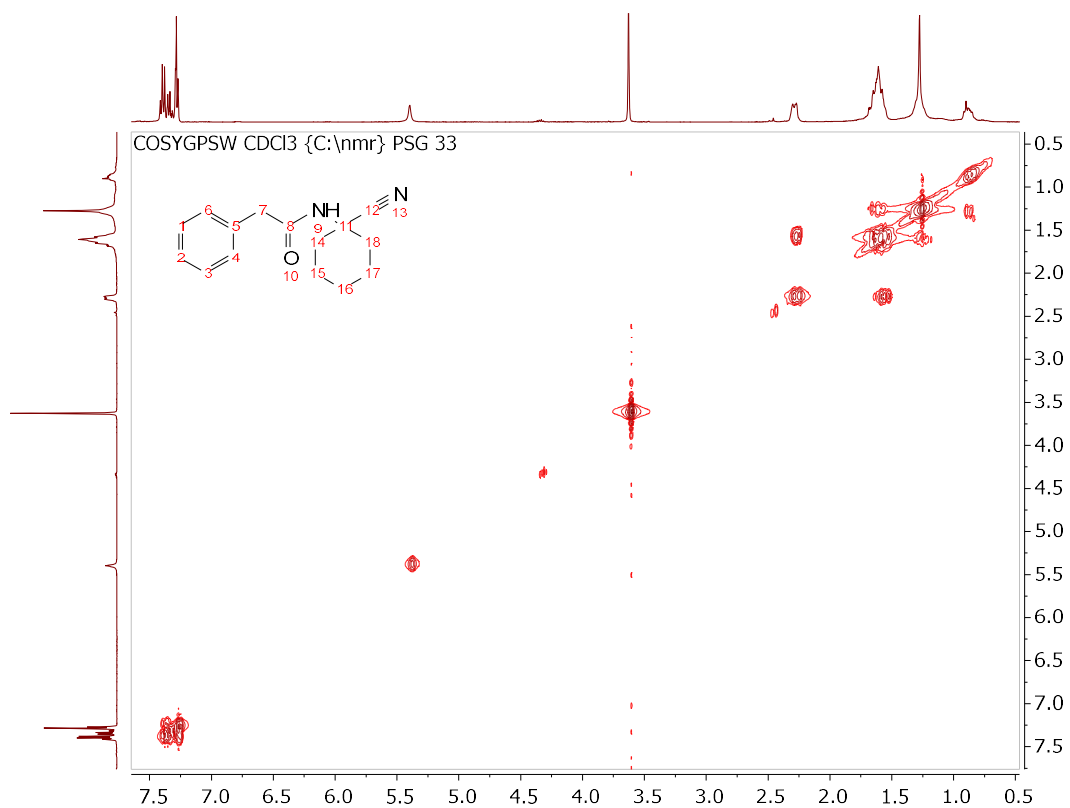

Figure S.61 – COSY compound (19) in CDCl<sub>3</sub>.

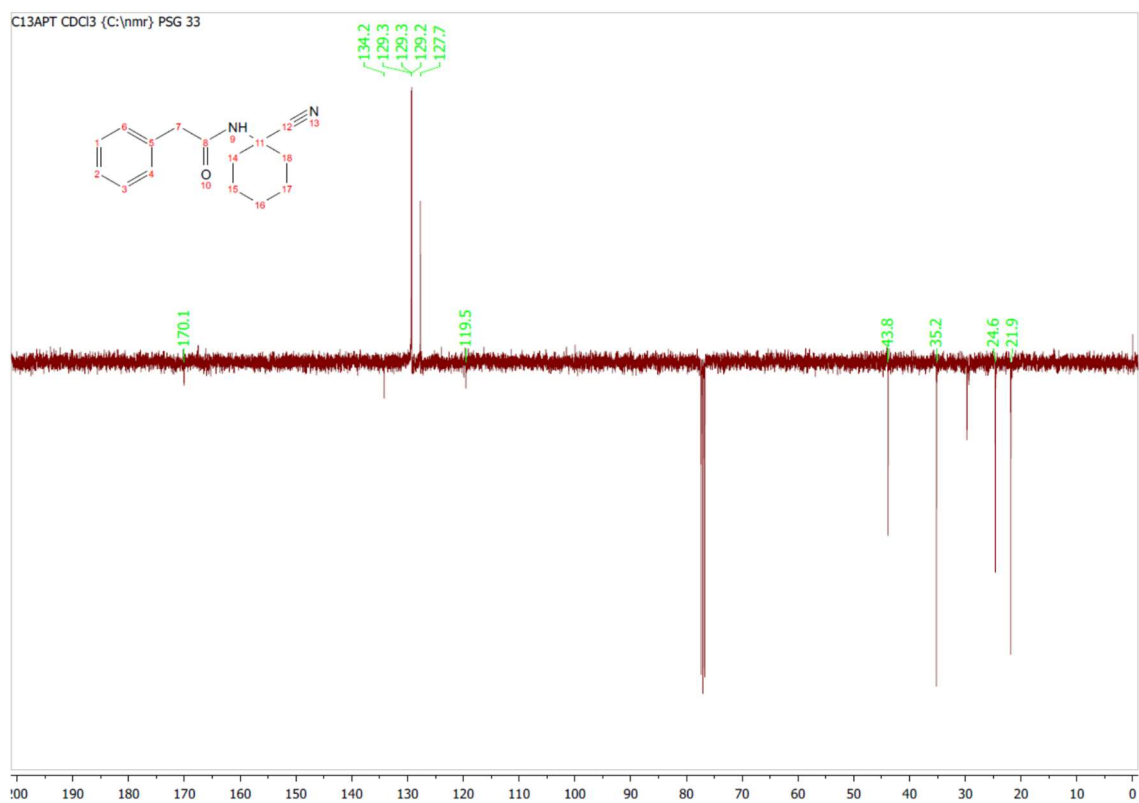

Figure S.62 – APT compound (19) in CDCl<sub>3</sub>.

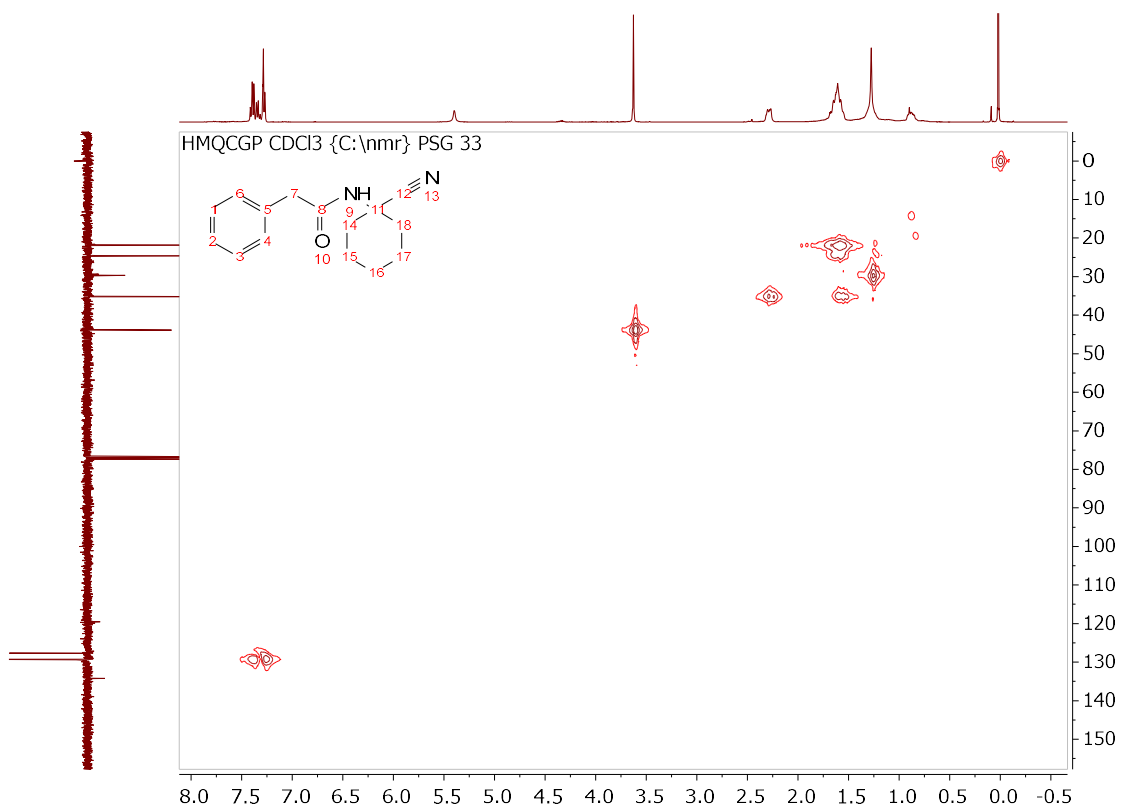

Figure S.63 – HMQC compound (19) in CDCl<sub>3</sub>.

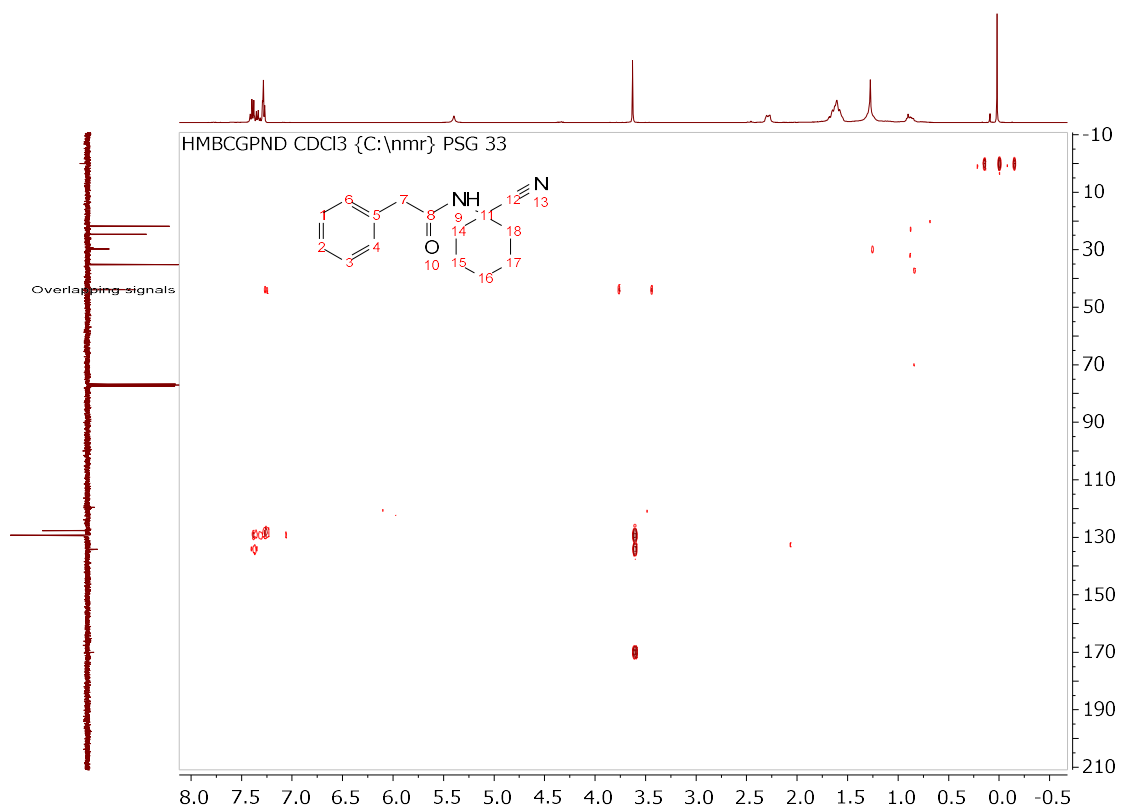

Figure S.64 – HMBC compound (19) in CDCl<sub>3</sub>.

Compound (20)

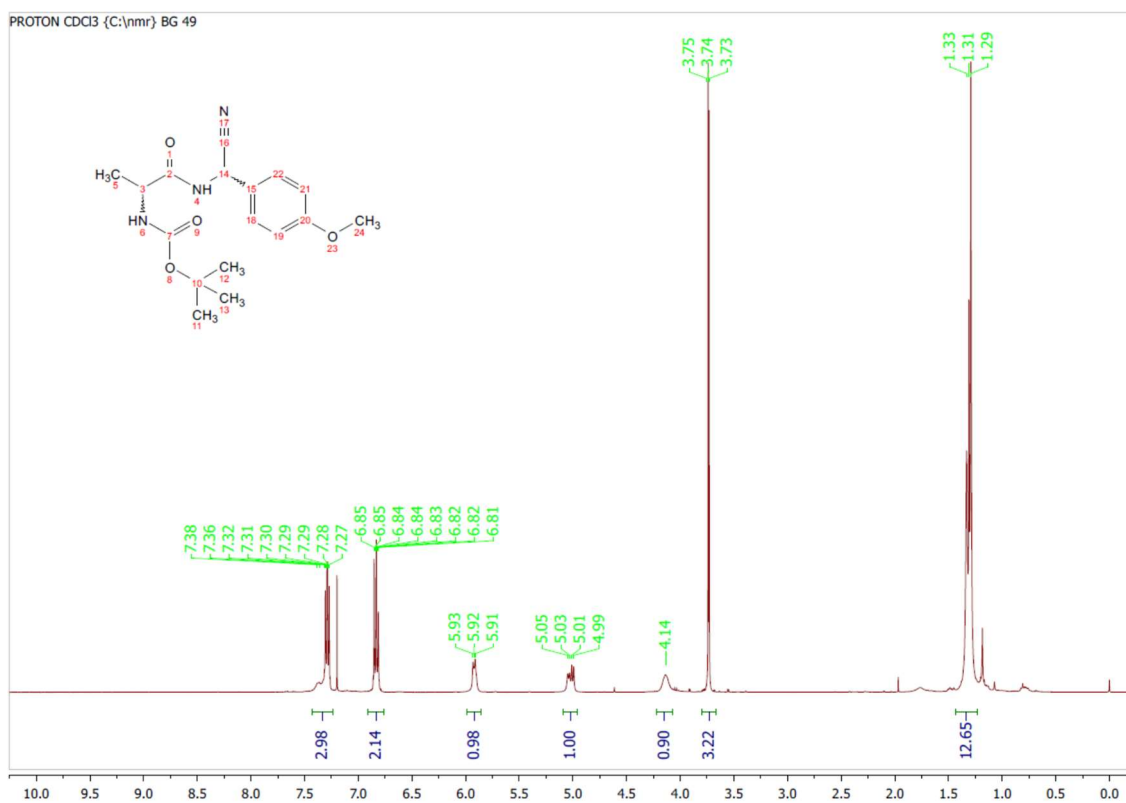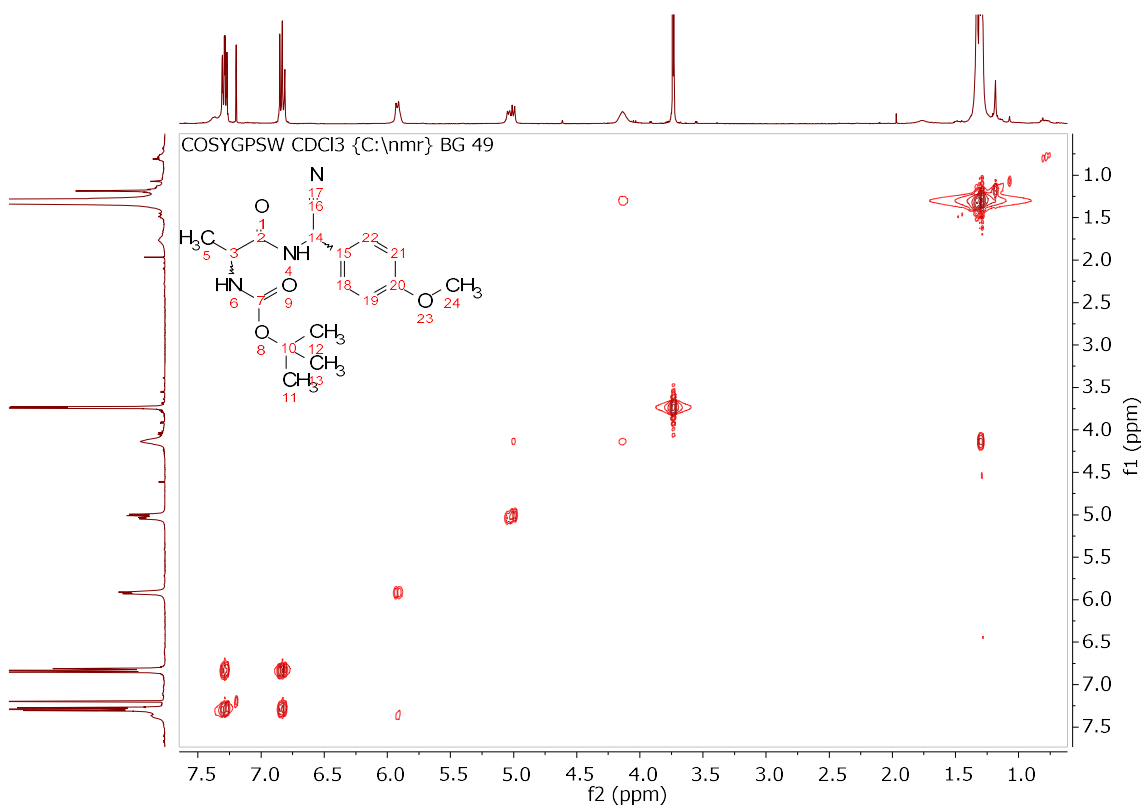

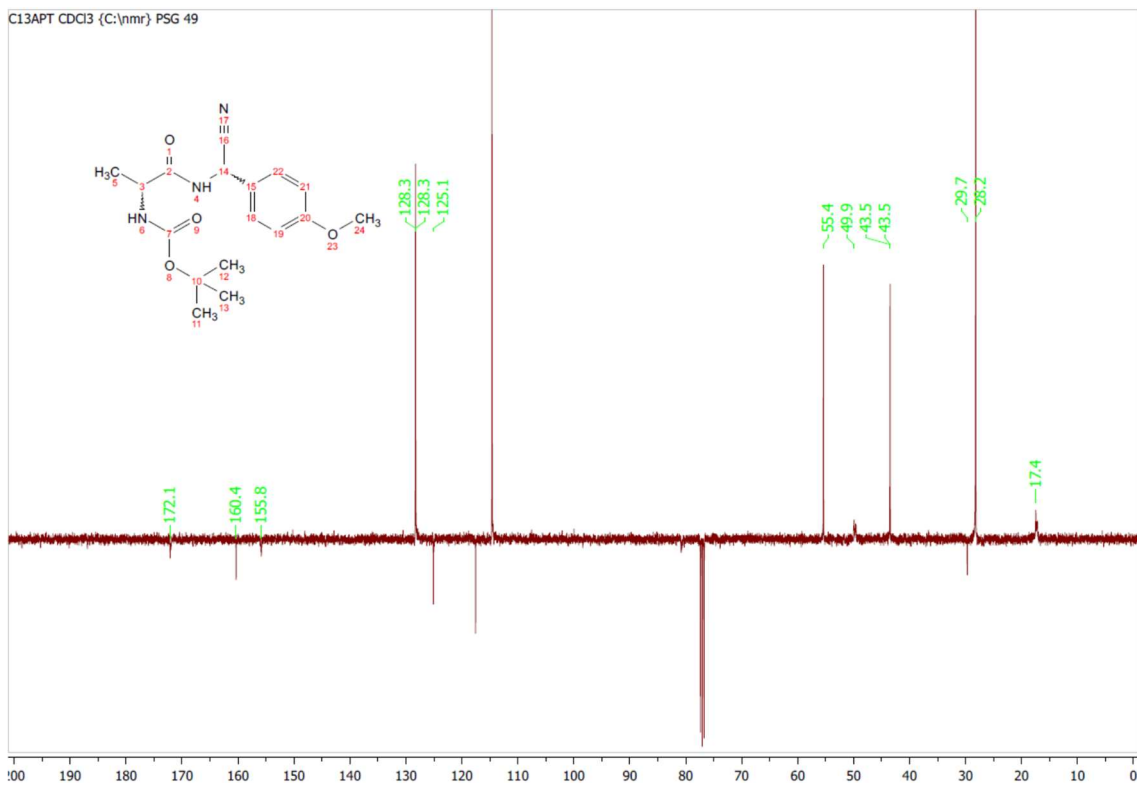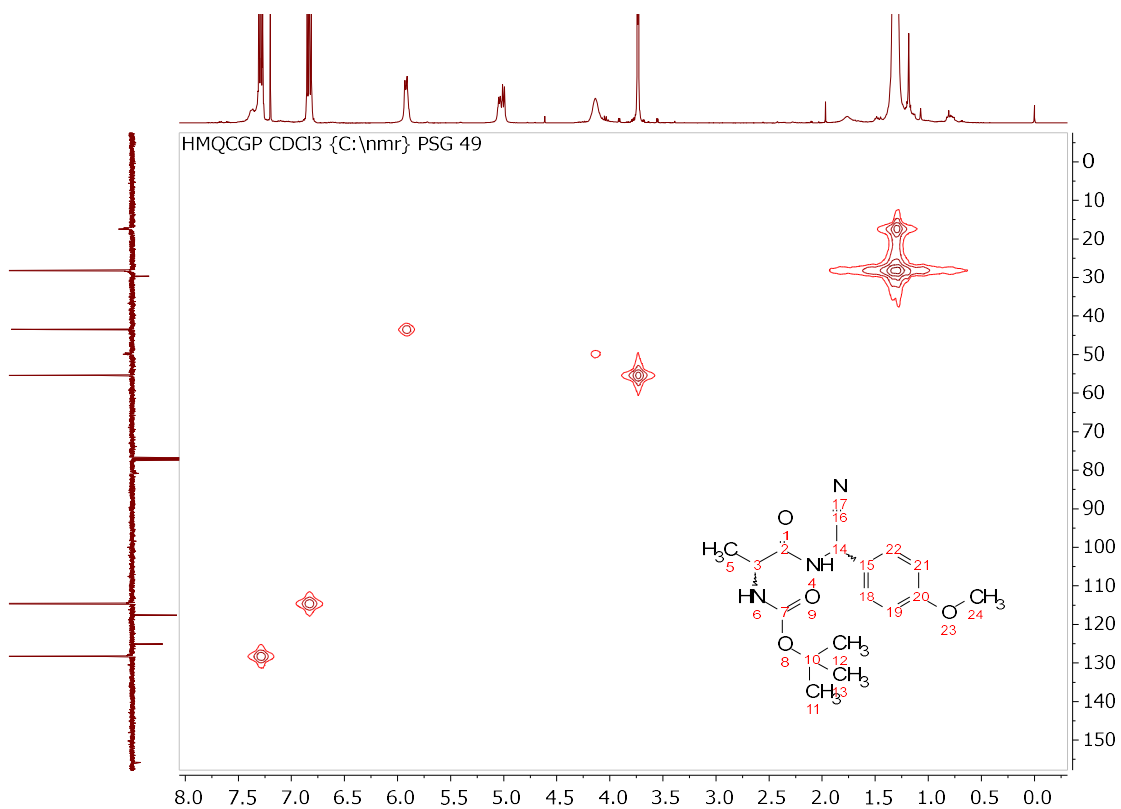

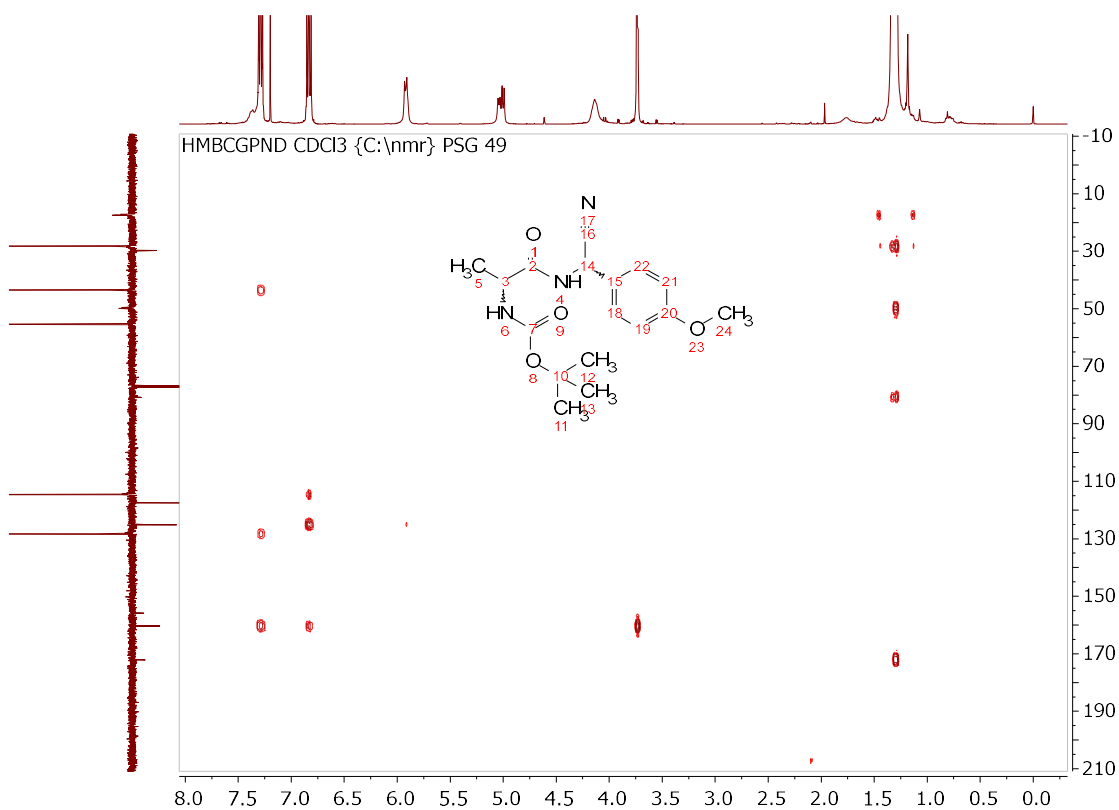

Figure S.69 – HMBC compound (20) in CDCl<sub>3</sub>.

Compound (21)

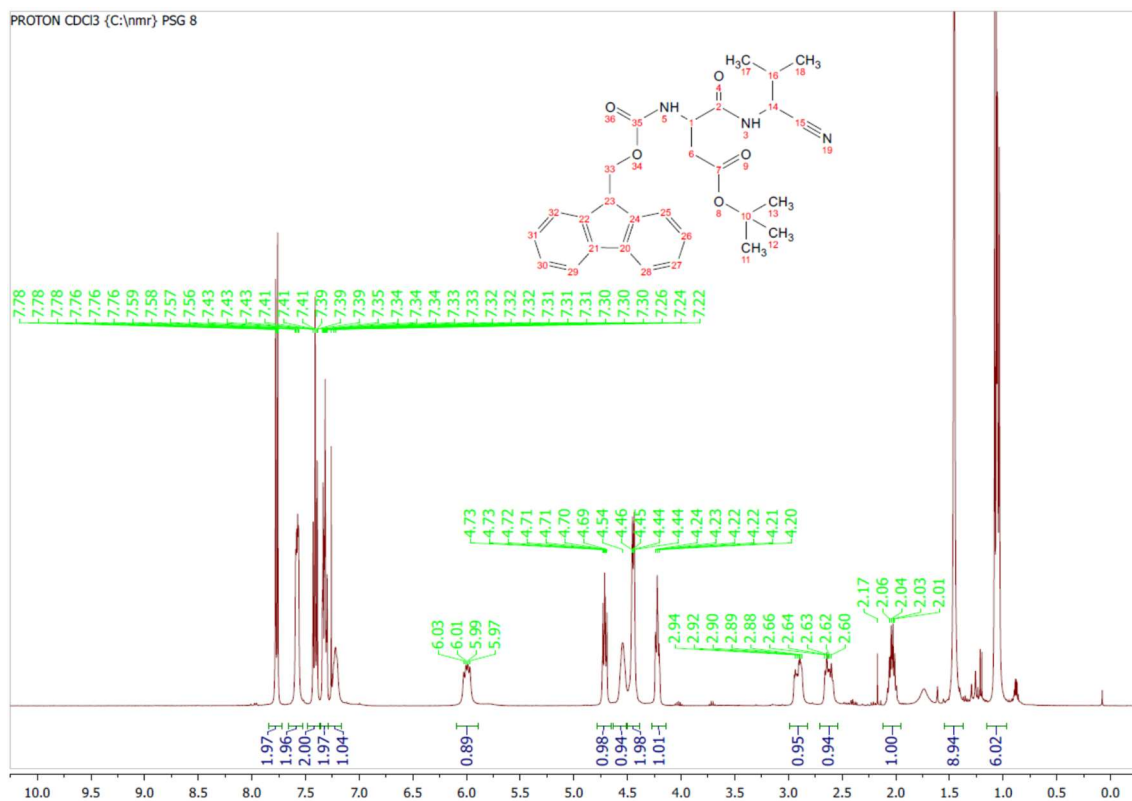

Figure S.70 – <sup>1</sup>H NMR compound (21) in CDCl<sub>3</sub>.

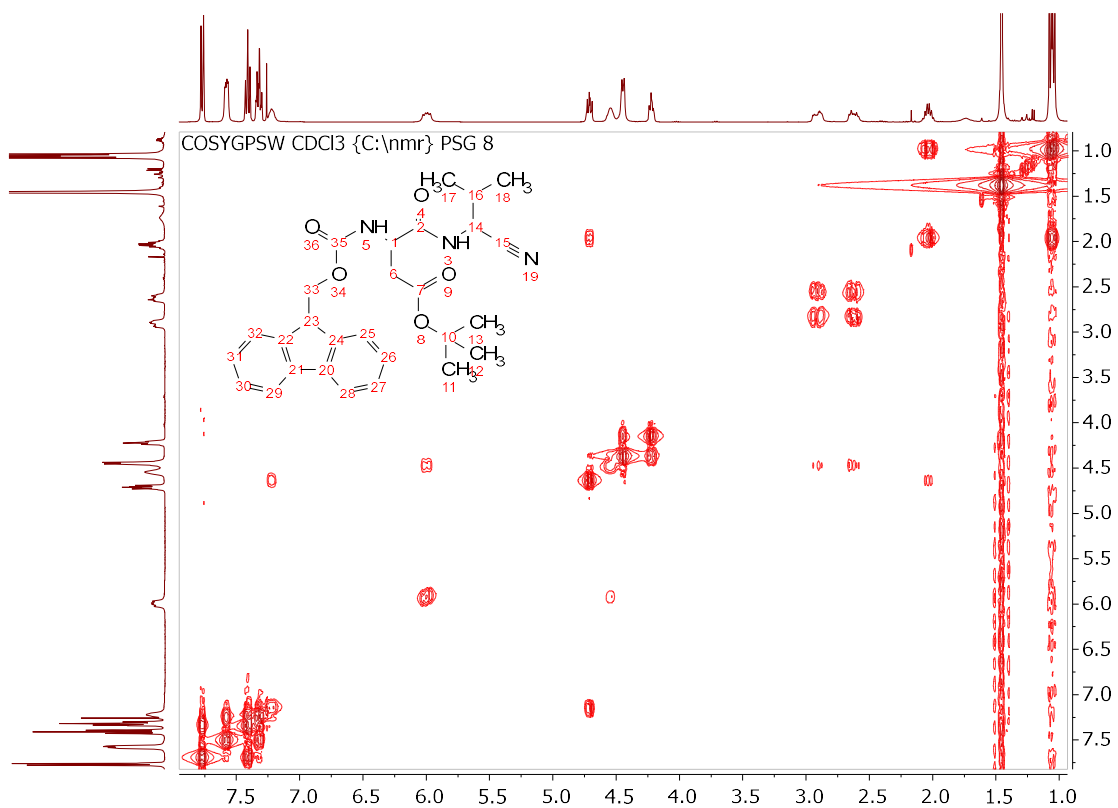

Figure S.71 – COSY compound (21) in CDCl<sub>3</sub>.

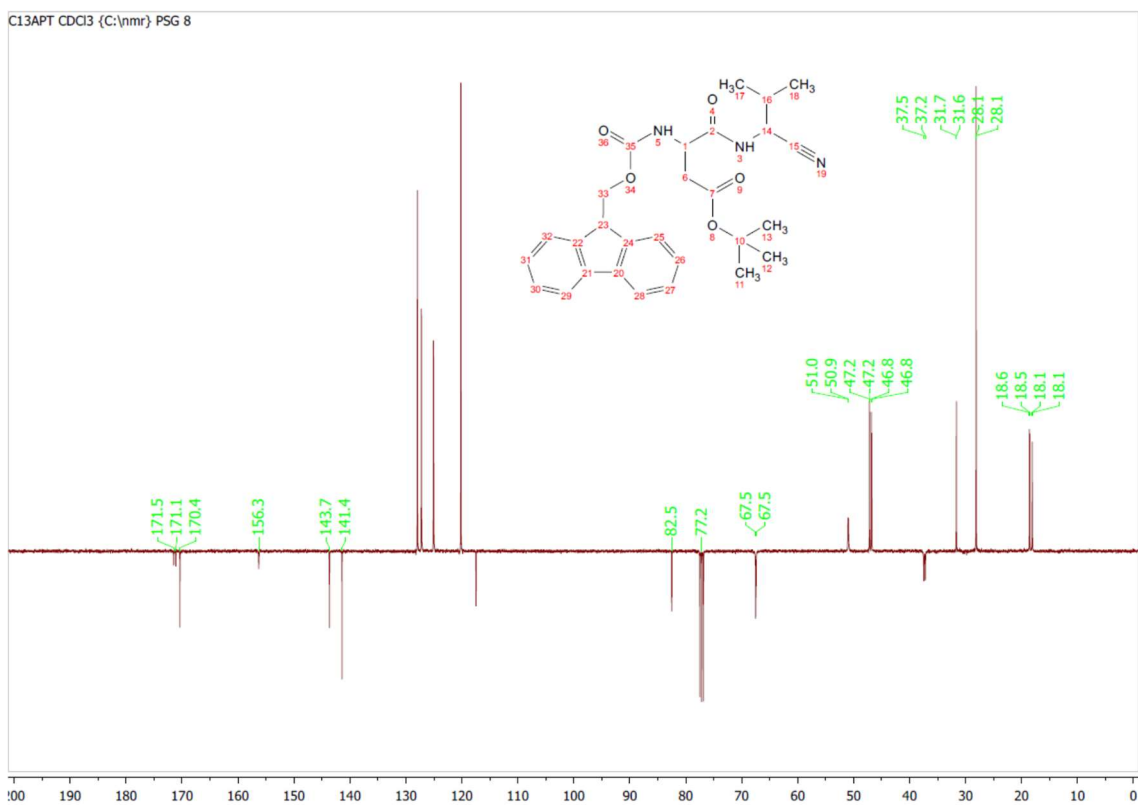

Figure S.72 – APT compound (21) in CDCl<sub>3</sub>.



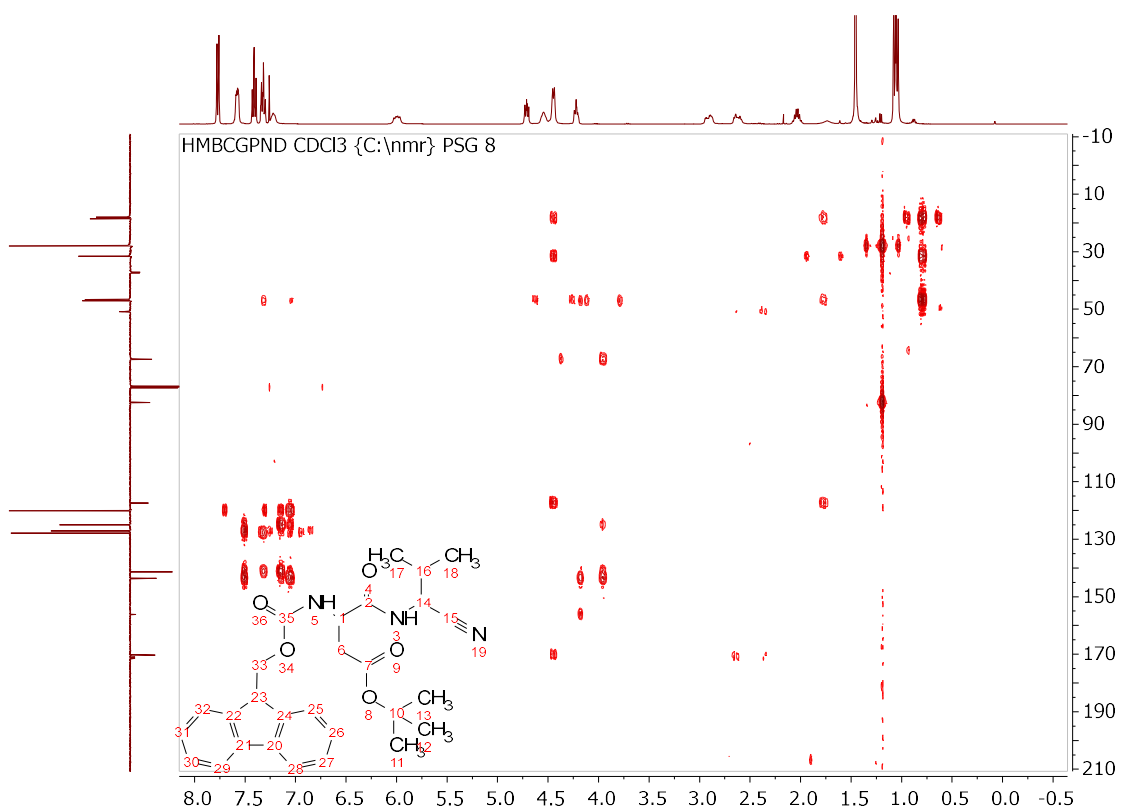

Figure S.73 – HMQC compound (21) in CDCl<sub>3</sub>.

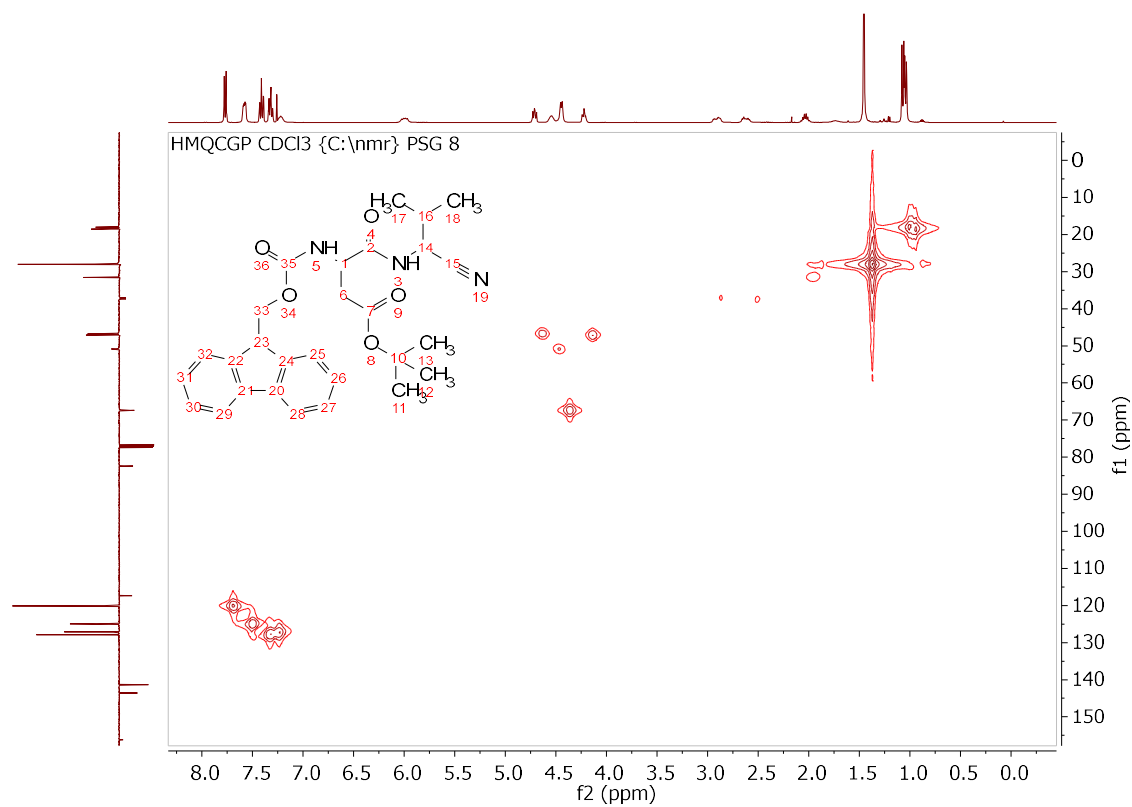

Figure S.74 – HMBC compound (21) in CDCl<sub>3</sub>.

# Compound (22)

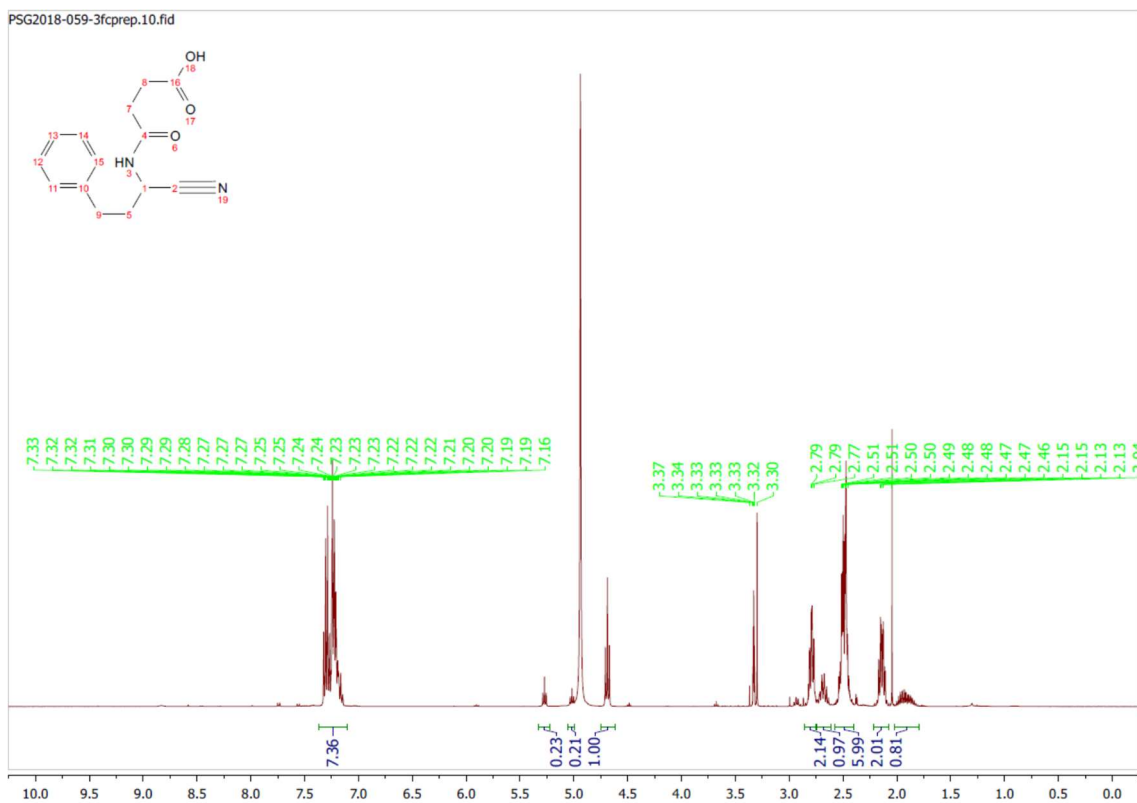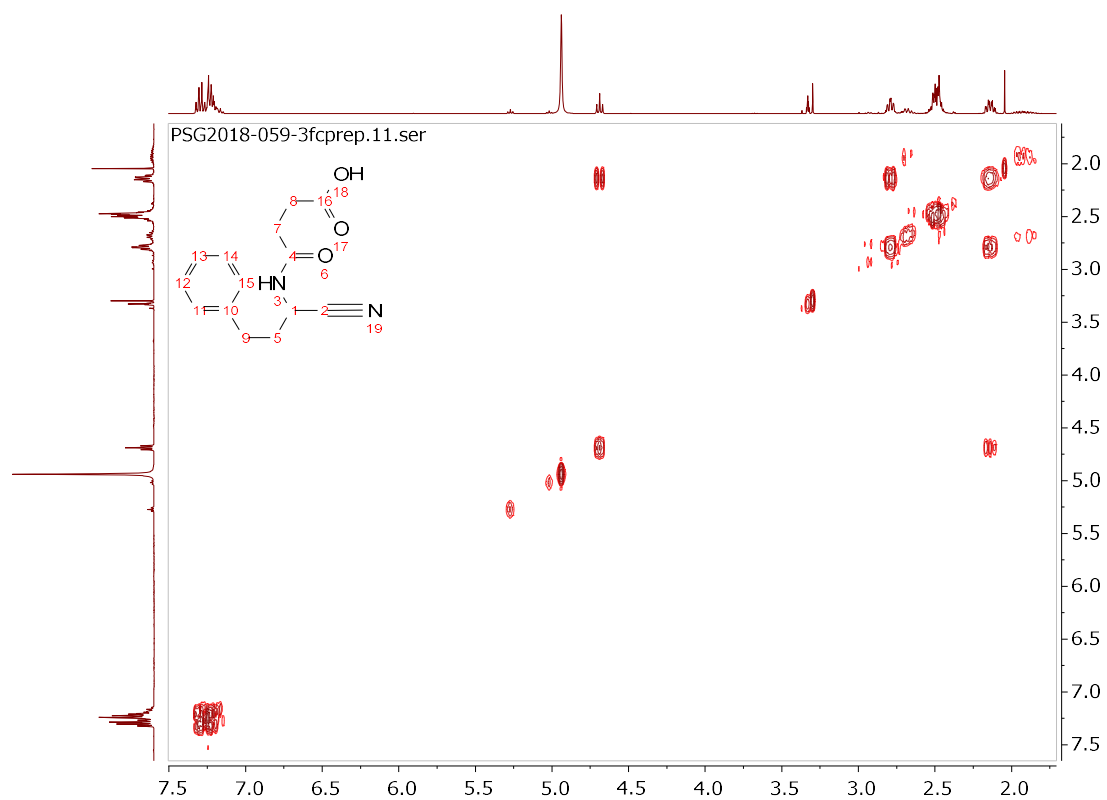

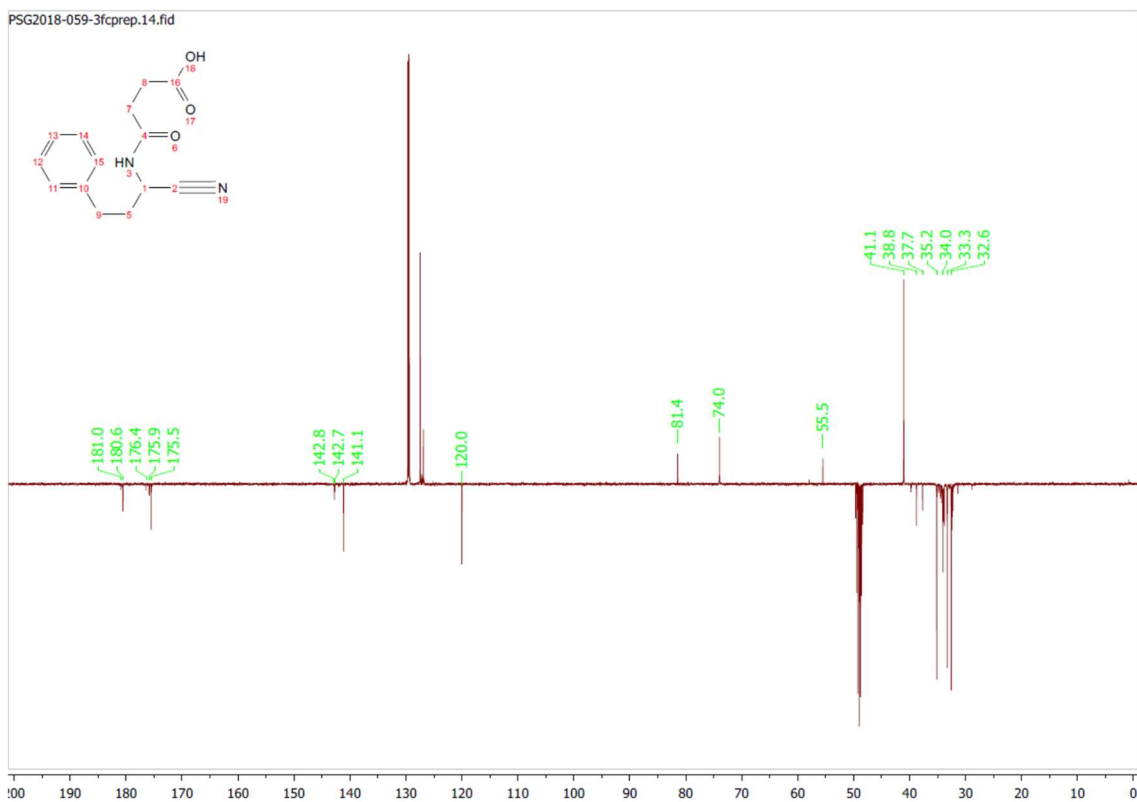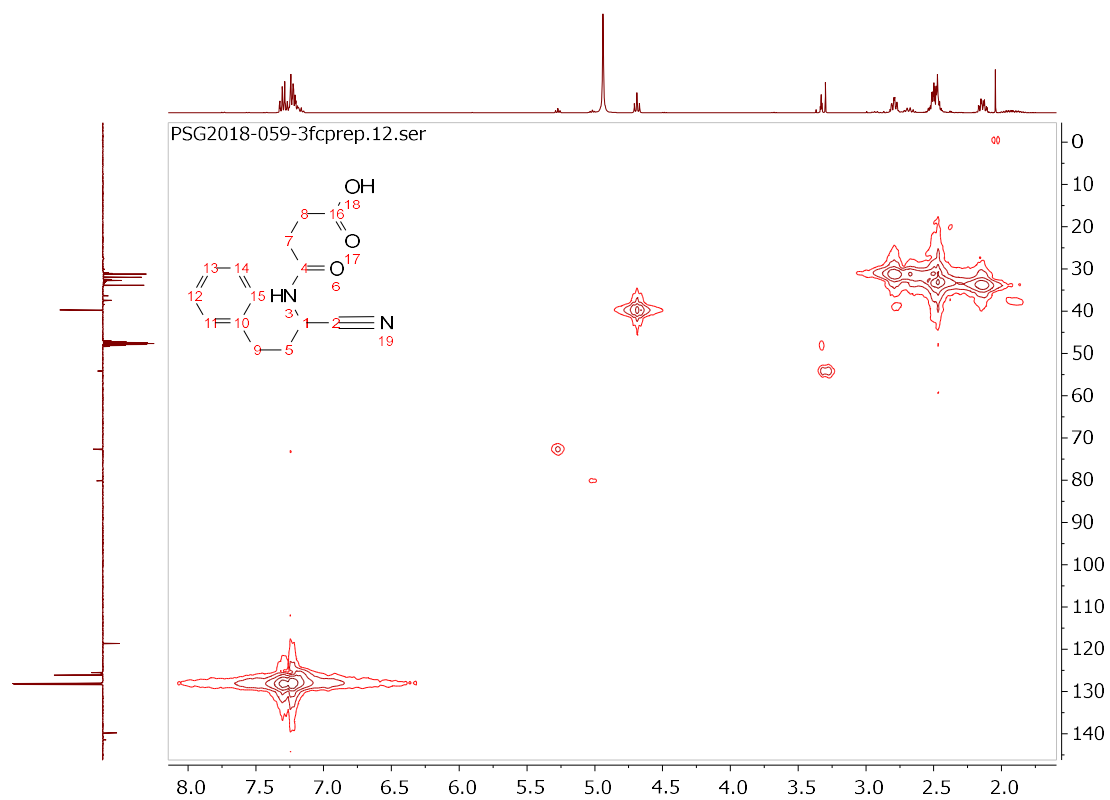

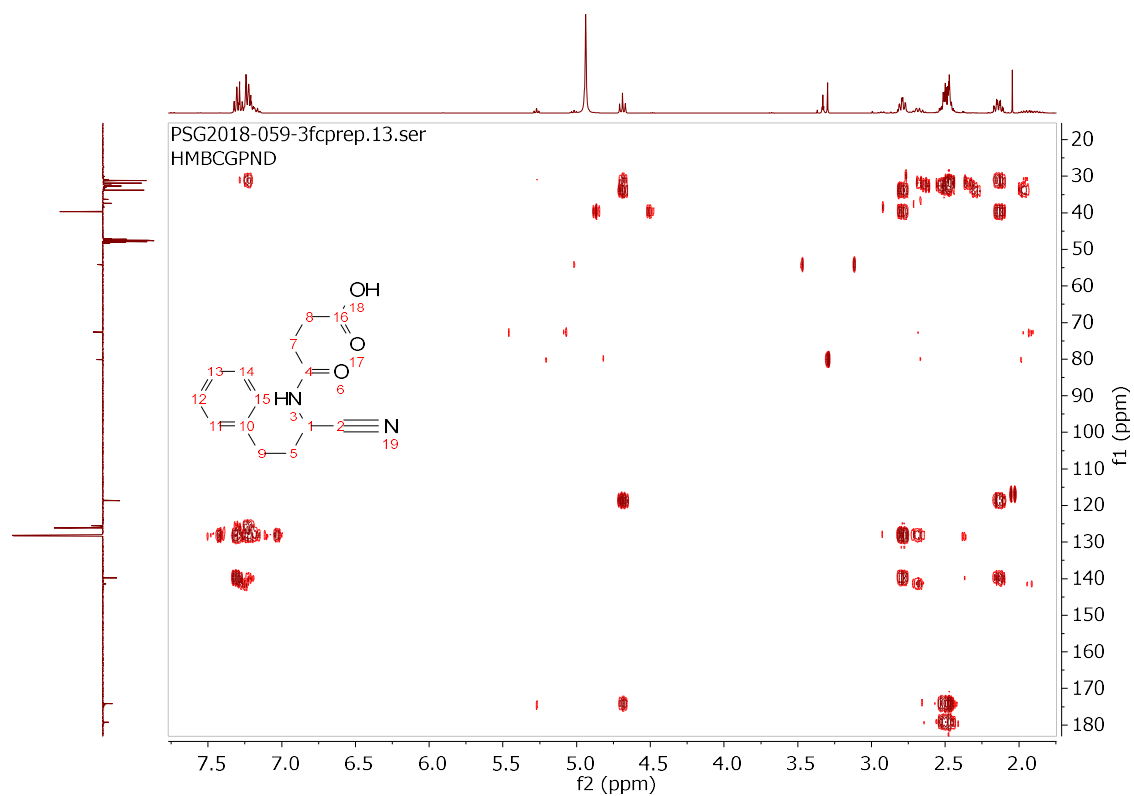

Figure S.79 – HMBC compound **(22)** in MeOD-d4.

Compound **(23)**

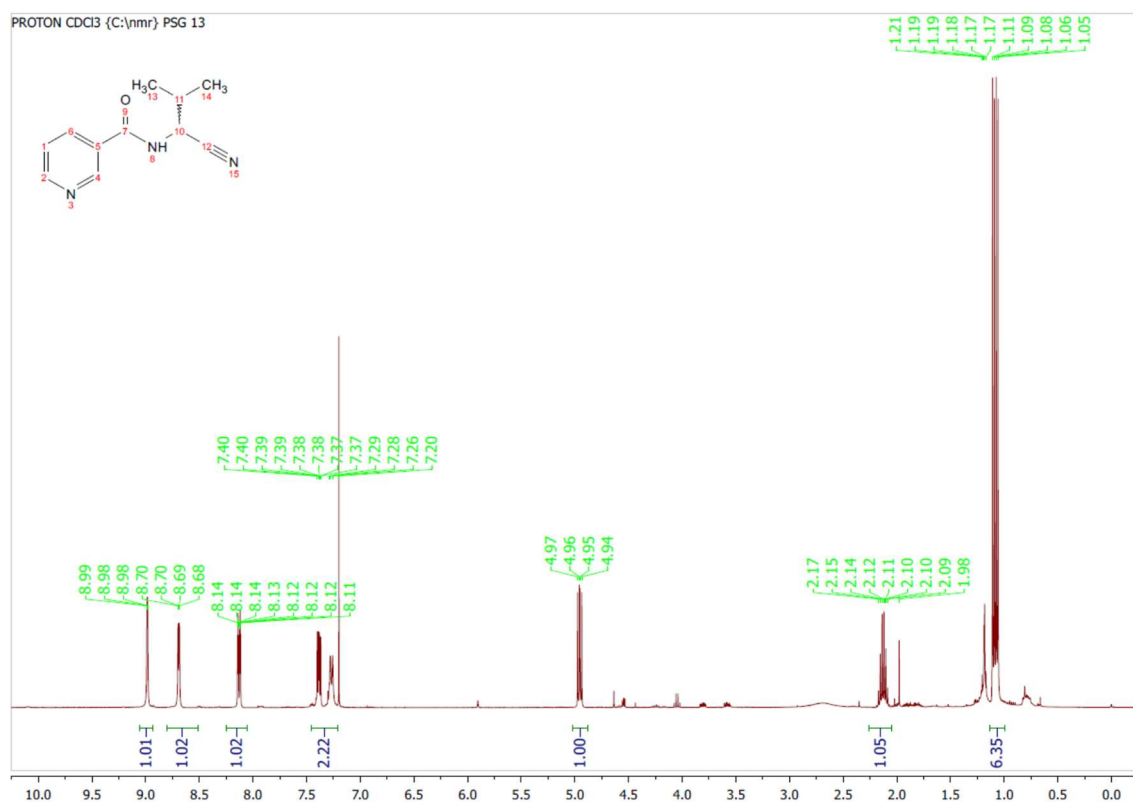

Figure S.80 – <sup>1</sup>H NMR compound **(23)** in CDCl<sub>3</sub>.

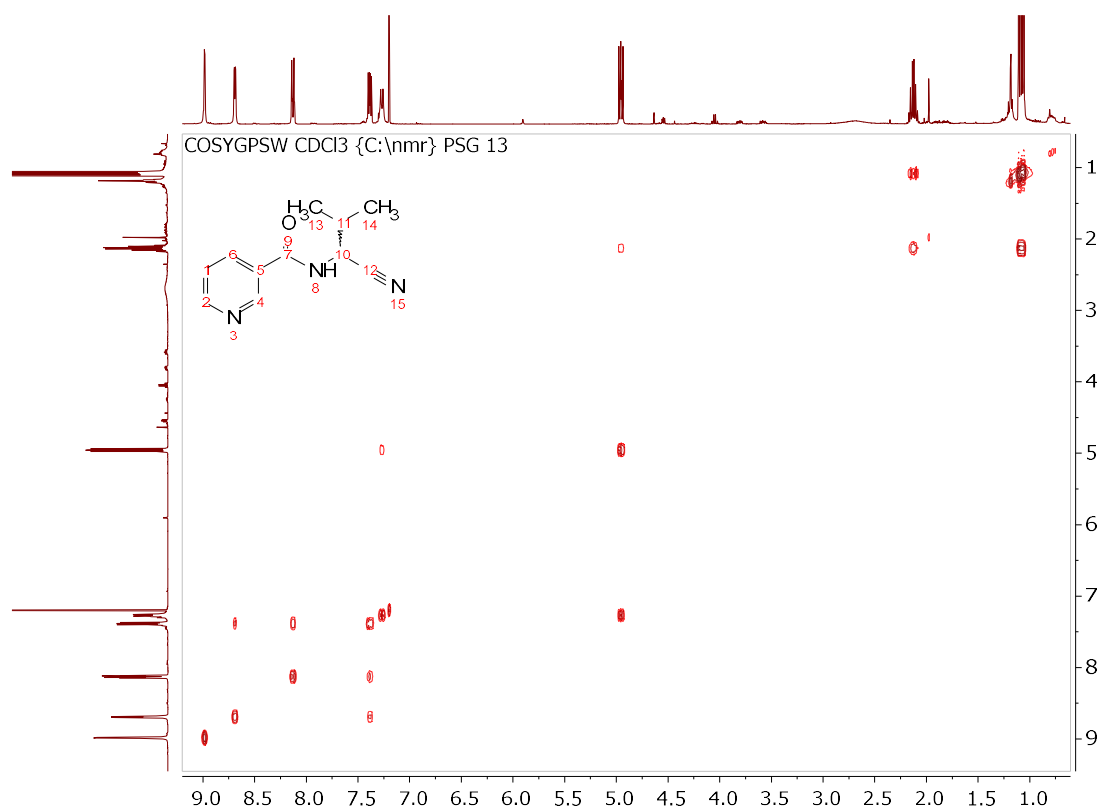

Figure S.81 – COSY compound **(23)** in CDCl<sub>3</sub>.

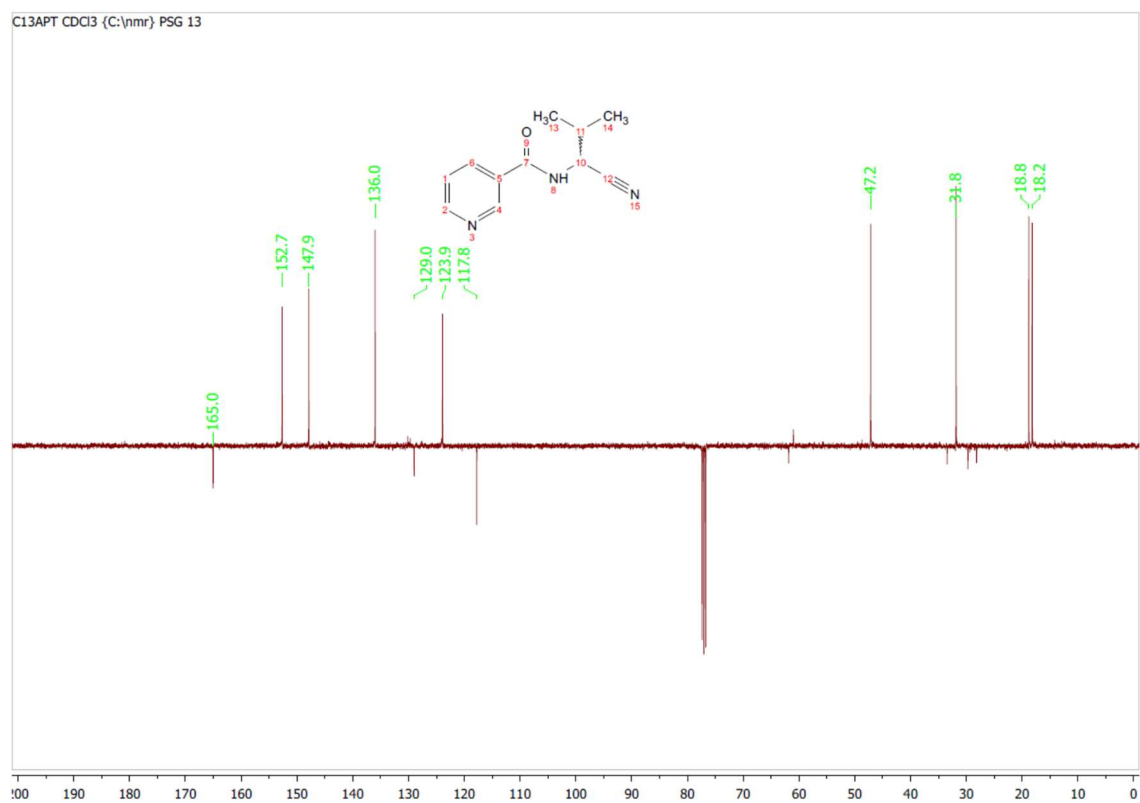

Figure S.82 – APT compound **(23)** in CDCl<sub>3</sub>.

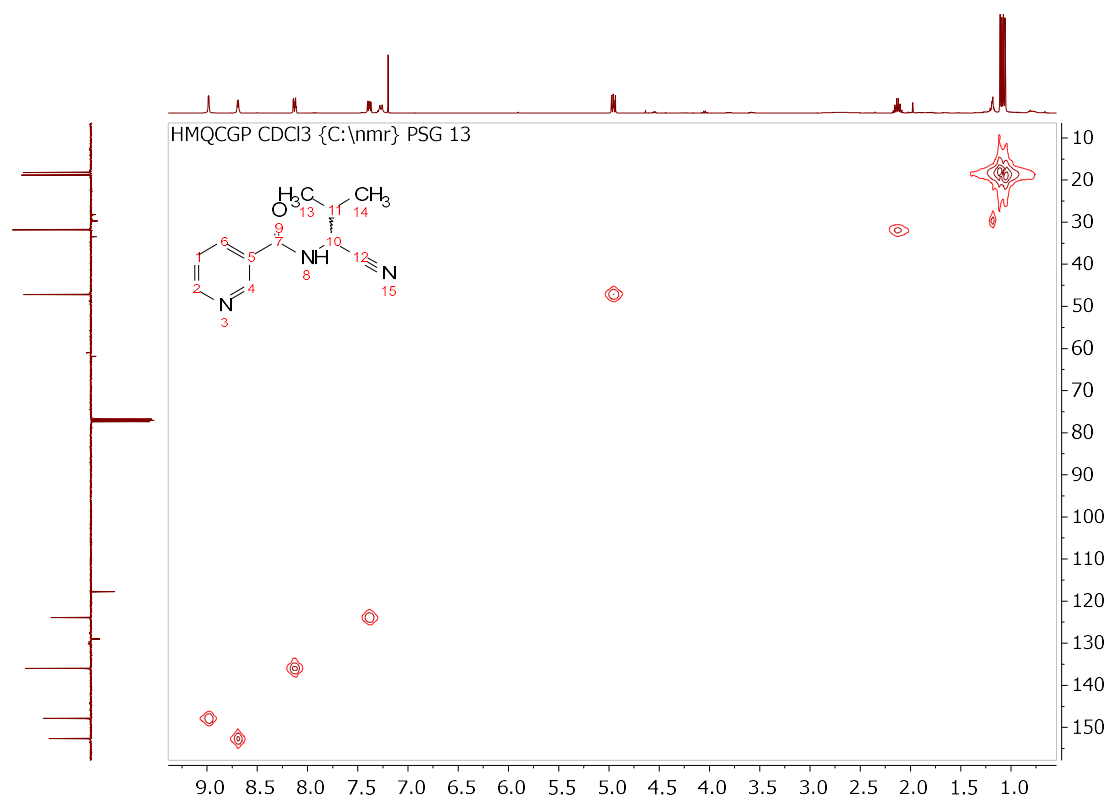

Figure S.83 – HMBC compound **(23)** in CDCl<sub>3</sub>.

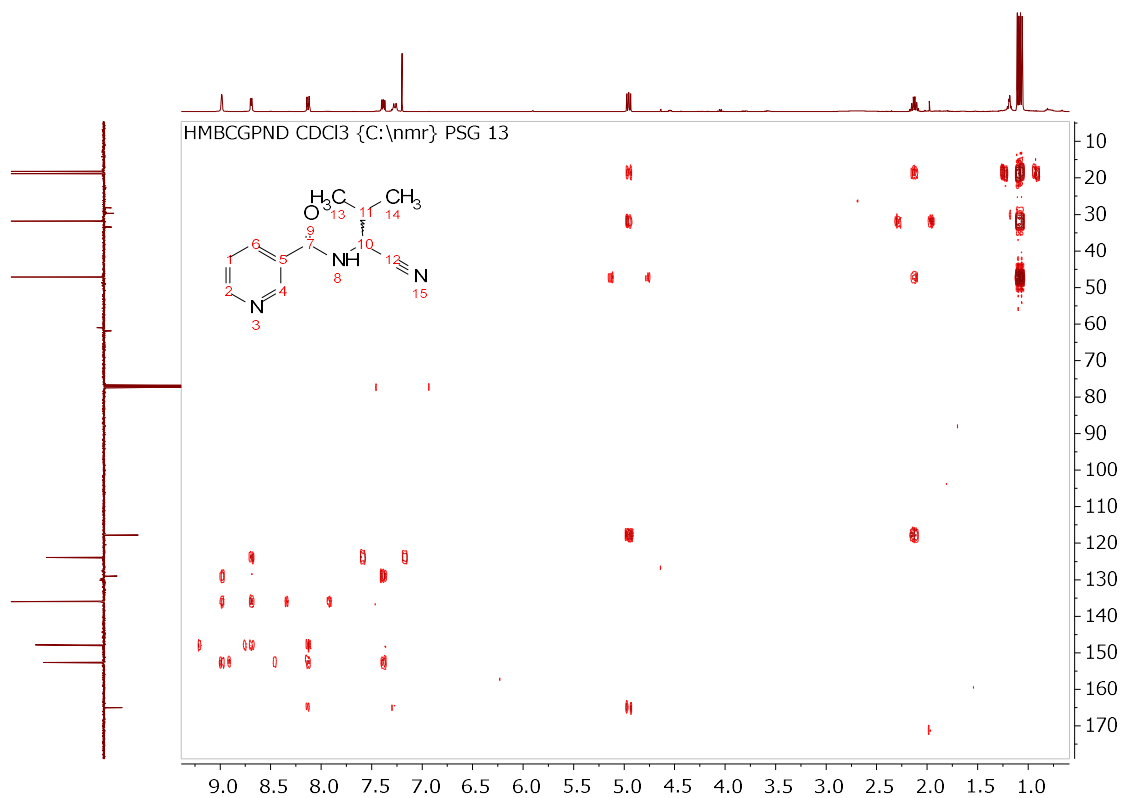

Figure S.84 – HMBC compound **(23)** in CDCl<sub>3</sub>.

Compound **(24)**

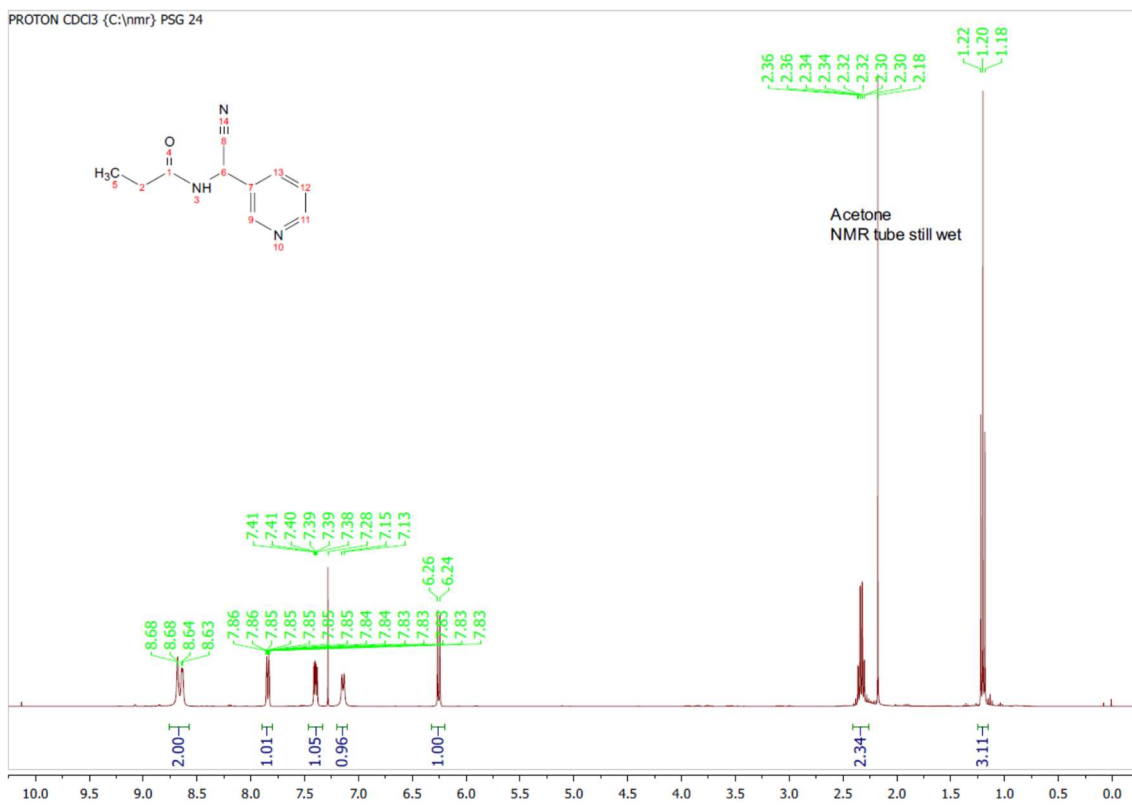

Figure S.85 – <sup>1</sup>H NMR compound **(24)** in CDCl<sub>3</sub>.

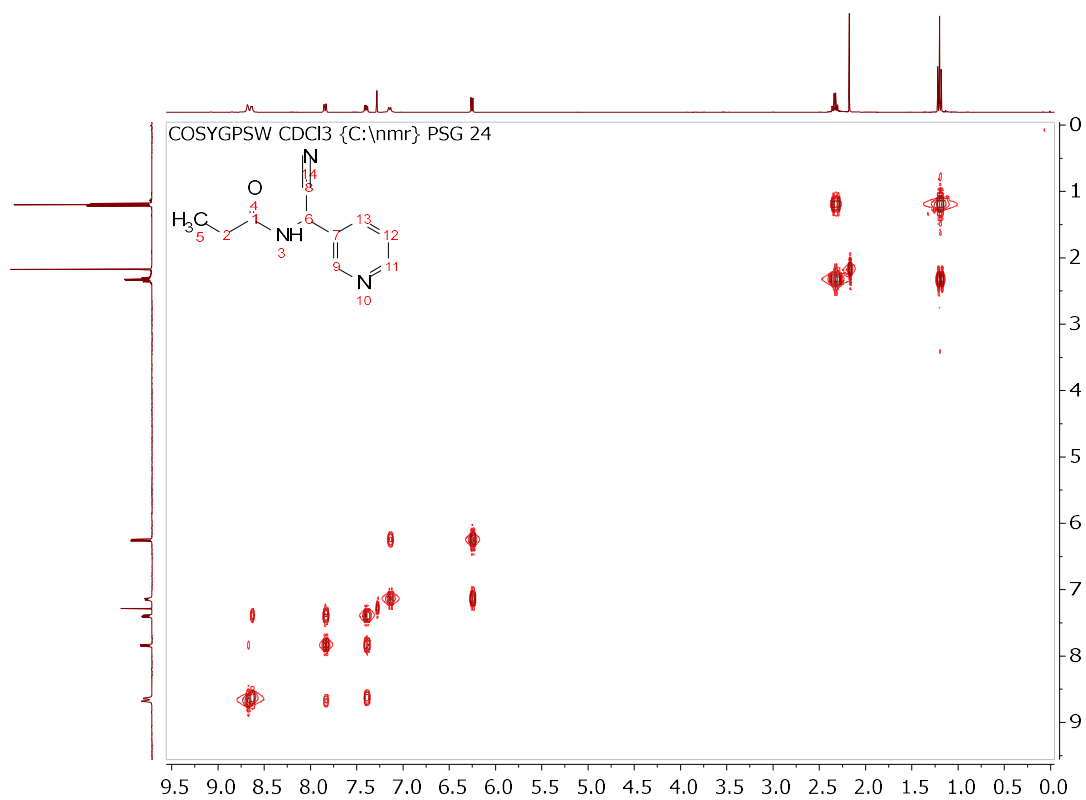

Figure S.86 – COSY compound **(24)** in CDCl<sub>3</sub>.

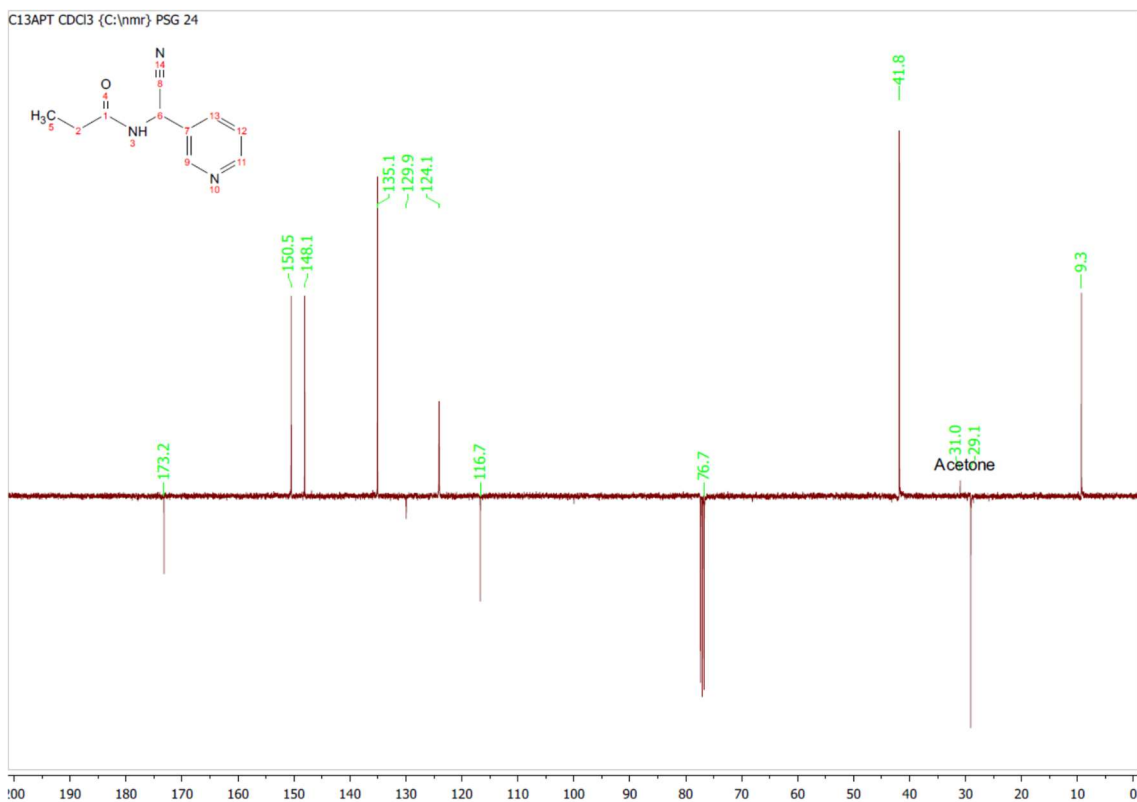

Figure S.87 – APT compound **(24)** in CDCl<sub>3</sub>.

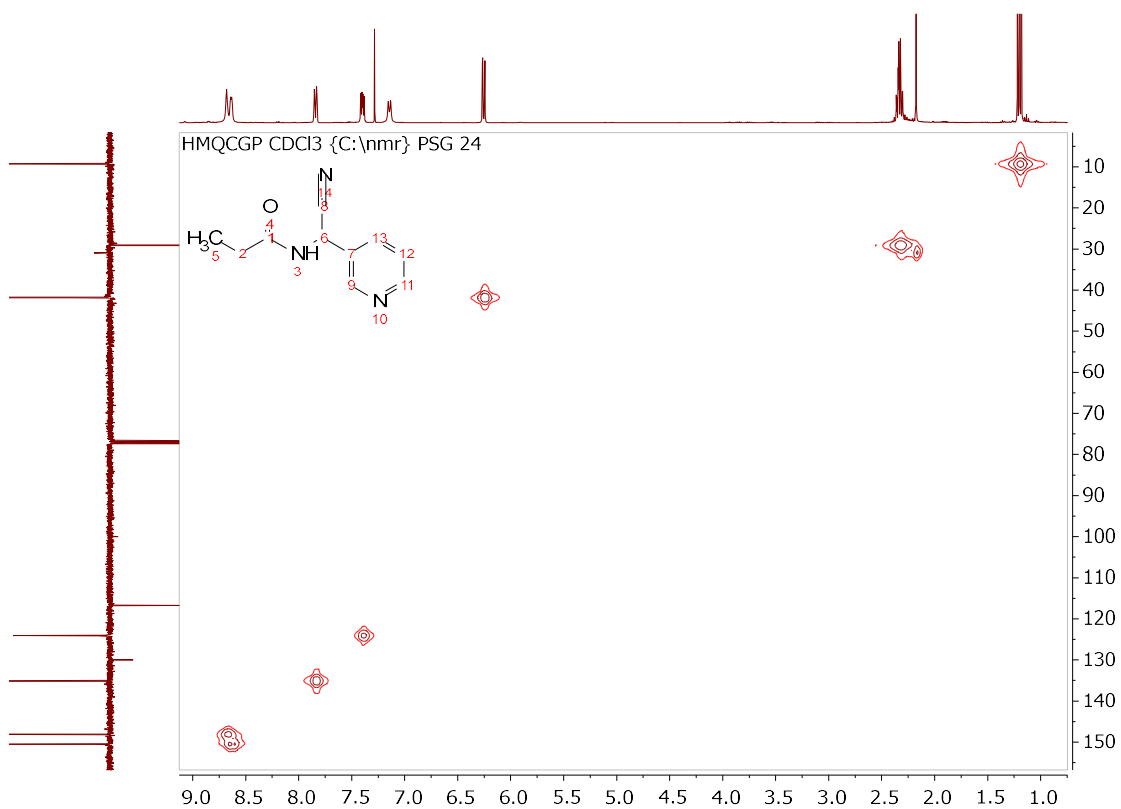

Figure S.88 – HMQC compound **(24)** in CDCl<sub>3</sub>.



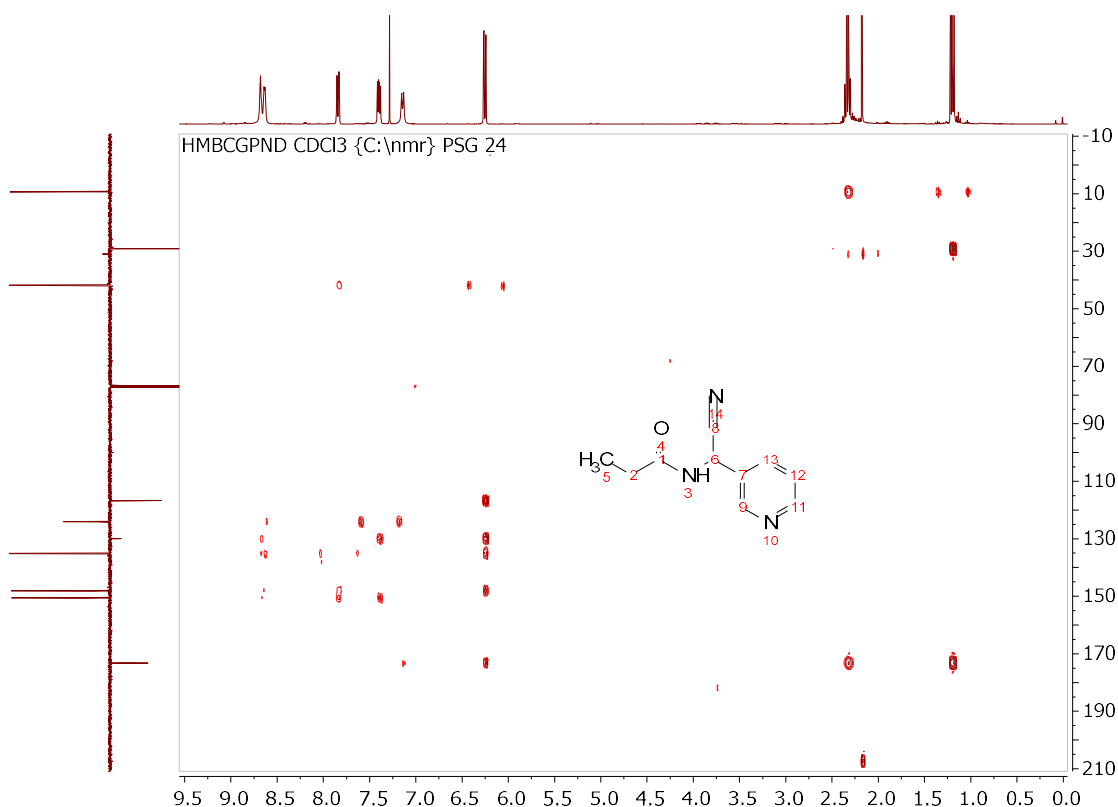

Figure S.89 – HMBC compound (**24**) in CDCl<sub>3</sub>.

## HRMS

The samples were used as delivered. 10µl of each sample was injected using the CapLC system (Waters, Manchester, UK) and electrosprayed using a standard electrospray source. Samples were injected with an interval of 3 minutes. Positive ion mode accurate mass spectra were acquired using a Q-TOF II instrument (Waters, Manchester, UK). The MS was calibrated prior to use with a 0.1% H<sub>3</sub>PO<sub>4</sub> solution.

The spectra were lock mass corrected using the know mass of the nearest H<sub>3</sub>PO<sub>4</sub> cluster or a known background ion.

Analytes were detected as protonated molecule unless stated otherwise. The measured masses, best fitting elemental composition and corresponding calculated monoisotopic masses are given in the attached spectra. All measured masses are within a difference of 5ppm compared to the calculated mass unless specified otherwise. The presented MS data does allow to calculate the elemental composition of the analytes, but does not decide on structure or purity of the samples.



| Accurate mass sample submission list |    |    |   |   |            |          |            |                                                                                     |          |             |             |             |  |  |  |  |  |  |  |  |  |
|--------------------------------------|----|----|---|---|------------|----------|------------|-------------------------------------------------------------------------------------|----------|-------------|-------------|-------------|--|--|--|--|--|--|--|--|--|
| Name: Pedro Santos Gonçalves         |    |    |   |   |            |          |            |                                                                                     |          |             |             |             |  |  |  |  |  |  |  |  |  |
| Data file(s): GVH_20190603_15.raw    |    |    |   |   |            |          |            |                                                                                     |          |             |             |             |  |  |  |  |  |  |  |  |  |
| sample Cod                           | C  | H  | N | O | Mol weight | (M+H)+   | (M+Na)+    | Structure                                                                           | (M+H)+   |             | (M+Na)+     |             |  |  |  |  |  |  |  |  |  |
|                                      |    |    |   |   |            |          |            |                                                                                     | measured | error (ppm) | measured    | error (ppm) |  |  |  |  |  |  |  |  |  |
| PSG2018-059                          | 14 | 16 | 2 | 3 | 260,116092 | 261,1234 | 283,105312 | 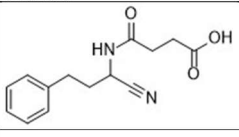   |          |             | -1000000,00 | -1000000,00 |  |  |  |  |  |  |  |  |  |
|                                      | 15 | 20 | 2 | 4 | 292,142307 | 293,1496 | 315,131527 | + Methanol                                                                          | 293,1502 | 2,11        | 315,1330    | 4,67        |  |  |  |  |  |  |  |  |  |
| PSG2018-058-1                        | 11 | 19 | 3 | 3 | 241,142641 | 242,1499 | 264,131861 |    | 242,1505 | 2,41        | 264,1328    | 3,55        |  |  |  |  |  |  |  |  |  |
| PSG2018-061                          | 15 | 18 | 2 | 1 | 242,141913 | 243,1492 | 265,131133 |    | 243,1502 | 4,16        | 265,1335    | 8,93        |  |  |  |  |  |  |  |  |  |
| PSG2018-050-1                        | 17 | 23 | 3 | 4 | 333,168856 | 334,1761 | 356,158076 |   | 334,1774 | 3,80        | 356,1597    | 4,56        |  |  |  |  |  |  |  |  |  |
| PSG2018-055-1iso                     | 14 | 16 | 2 | 3 | 260,116092 | 261,1234 | 283,105312 |  | 261,1236 | 0,89        | 283,1066    | 4,55        |  |  |  |  |  |  |  |  |  |

Table S.2 – Results from HRMS analysis (2 of 3)

| Accurate mass sample submission list |    |    |   |   |   |    |    |   |   |   |            |          |            |                                                                                      |          |             |  |  |  |  |  |
|--------------------------------------|----|----|---|---|---|----|----|---|---|---|------------|----------|------------|--------------------------------------------------------------------------------------|----------|-------------|--|--|--|--|--|
| Name: Pedro Gonçalves                |    |    |   |   |   |    |    |   |   |   |            |          |            |                                                                                      |          |             |  |  |  |  |  |
| Data file(s): GVH_20191115_03.raw    |    |    |   |   |   |    |    |   |   |   |            |          |            |                                                                                      |          |             |  |  |  |  |  |
| GVH_20191129_05.raw                  |    |    |   |   |   |    |    |   |   |   |            |          |            |                                                                                      |          |             |  |  |  |  |  |
| sample Cod                           | C  | H  | N | O | F | Cl | Br | I | S | P | Mol weight | (M+H)+   | (M+Na)+    | Structure                                                                            | (M+H)+   |             |  |  |  |  |  |
|                                      |    |    |   |   |   |    |    |   |   |   |            |          |            |                                                                                      | measured | error (ppm) |  |  |  |  |  |
| PSG2018-058-3fcprep                  | 14 | 16 | 2 | 3 |   |    |    |   |   |   | 260,116092 | 261,1234 | 283,105312 | 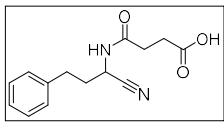 | 261,1241 | 2,81        |  |  |  |  |  |

Table S.3 – Results from HRMS analysis (3 of 3)

# LC-MS Chromatograms

Sample 1 Vial 2:13 ID PSG2016-009-fc-w File PSG2016-009-fc-w Date 06-Jan-2017 Time 16:09:53 Description

1: MS ES+ :BPI Smooth (SG, 2x2)

1.2e+007

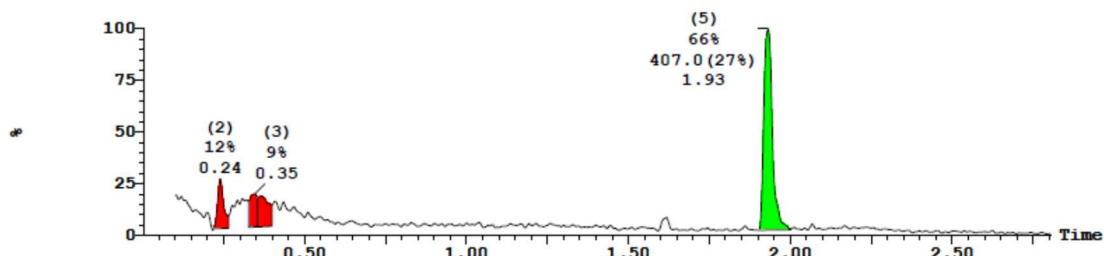

| Peak Number | Compound | Time | AreaAbs | Area %Total | Width | Height | Mass Found |
|-------------|----------|------|---------|-------------|-------|--------|------------|
| 2           |          | 0.24 | 6e+004  | 11.69       | 0     | 3e+006 |            |
| 3           |          | 0.35 | 5e+004  | 8.88        | 0     | 2e+006 |            |
| 4           |          | 0.37 | 7e+004  | 13.06       | 0     | 2e+006 |            |
| 5           | Found    | 1.93 | 3e+005  | 66.37       | 0     | 1e+007 | 407.00     |

2: MS ES- :BPI Smooth (Mn, 2x3)

5.9e+006

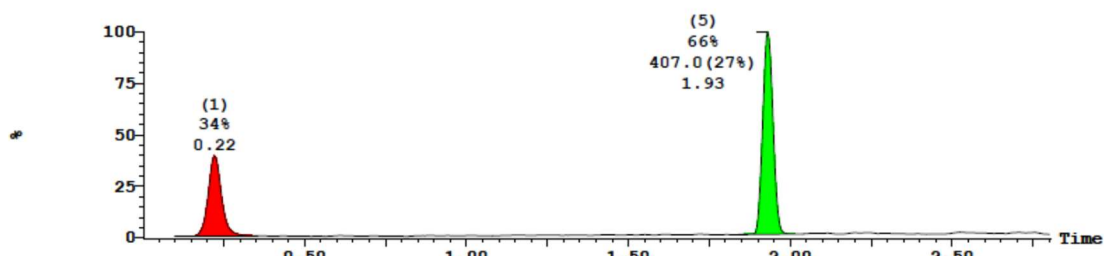

| Peak Number | Compound | Time | AreaAbs | Area %Total | Width | Height | Mass Found |
|-------------|----------|------|---------|-------------|-------|--------|------------|
| 1           |          | 0.22 | 1e+005  | 34.29       | 0     | 2e+006 |            |
| 5           | Found    | 1.93 | 2e+005  | 65.71       | 0     | 6e+006 | 407.00     |

3: UV Detector: TIC

3.216e-1  
Range: 3.216e-1

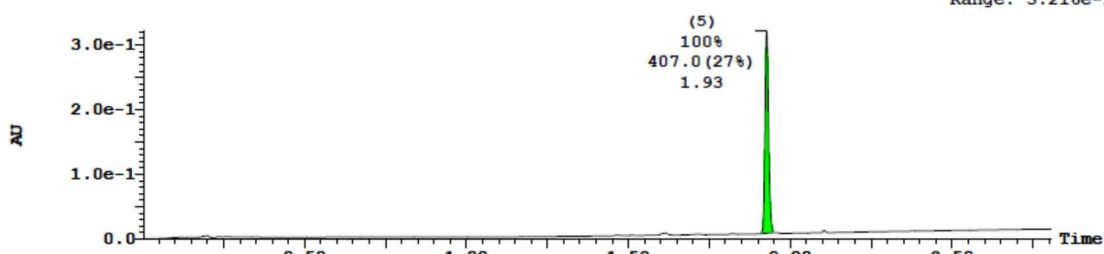

| Peak Number | Compound | Time | AreaAbs | Area %Total | Width | Height | Mass Found |
|-------------|----------|------|---------|-------------|-------|--------|------------|
| 5           | Found    | 1.93 | 4e+003  | 100.00      | 0     | 3e+005 | 407.00     |

Peak ID Compound Time Mass Found

5 Found 1.93 408.00,430.00

1:MS ES+  
9.5e+006

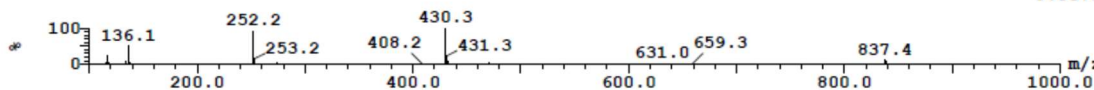

Peak ID Compound Time Mass Found

5 Found 1.93

2:MS ES-  
6.4e+006

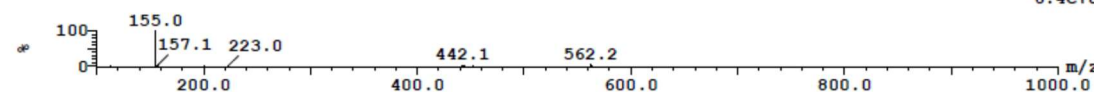

Figure S.90 – Details of UPLC-MS report of compound (9) using generic method.

1: MS ES+ :BPI Smooth (SG, 2x2)

3.4e+007

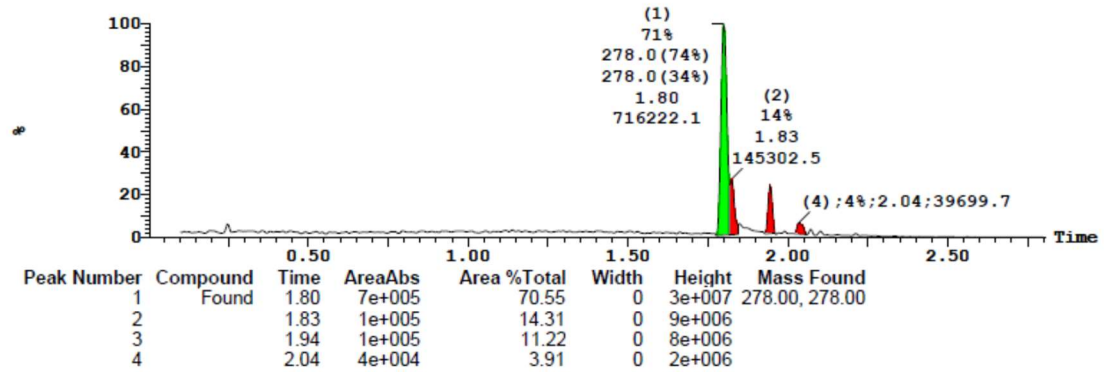

2: MS ES- :BPI Smooth (Mn, 2x3)

2.1e+006

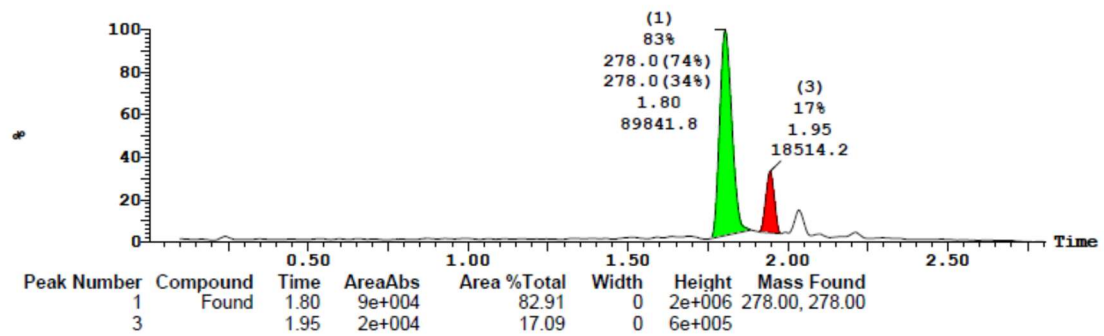

3: UV Detector: TIC

4.731e-1  
Range: 4.764e-1

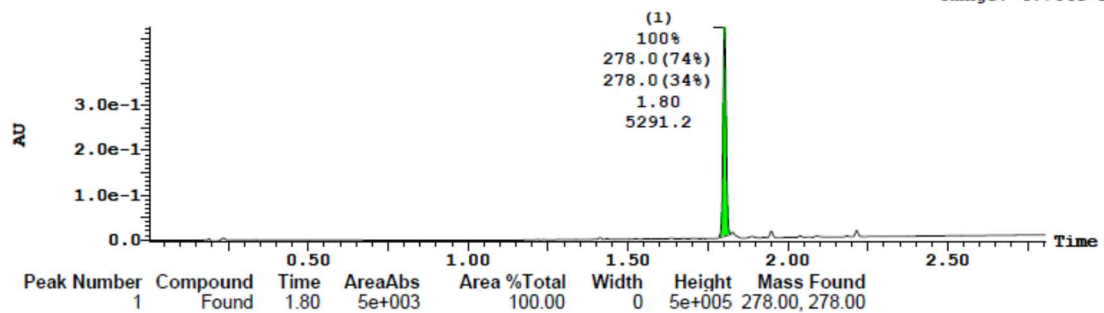

Peak ID Compound Time Mass Found  
1 Found 1.80 279.00,301.00

1: (Time: 1.80) Combine (468:474- (460:463+478:481))

1:MS ES+  
2.4e+007

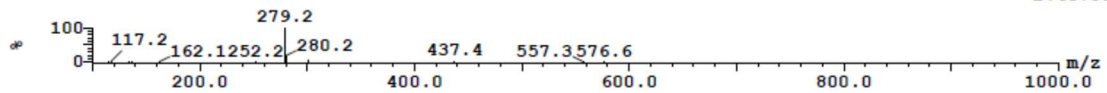

Peak ID Compound Time Mass Found  
1 Found 1.80 277.00

1: (Time: 1.80) Combine (468:473- (460:462+478:480))

2:MS ES-  
2.4e+006

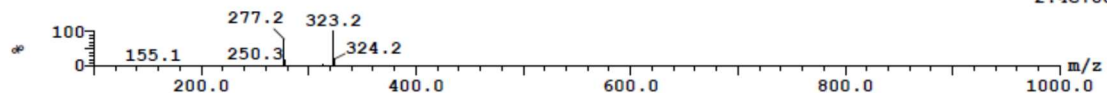

Figure S.91 – Details of UPLC-MS report of compound (11) using generic method.

1: MS ES+ :BPI Smooth (SG, 2x2)

6.6e+006

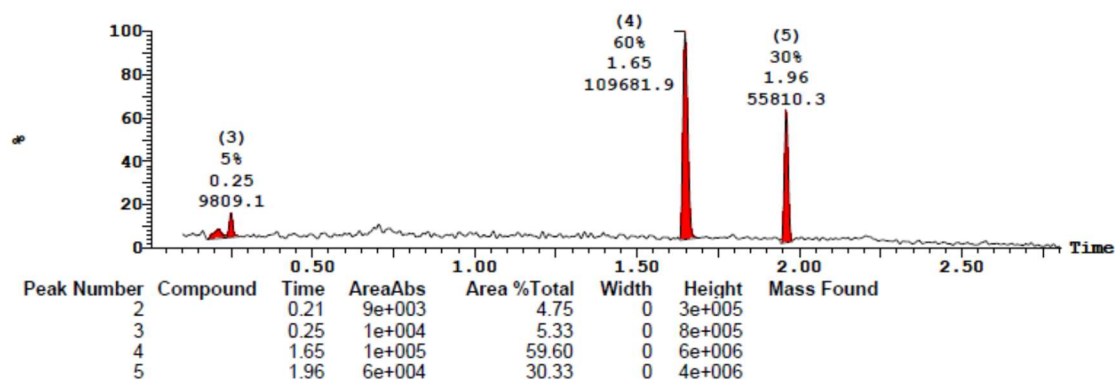

2: MS ES- :BPI Smooth (Mn, 2x3)

4.1e+005

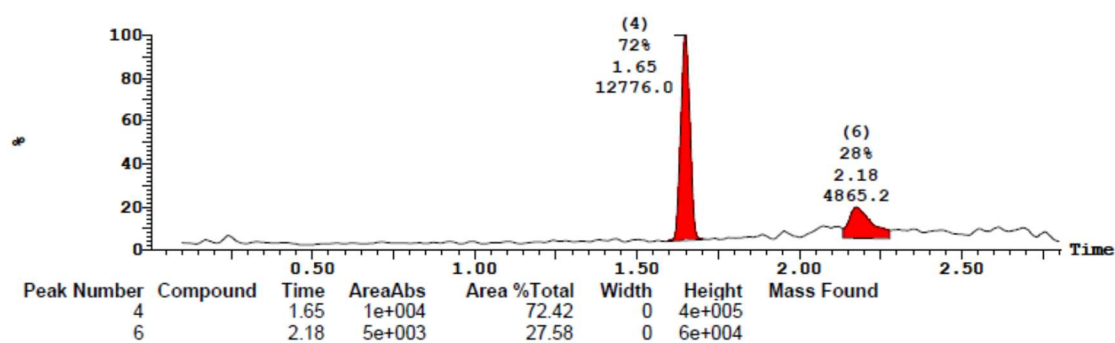

3: UV Detector: TIC

5.074e-1  
Range: 5.109e-1

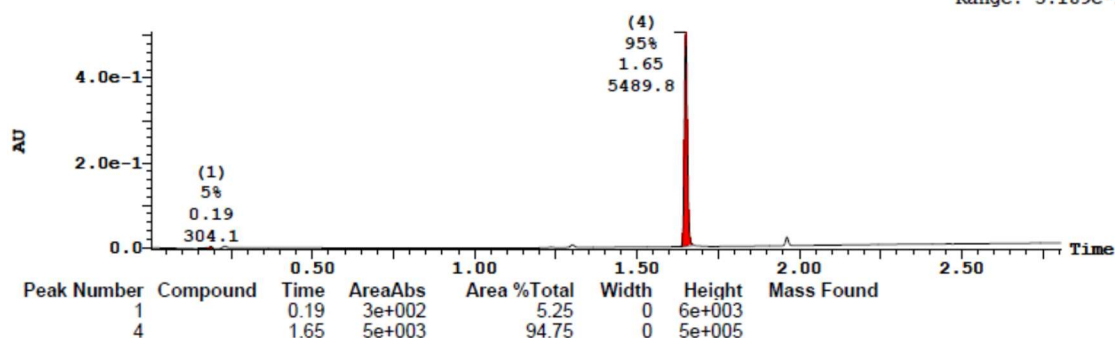

Peak ID Compound Time Mass Found  
4 1.65

4: (Time: 1.65) Combine (429:434-(421:424+441:444))

1: MS ES+  
4.6e+006

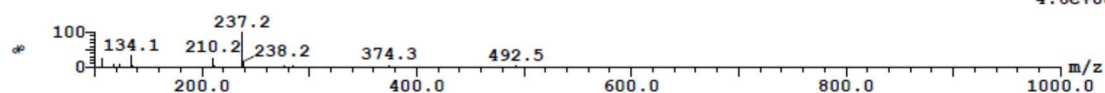

Peak ID Compound Time Mass Found  
4 1.65

4: (Time: 1.65) Combine (428:433-(421:423+440:443))

2: MS ES-  
5.2e+005

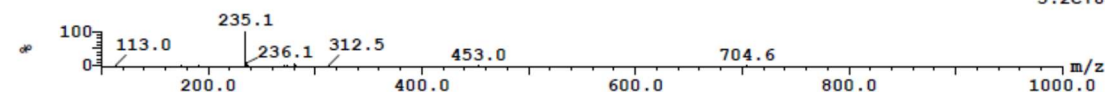

Figure S.92 – Details of UPLC-MS report of compound (12) using generic method.

Sample 1 Vial 2:33 ID PSG2018-044-1fr13 File PSG2018-044-1fr13 Date 13-Sep-2018 Time 11:34:03 Description

1: MS ES+ :BPI Smooth (SG, 2x2)

1.3e+007

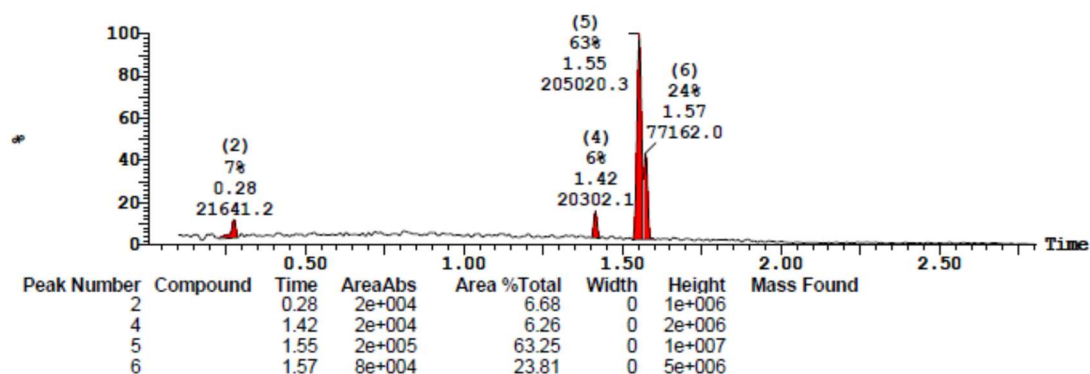

2: MS ES- :BPI Smooth (Mn, 2x3)

1.4e+005

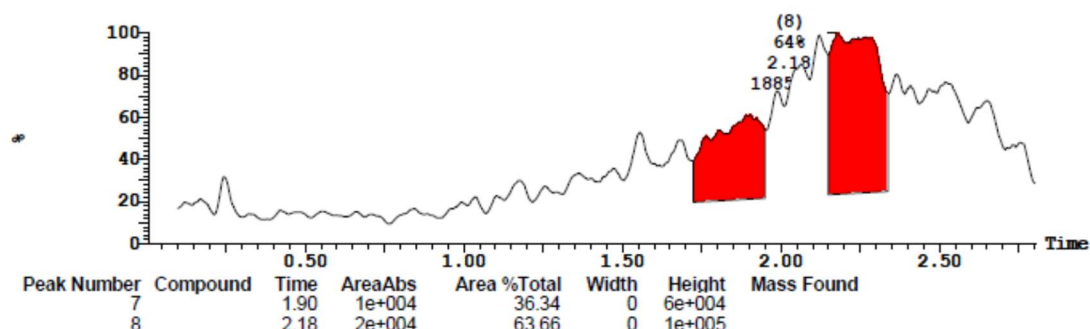

3: UV Detector: TIC

2.258e-1  
Range: 2.288e-1

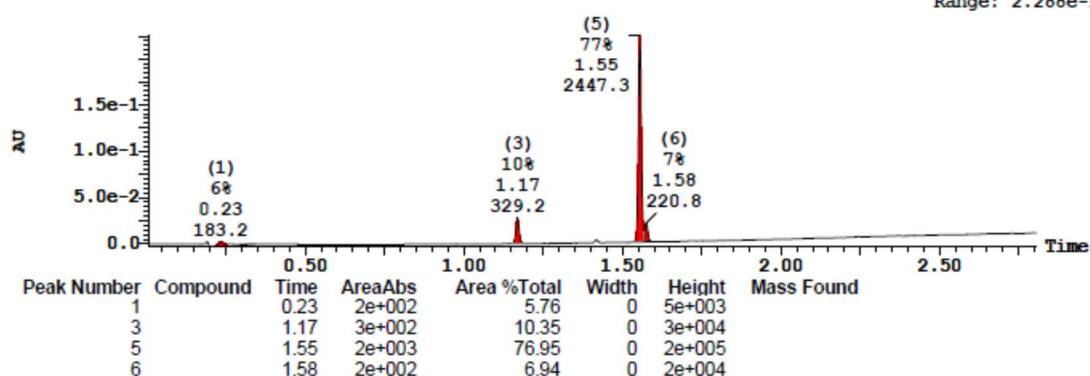

Peak ID Compound Time Mass Found

5: (Time: 1.55) Combine (404:409-(394:397+413:415))

1:MS ES+  
8.7e+006

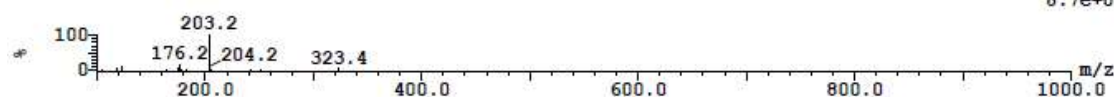

5: (Time: 1.55) Combine (403:409-(394:396+412:415))

2:MS ES-  
4.7e+004

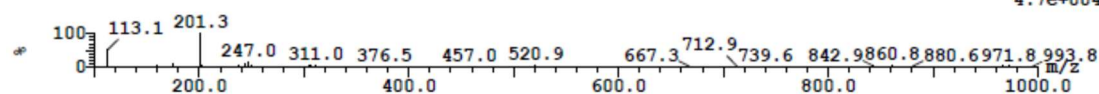

Figure S.93 – Details of UPLC-MS report of compound (13) using generic method.

Sample 1 Vial 1:30 ID PSG2018-056-1nmr File PSG2018-056-1nmr Date 09-Nov-2018 Time 14:26:29 Description

1: MS ES+ :BPI Smooth (SG, 2x2)

9.5e+006

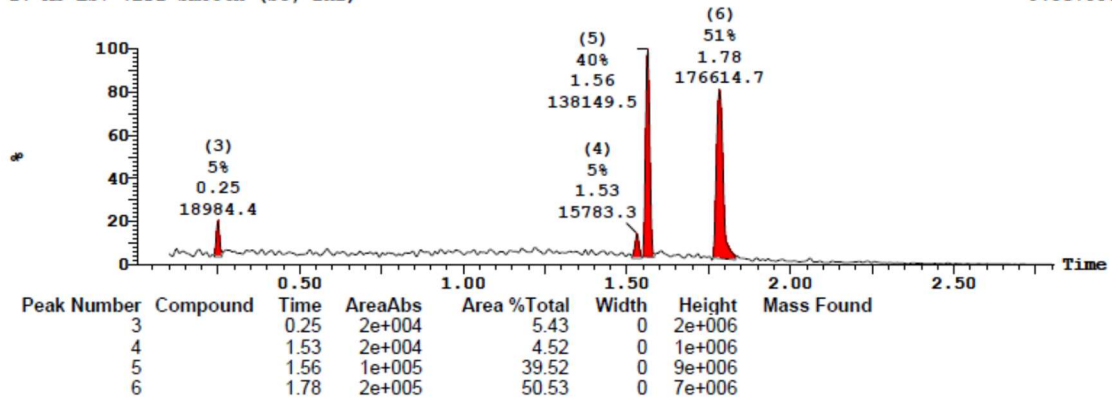

2: MS ES- :BPI Smooth (Mn, 2x3)

2.8e+006

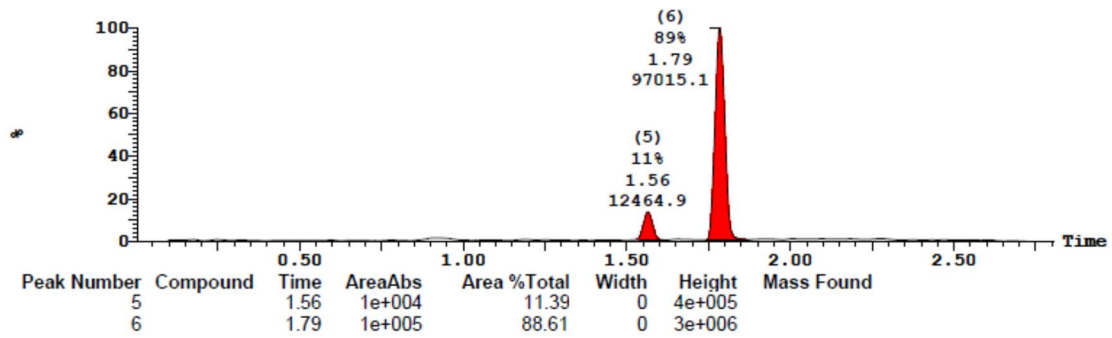

3: UV Detector: TIC

2.11e-1  
Range: 2.142e-1

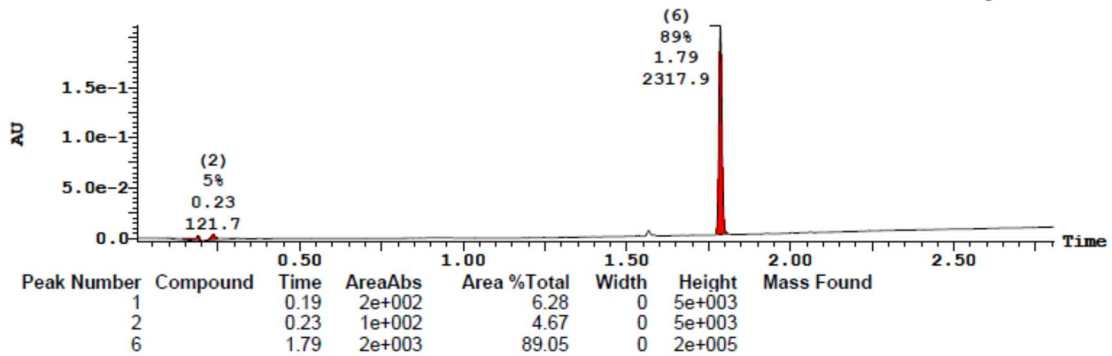

Peak ID Compound Time Mass Found  
5 1.56

5: (Time: 1.56) Combine (406:412- (400:402+417:419))

1: MS ES+  
5.3e+006

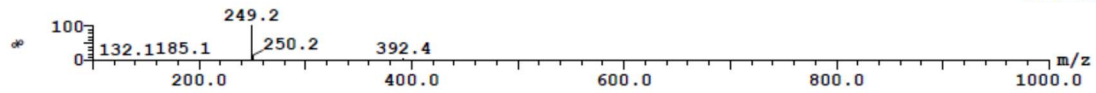

Peak ID Compound Time Mass Found  
6 1.78

6: (Time: 1.79) Combine (464:469- (456:459+475:478))

1: MS ES+  
6.2e+006

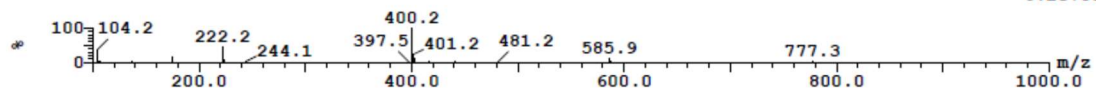

Figure S.94 – Details of UPLC-MS report of compound (14) using generic method.



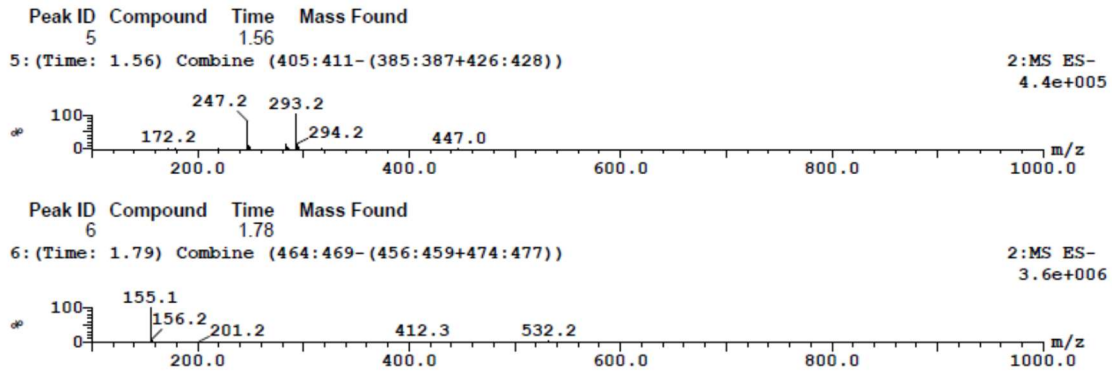

Figure S.95 – Details of UPLC-MS report of compound (14) using generic method (continued).

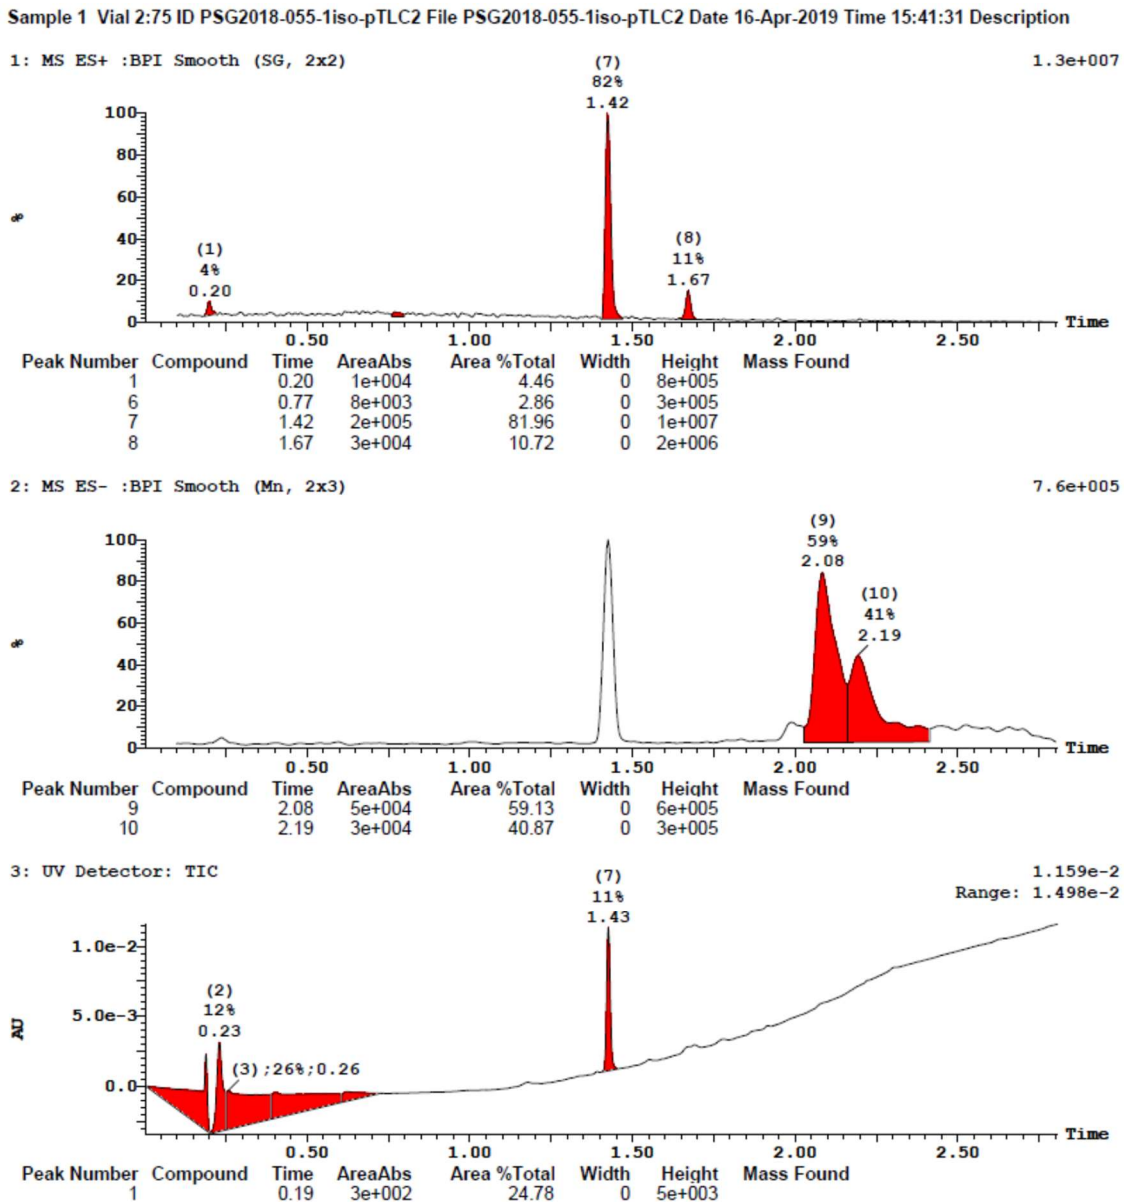

Figure S.96 – Details of UPLC-MS report of compound (15) using generic method; peaks number 9 and 10 are present in every run when the sample is diluted or does not produce strong MS signals.

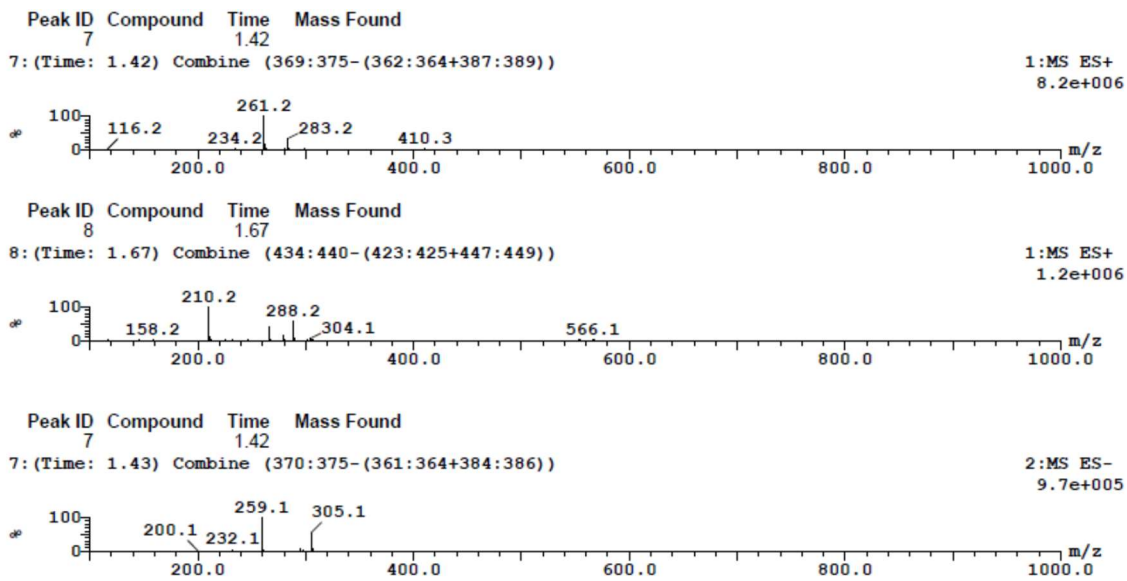

Figure S.97 – Details of UPLC-MS report of compound (15) using generic method (continued).

Sample 1 Vial 2:36 ID PSG-brnmr1 File PSG-brnmr1 Date 21-Nov-2018 Time 10:38:27 Description

1: MS ES+ :BPI Smooth (SG, 2x2)

1.0e+007

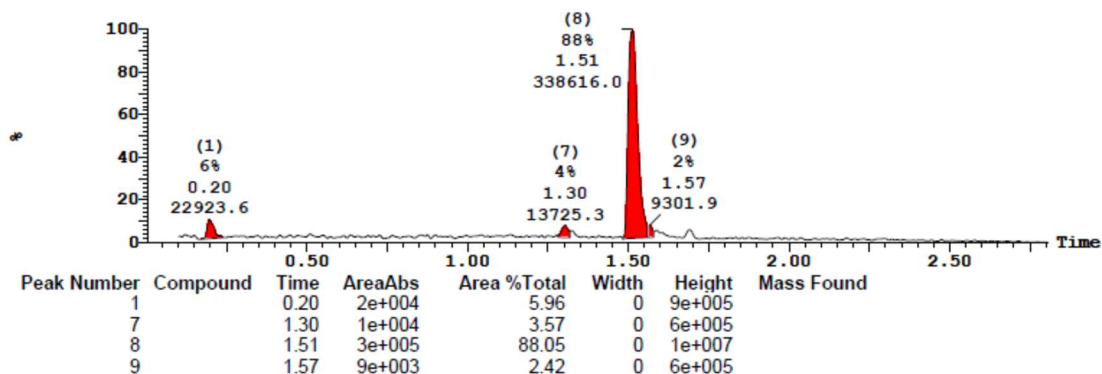

2: MS ES- :BPI Smooth (Mn, 2x3)

1.2e+006

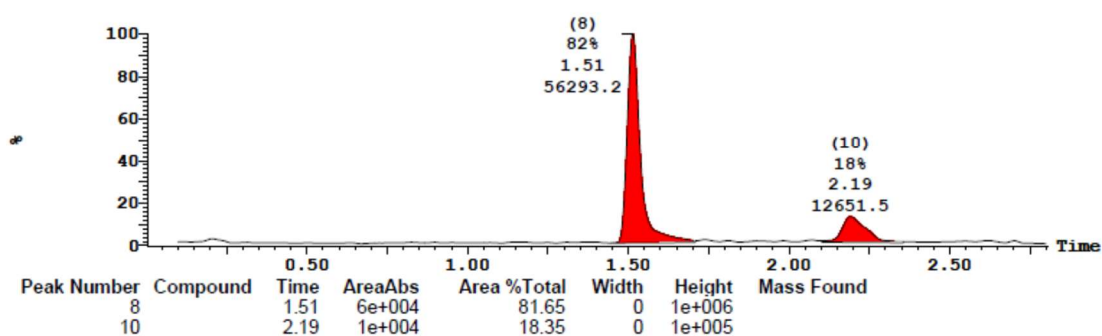

3: UV Detector: TIC

1.429e-2  
Range: 1.521e-2

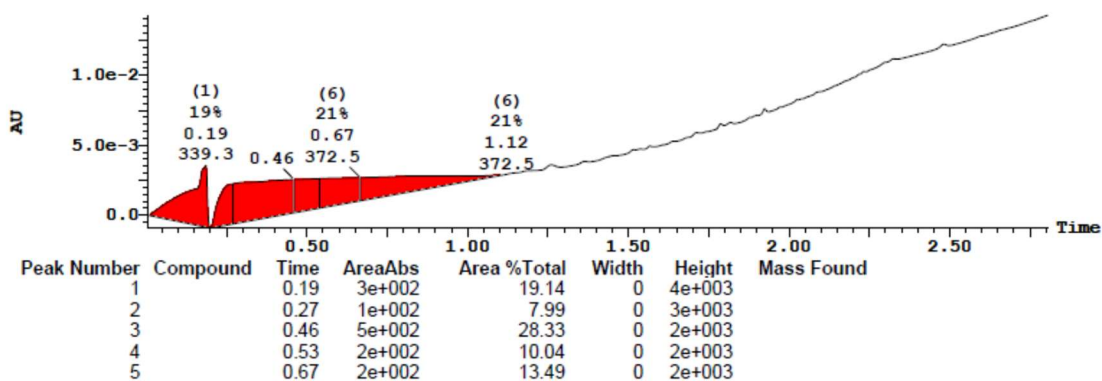

Peak ID Compound Time Mass Found

9: (Time: 1.57) Combine (407:413- (403:405+416:418))

1:MS ES+  
7.7e+004

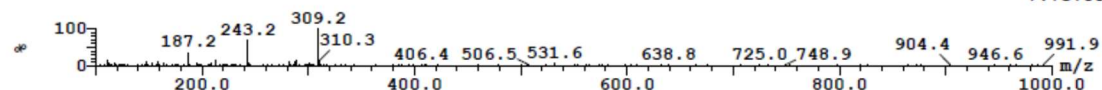

Peak ID Compound Time Mass Found

8: (Time: 1.51) Combine (392:398- (372:374+449:451))

2:MS ES-  
1.3e+006

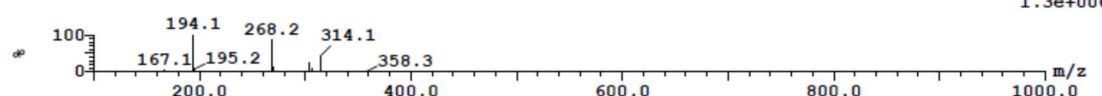

Figure S.98 – Details of UPLC-MS report of compound (16) using generic method; peak 10 is present in every run when the sample is diluted or does not produce strong MS signals.

1: MS ES+ :BPI Smooth (SG, 2x2)

7.2e+006

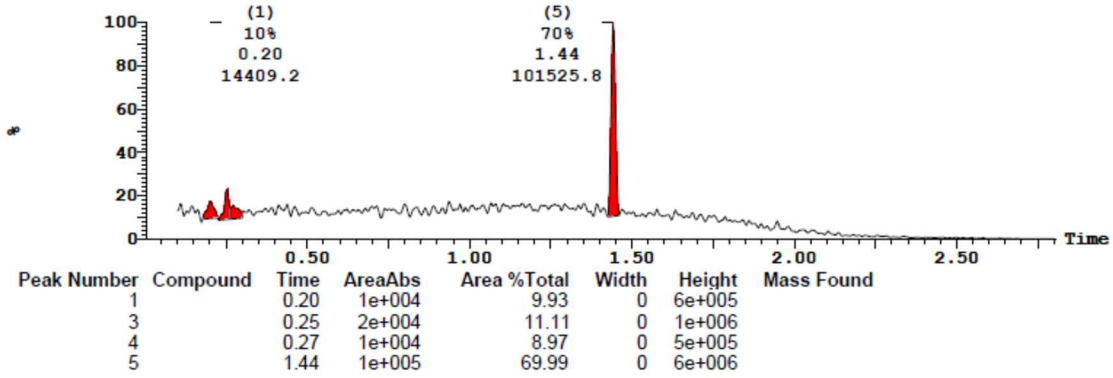

2: MS ES- :BPI Smooth (Mn, 2x3)

5.3e+004

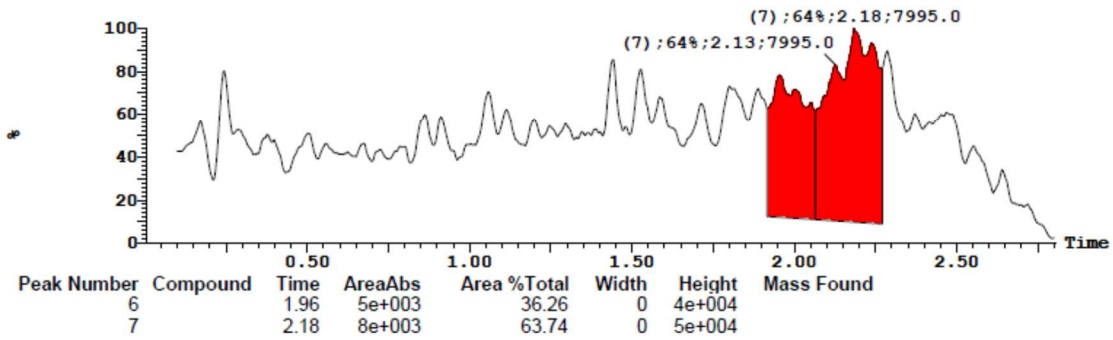

3: UV Detector: TIC

1.126e-2  
Range: 1.411e-2

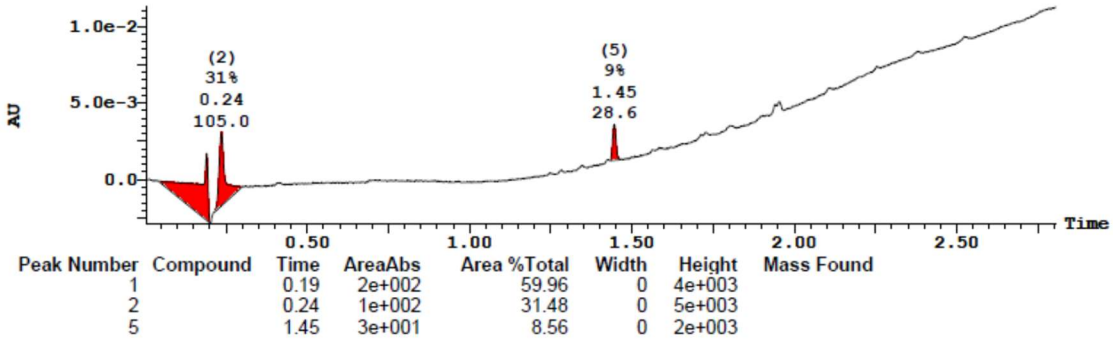

Peak ID Compound Time Mass Found  
5 1.44

5: (Time: 1.44) Combine (374:380-(368:370+385:387))

1: MS ES+  
4.4e+006

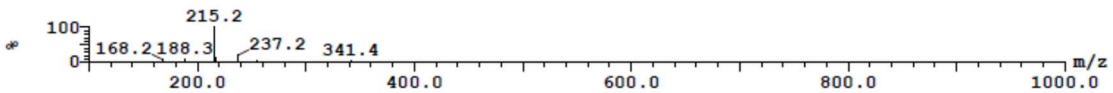

Peak ID Compound Time Mass Found  
5 1.44

5: (Time: 1.45) Combine (375:380-(369:372+385:387))

2: MS ES-  
4.6e+004

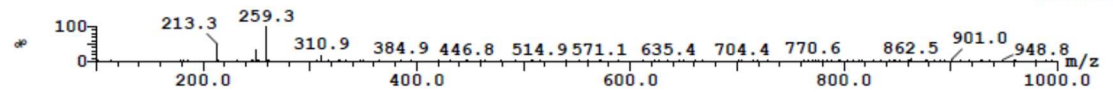

Figure S.99 – Details of UPLC-MS report of compound (18) using generic method.

Sample 1 Vial 1:34 ID PSG2018-061-1fr11 File PSG2018-061-1fr11 Date 08-Jan-2019 Time 16:15:26 Description

1: MS ES+ :BPI Smooth (SG, 2x2)

3.1e+006

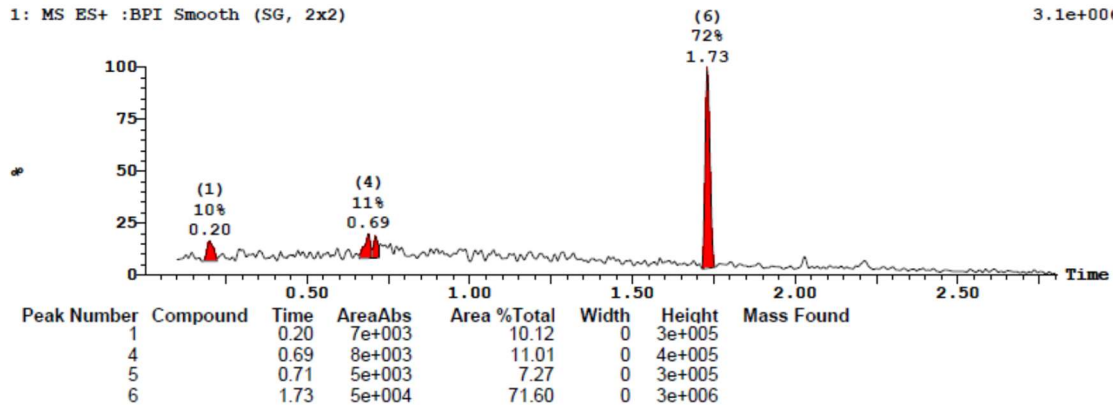

2: MS ES- :BPI Smooth (Mn, 2x3)

3.1e+005

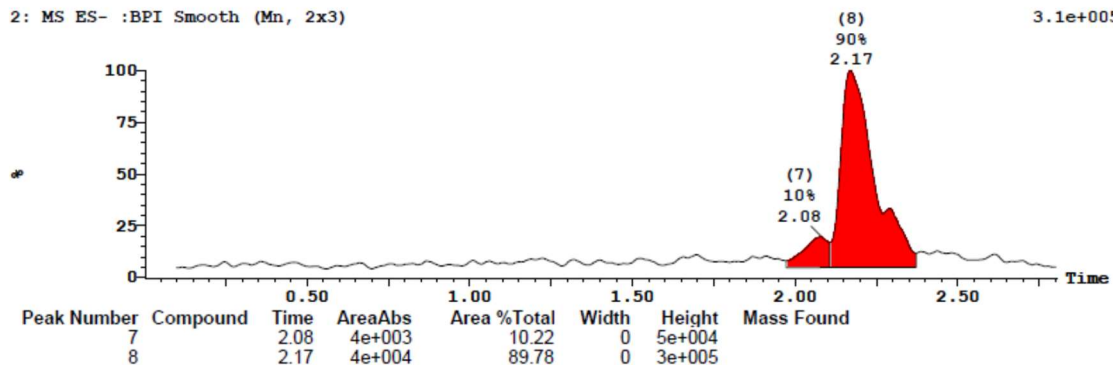

3: UV Detector: TIC

1.506e-2

Range: 1.792e-2

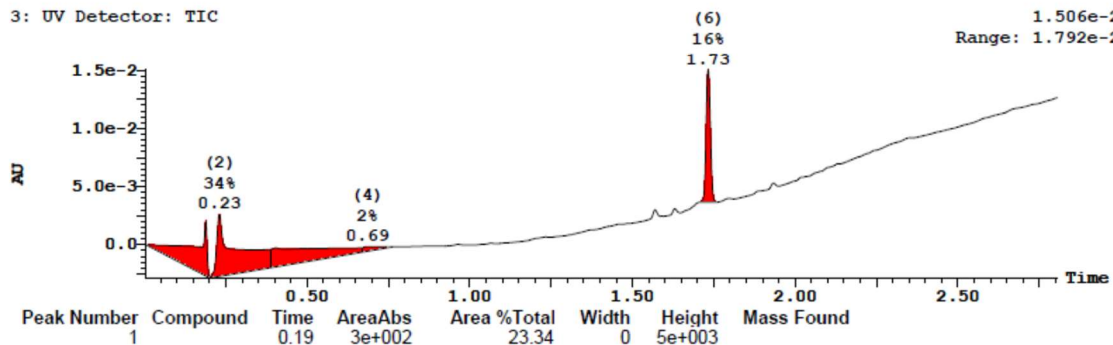

Peak ID Compound Time Mass Found

6 1.73

6: (Time: 1.73) Combine (449:455-(443:445+461:463))

1:MS ES+  
1.9e+006

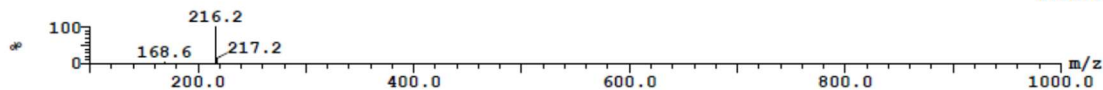

**Figure S.100** – Details of UPLC-MS report of compound (19) using generic method; peak 7 and 8 is present in every run when the sample is diluted or does not produce strong MS signals.

Sample 1 Vial 2:96 ID PSG2018-050-3prepTLC3 File PSG2018-050-3prepTLC3 Date 06-Feb-2019 Time 14:22:35 Description

1: MS ES+ :BPI Smooth (SG, 2x2) 5.0e+006

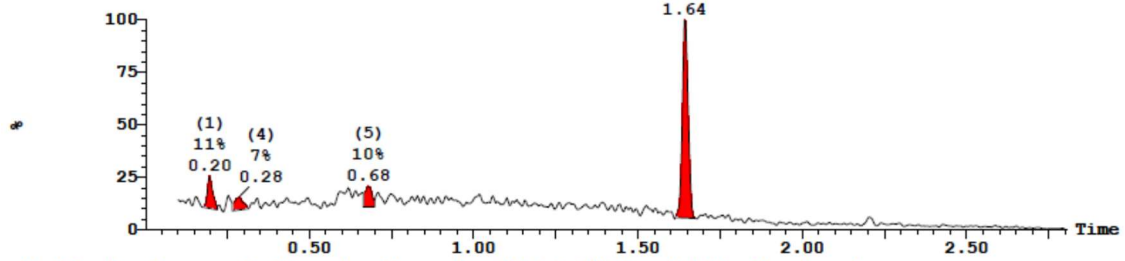

2: MS ES- :BPI Smooth (Mn, 2x3) 7.6e+005

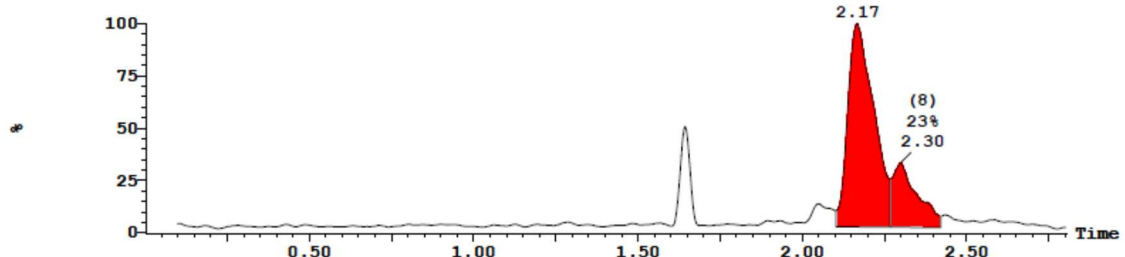

3: UV Detector: TIC

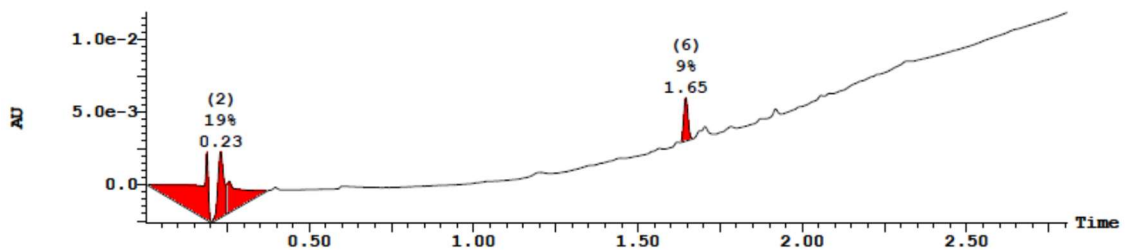

Peak ID Compound Time Mass Found

6: (Time: 1.64) Combine (426:432-(417:419+441:443))

1:MS ES+  
3.3e+006

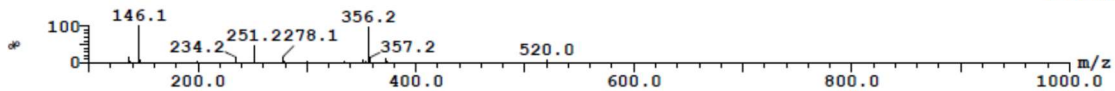

Peak ID Compound Time Mass Found

6: (Time: 1.65) Combine (427:432-(420:422+438:440))

2:MS ES-  
5.0e+005

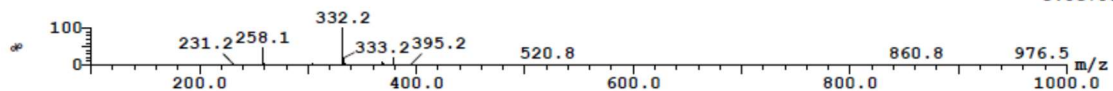

Figure S.101 – Details of UPLC-MS report of compound (20) using generic method; peak 7 and 8 are present in every run when the sample is diluted or does not produce strong MS signals.

Sample 1 Vial 2:28 ID PSG2018-031-1pTLCfr40-45 File PSG2018-031-1pTLCfr40-45 Date 07-Jun-2018 Time 16:31:44 Description

1: MS ES+ :BPI Smooth (SG, 2x2)

4.6e+006

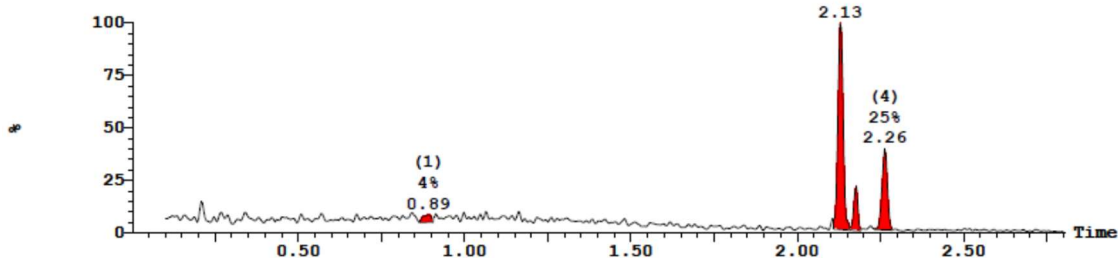

| Peak Number | Compound | Time | AreaAbs | Area %Total | Width | Height | Mass Found |
|-------------|----------|------|---------|-------------|-------|--------|------------|
| 1           |          | 0.89 | 5e+003  | 3.69        | 0     | 2e+005 |            |
| 2           |          | 2.13 | 8e+004  | 61.51       | 0     | 5e+006 |            |
| 3           |          | 2.18 | 1e+004  | 10.18       | 0     | 1e+006 |            |
| 4           |          | 2.26 | 3e+004  | 24.62       | 0     | 2e+006 |            |

2: MS ES- :BPI Smooth (Mn, 2x3)

3.2e+005

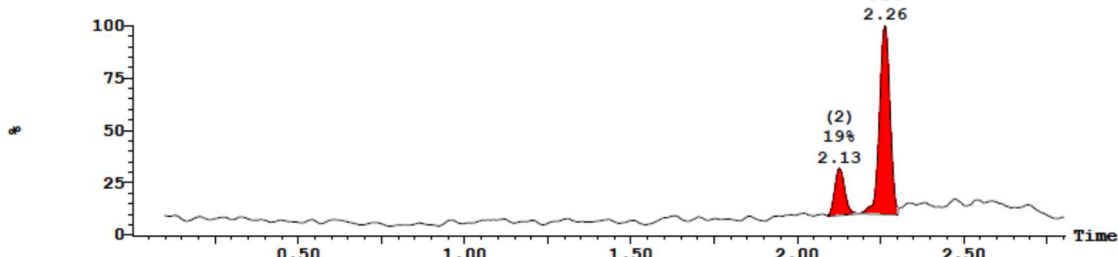

| Peak Number | Compound | Time | AreaAbs | Area %Total | Width | Height | Mass Found |
|-------------|----------|------|---------|-------------|-------|--------|------------|
| 2           |          | 2.13 | 2e+003  | 19.16       | 0     | 7e+004 |            |
| 4           |          | 2.26 | 1e+004  | 80.84       | 0     | 3e+005 |            |

3: UV Detector: TIC

4.72e-1  
Range: 4.742e-1

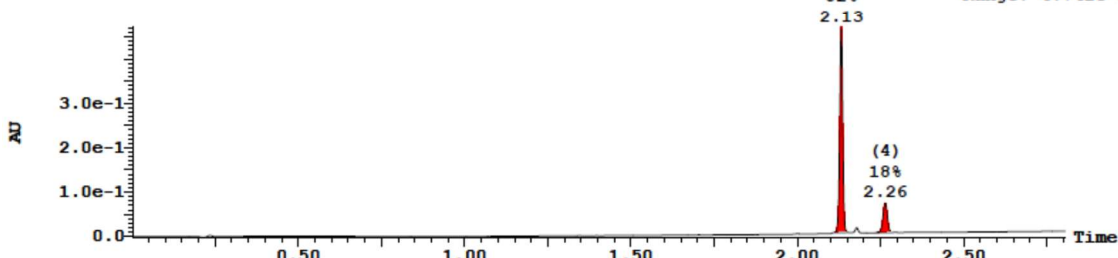

| Peak Number | Compound | Time | AreaAbs | Area %Total | Width | Height | Mass Found |
|-------------|----------|------|---------|-------------|-------|--------|------------|
| 2           |          | 2.13 | 5e+003  | 82.33       | 0     | 5e+005 |            |

PeakID Compound Time Mass Found  
2 2.13

2: (Time: 2.13) Combine (555:560-(547:549+565:567))

1:MS ES+  
3.0e+006

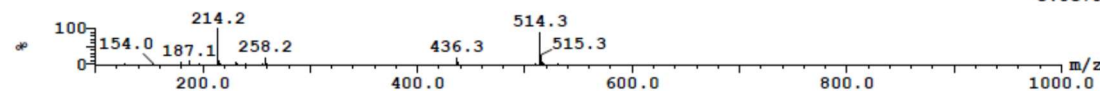

4: (Time: 2.26) Combine (588:594-(578:580+600:602))

1:MS ES+  
1.2e+006

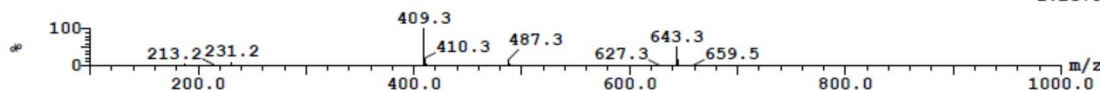

Figure S.102 – Details of UPLC-MS report of compound (21) using generic method.

1: MS ES+ :BPI Smooth (SG, 2x2)

8.3e+006

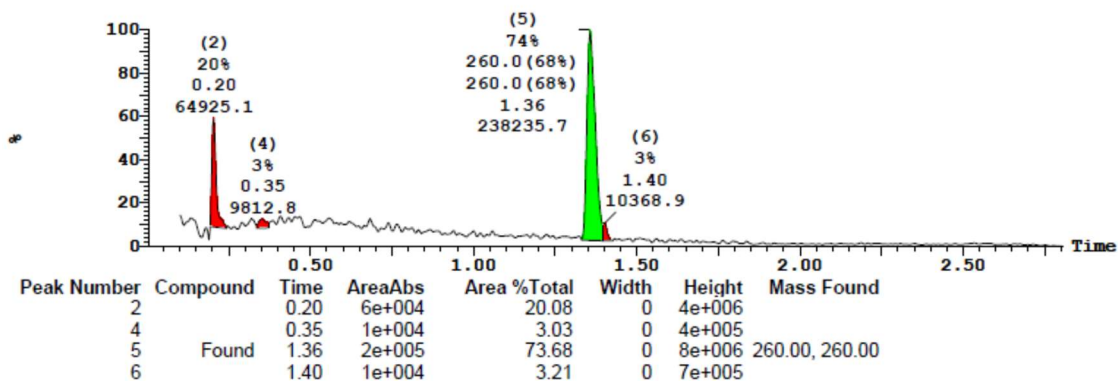

2: MS ES- :BPI Smooth (Mn, 2x3)

2.8e+006

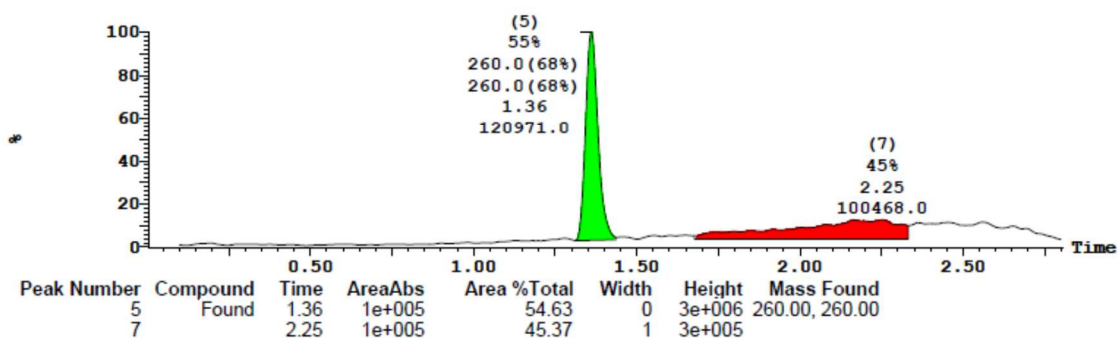

3: UV Detector: TIC

1.582e-2  
Range: 1.766e-2

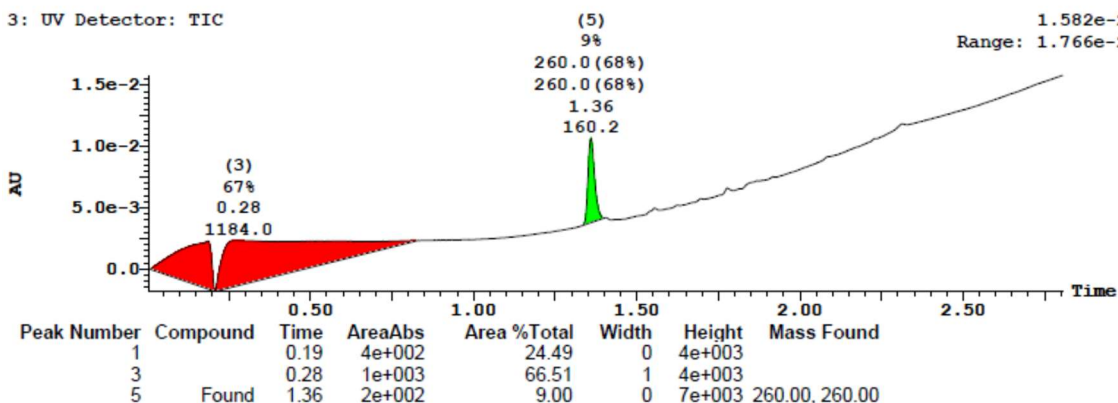

Peak ID Compound Time Mass Found  
5 Found 1.36 261.00,283.00

5: (Time: 1.36) Combine (352:358-(343:345+368:370))

1:MS ES+  
6.5e+006

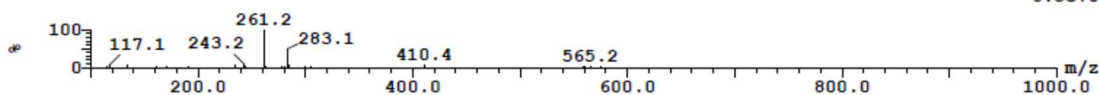

Peak ID Compound Time Mass Found  
5 Found 1.36 259.00

5: (Time: 1.36) Combine (353:359-(337:339+378:380))

2:MS ES-  
3.1e+006

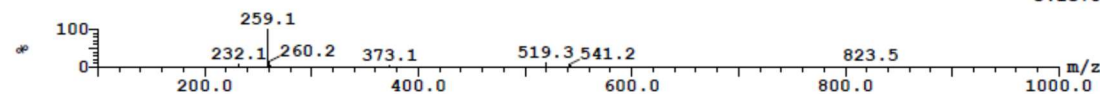

Figure S.103 – Details of UPLC-MS report of compound (22) using generic method.



Sample 1 Vial 1:64 ID PSG2018-049-2fr12 File PSG2018-049-2fr12 Date 11-Dec-2018 Time 10:18:05 Description

1: MS ES+ :BPI Smooth (SG, 2x2)

1.1e+007

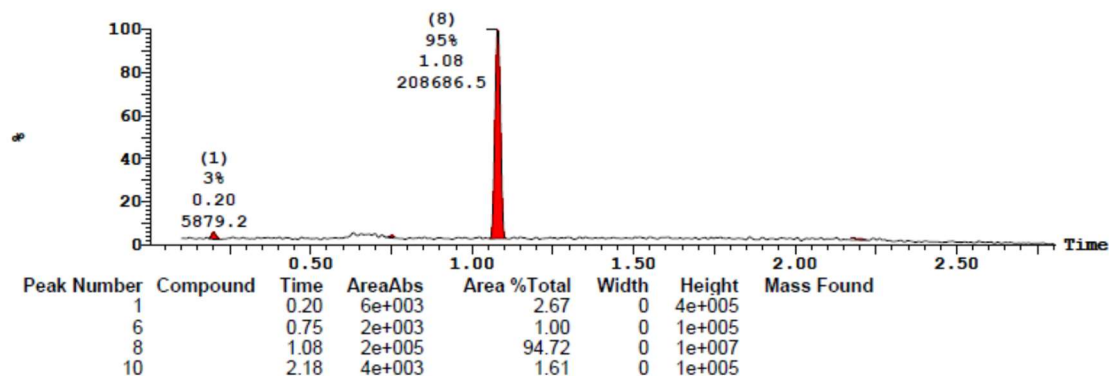

2: MS ES- :BPI Smooth (Mn, 2x3)

5.0e+005

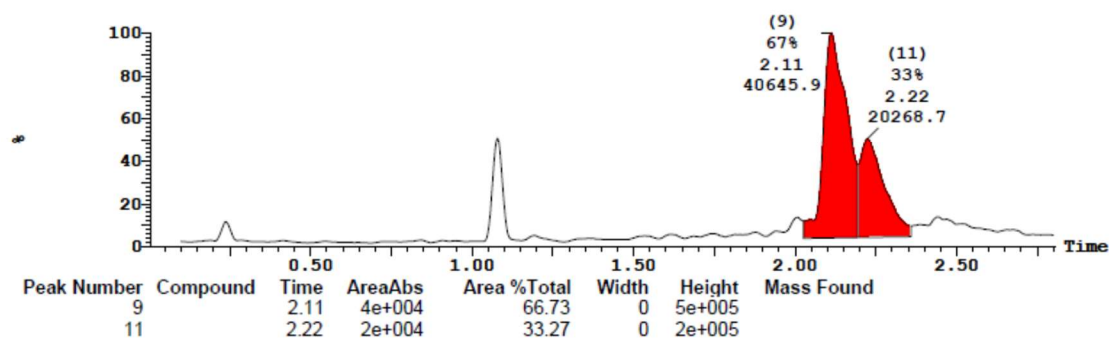

3: UV Detector: TIC

3.631e-2  
Range: 3.913e-2

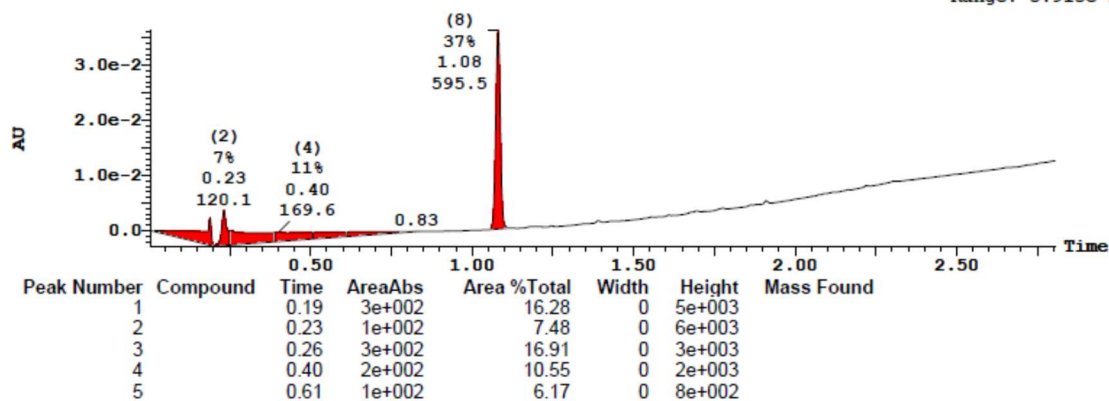

Peak ID Compound Time Mass Found

8 (Time: 1.08) Combine (279:285- (271:273+292:294))

1:MS ES+  
7.6e+006

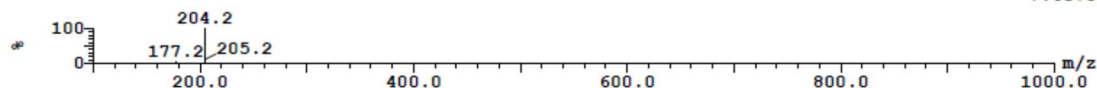

Peak ID Compound Time Mass Found

8 (Time: 1.08) Combine (280:285- (269:272+294:296))

2:MS ES-  
3.1e+005

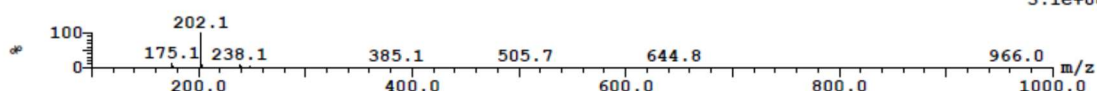

Figure S.104 – Details of UPLC-MS report of compound (23) using generic method; peak 9 and 11 is present in every run when the sample is diluted or does not produce strong MS signals.

Sample 1 Vial 2:28 ID PSG2018-053-2fr17 File PSG2018-053-2fr17 Date 19-Dec-2018 Time 14:27:33 Description

1: MS ES+ :BPI Smooth (SG, 2x2)

2.3e+007

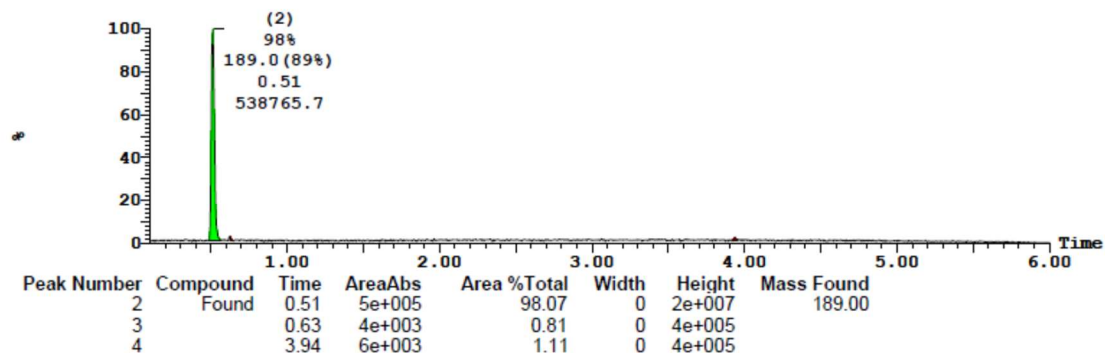

2: UV Detector: TIC

8.682e-2  
Range: 8.781e-2

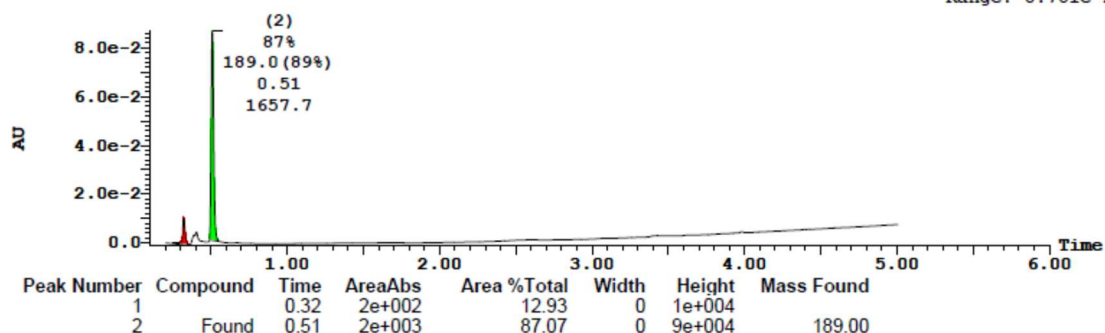

Peak ID Compound Time Mass Found

2: (Time: 0.51) Combine (241:251-(224:229+279:284))

1:MS ES+  
1.9e+007

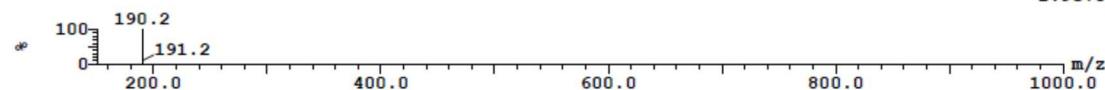

Figure S.105 – Details of UPLC-MS report of compound (23) using purity method.

## FT-IR Chromatograms for Selected Compounds

**Note:** the nitrile band is apparently missing (low signal-to-noise ratio) for some compounds; this phenomenon is common with ATR FT-IR (these spectra acquired with a Bruker Alpha Platinum ATR apparatus), due to the high absorbance of diamond in that region (see for example: Larkin, P. J. *Instrumentation and Sampling Methods. In Infrared and Raman Spectroscopy; Second Edition, Elsevier: Amsterdam, 2018; pp 29–61*).

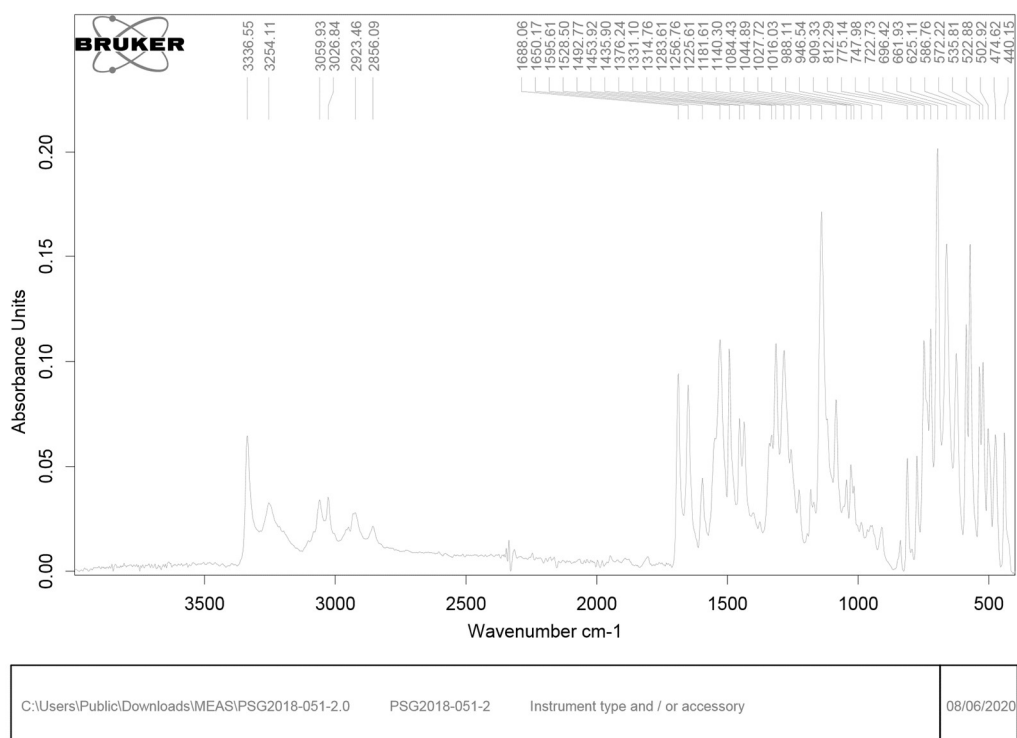

Figure S.106 – FT-IR spectra of compound (11)

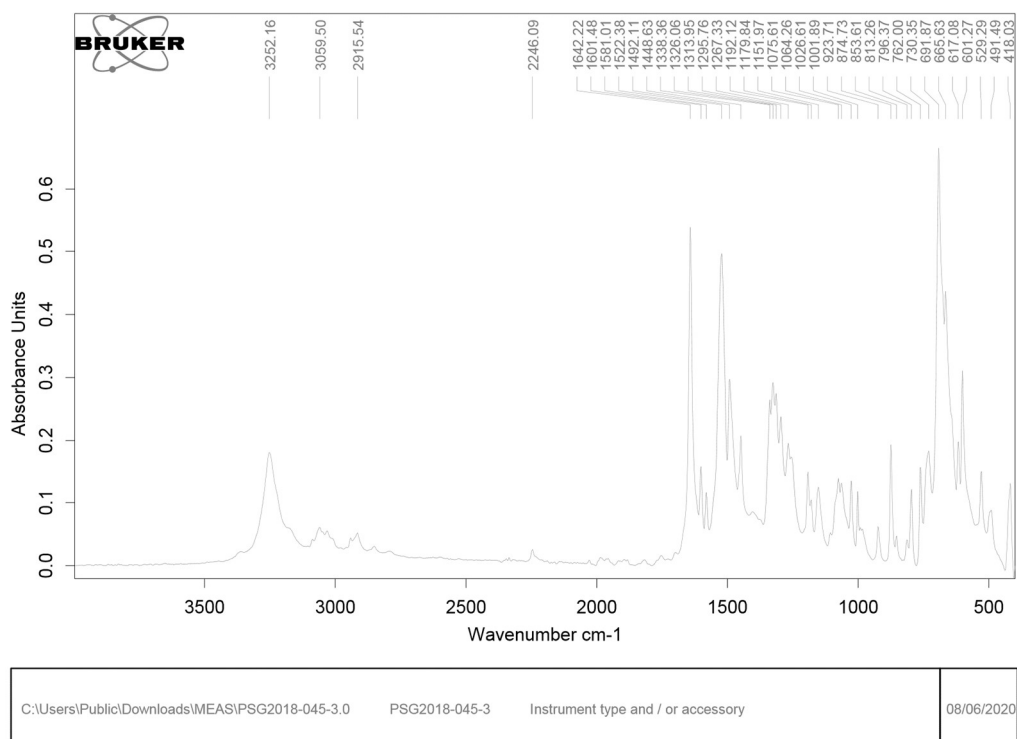

Figure S.107 – FT-IR spectra of compound (12)

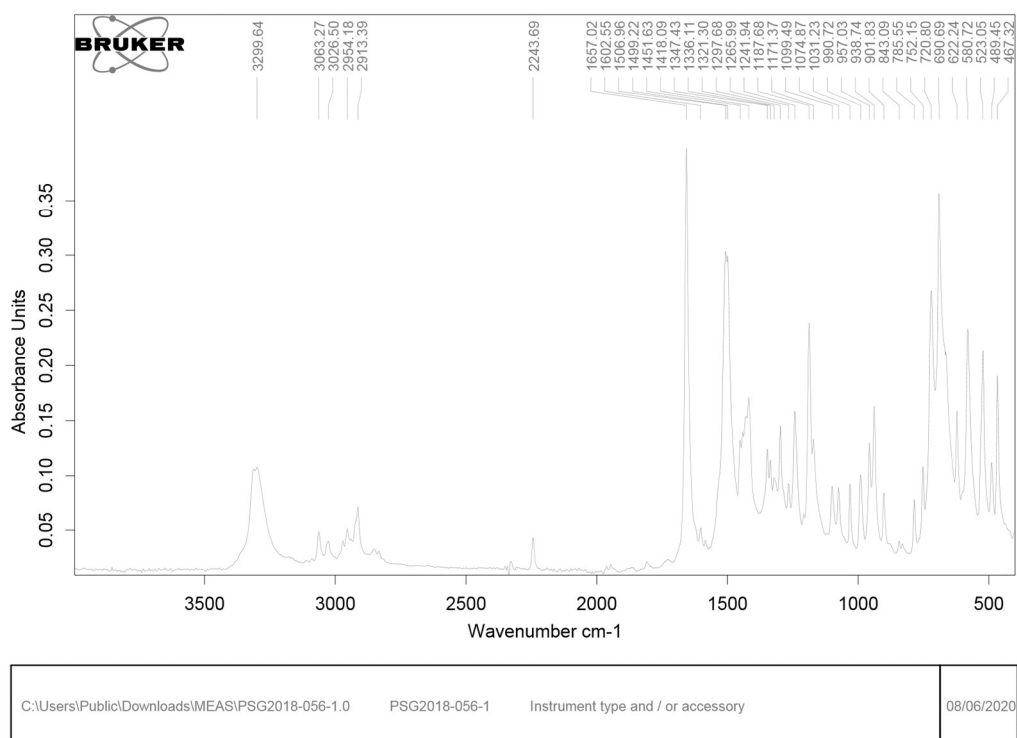

Figure S.108 – FT-IR spectra of compound (14)

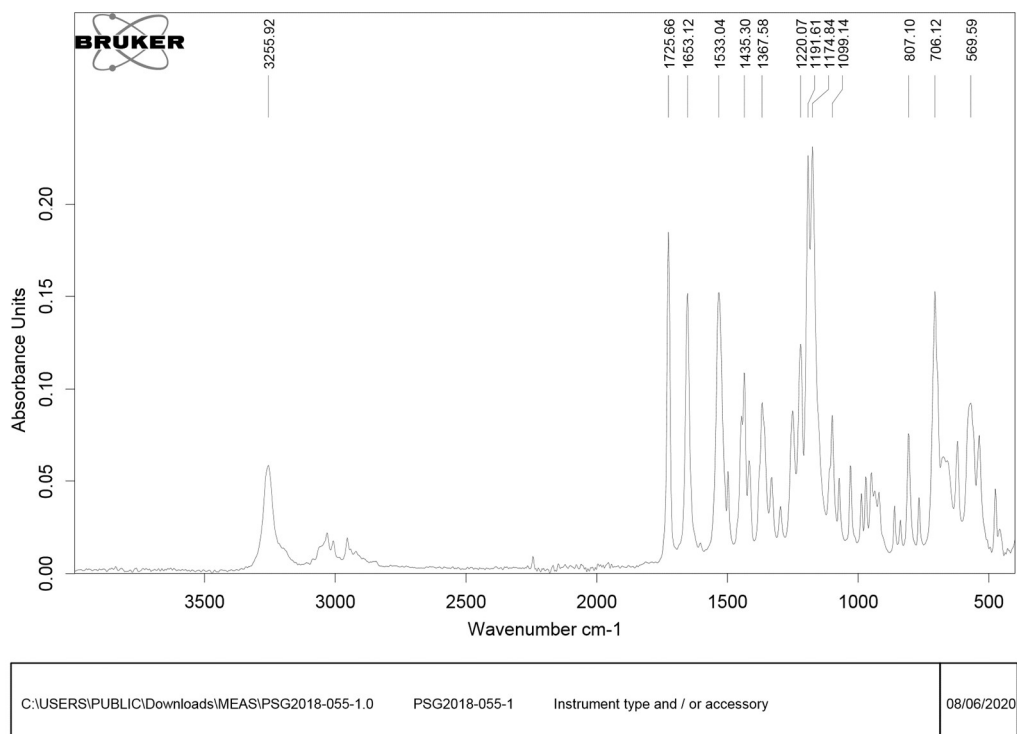

Figure S.109 – FT-IR spectra of compound (15)

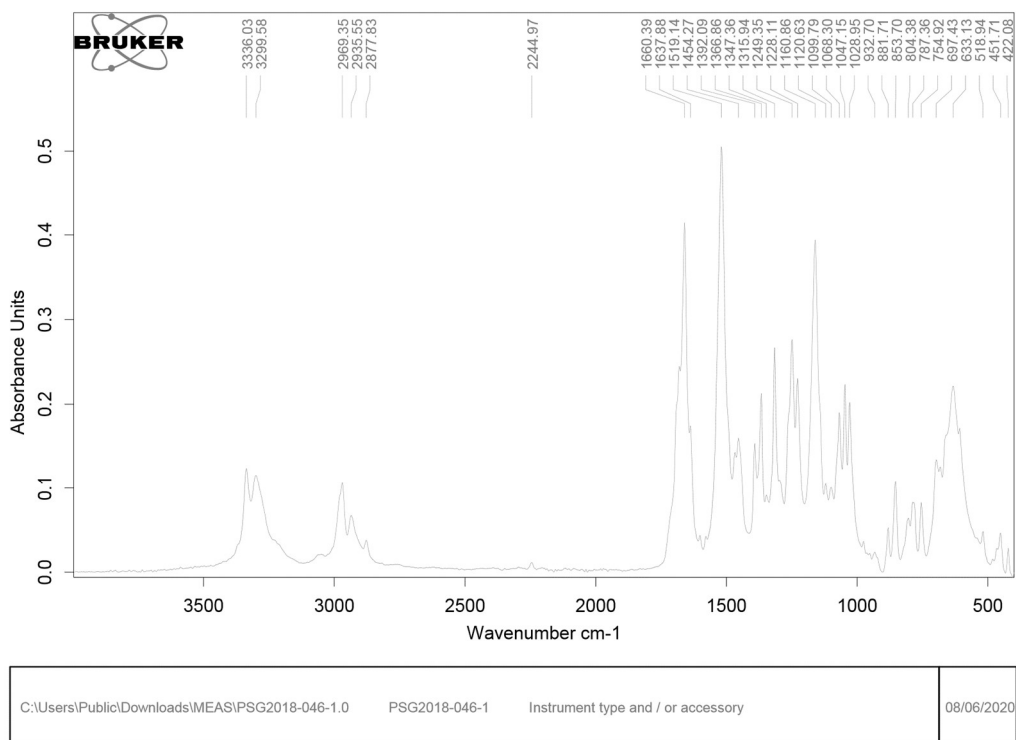

Figure S.110 – FT-IR spectra of compound (16)

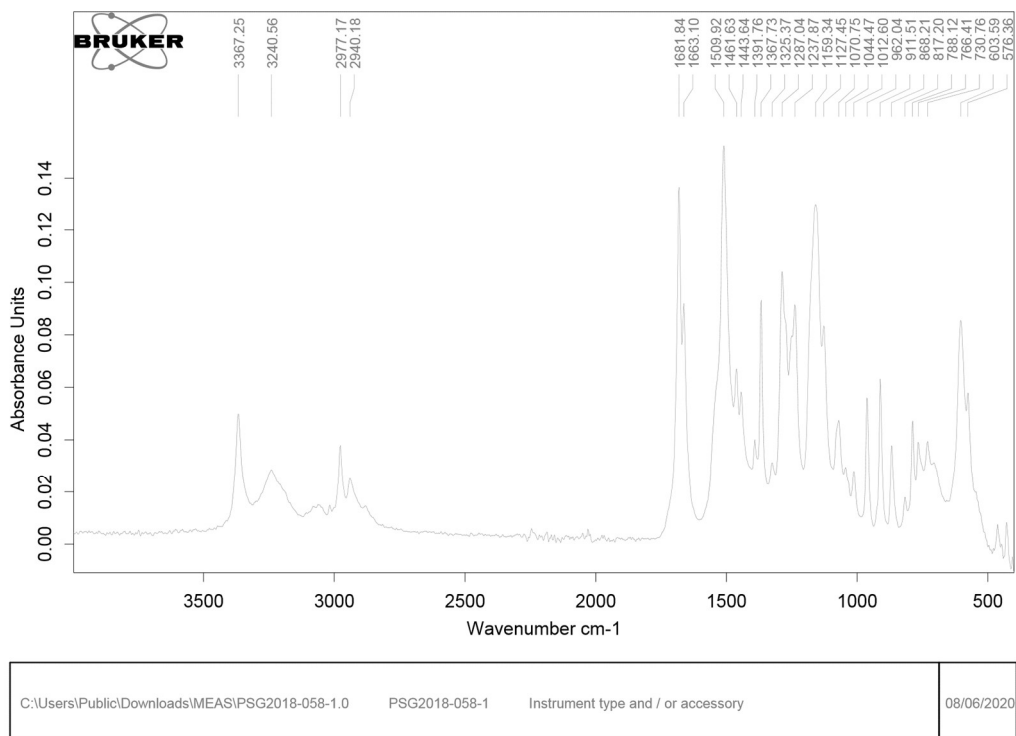

Figure S.111 – FT-IR spectra of compound (17)

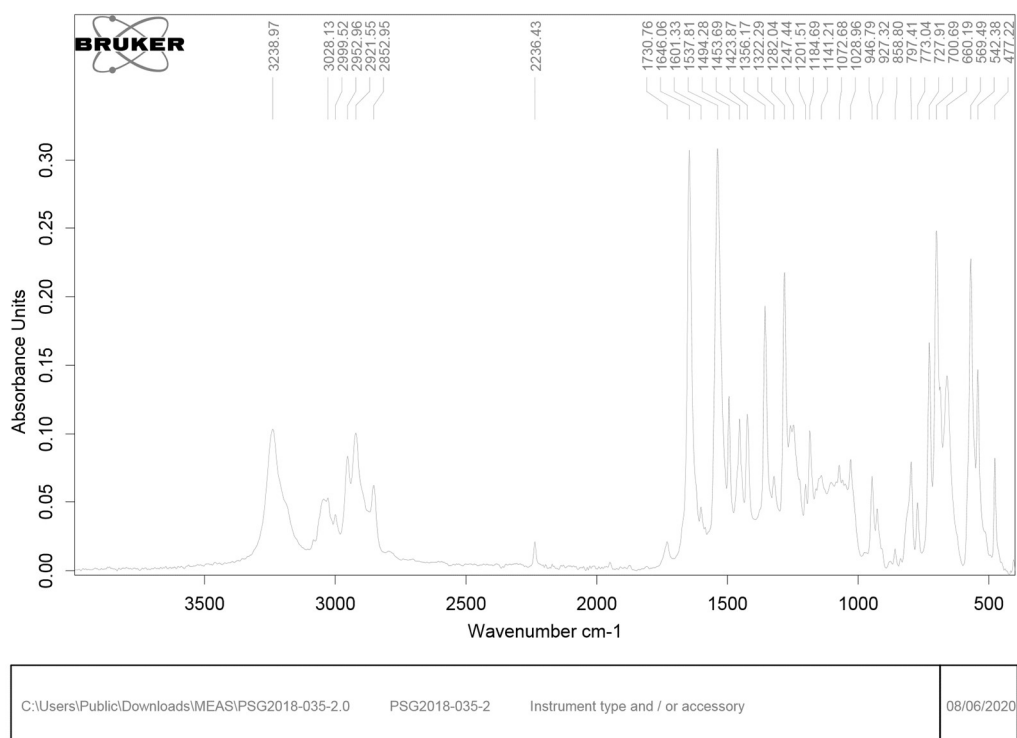

Figure S.112 – FT-IR spectra of compound (18)

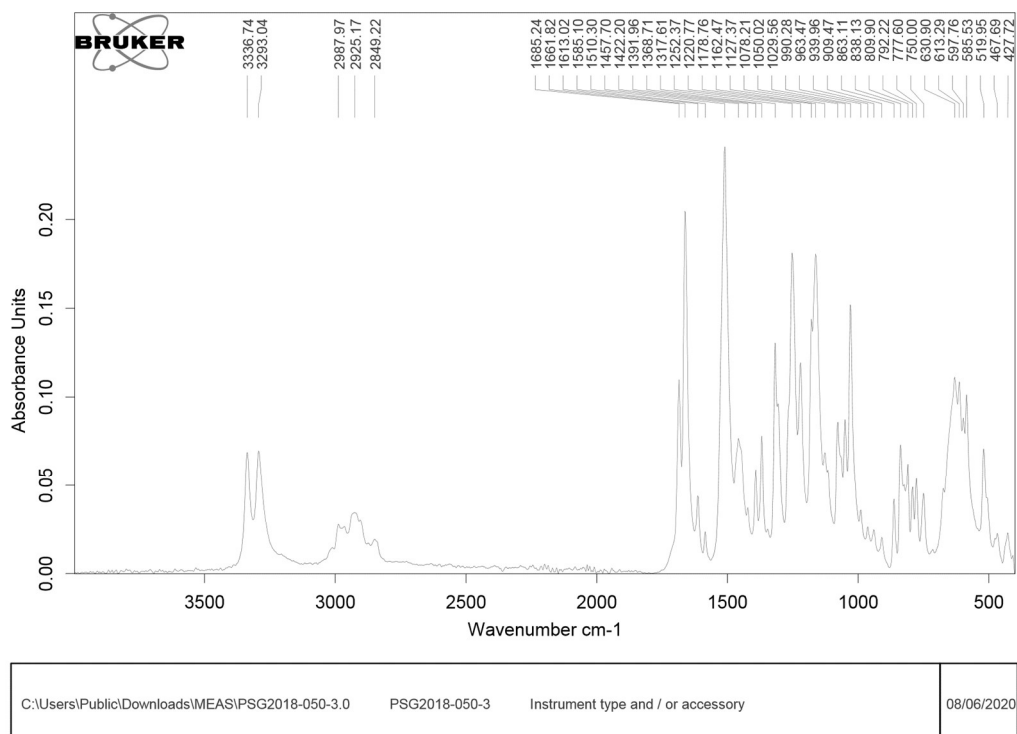

Figure S.113 – FT-IR spectra of compound (20)

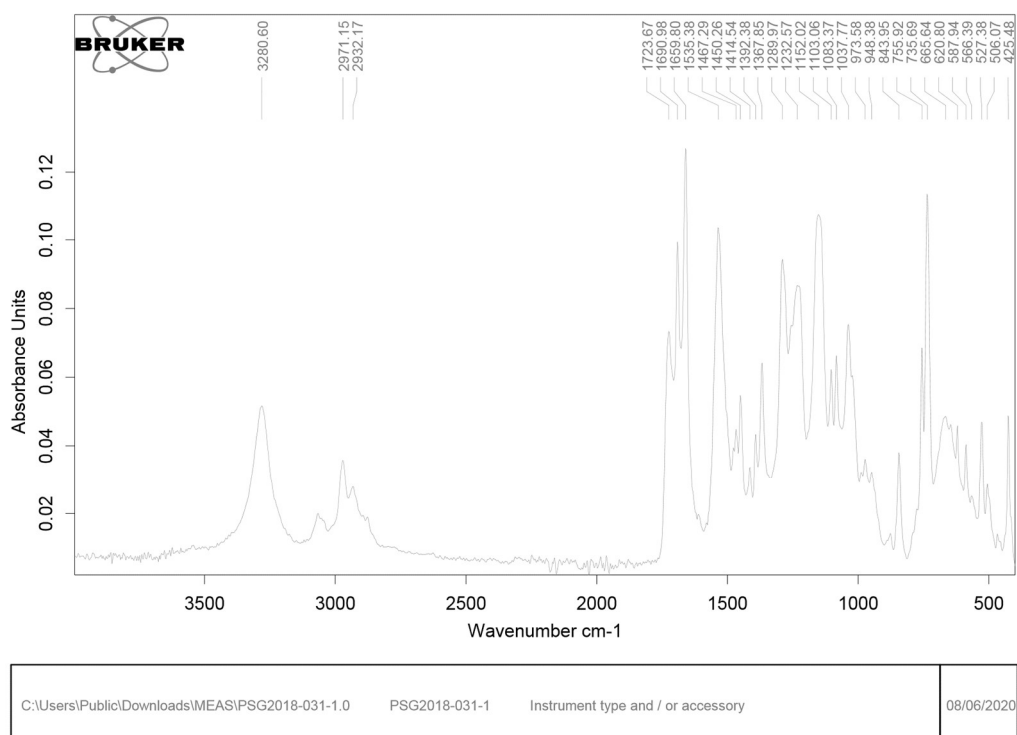

Figure S.114 – FT-IR spectra of compound (21)

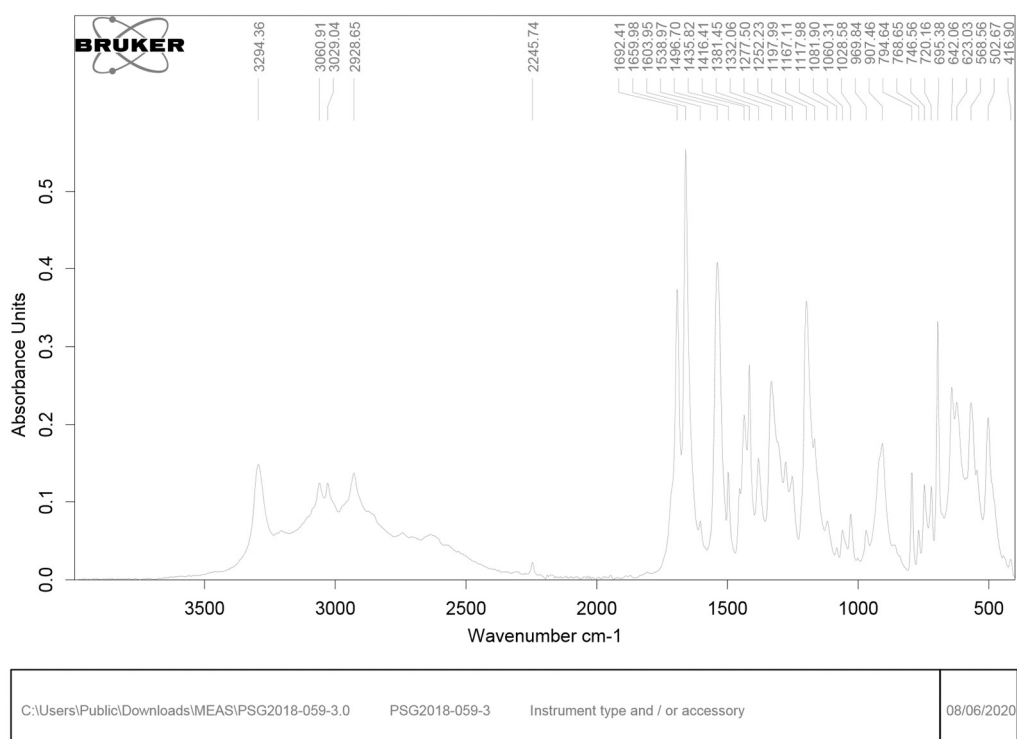

Figure S.115 – FT-IR spectra of compound (22)
